# An accurate genetic clock

David Hamilton \*

\*Department of Mathematics, University of Maryland, College Park

**Our method for “Time to most recent common ancestor” TMRCA of genetic trees for the first time deals with natural selection by a priori mathematics and not as a random factor. Bioprocesses such as “kin selection” generate a few overrepresented “singular lineages” while almost all other lineages terminate. This non-uniform branching gives greatly exaggerated TMRCA with current methods. Thus we introduce an inhomogenous stochastic process which will detect singular lineages by asymmetries, whose “reduction” then gives true TMRCA. Reduction implies younger TMRCA, with smaller errors. This gives a new phylogenetic method for computing mutation rates, with results similar to “pedigree” (meiosis) data. Despite these low rates, reduction implies younger TMRCA, with smaller errors. We establish accuracy by a comparison across a wide range of time, indeed this is only y-clock giving consistent results for 500-15,000 ybp. In particular we show that the dominant European y-haplotypes R1a1a & R1b1a2, expand from c3700BC, not reaching Anatolia before c3300BC. This contradicts current clocks dating R1b1a2 to either the Neolithic Near East or Paleo-Europe. However our dates match R1a1a & R1b1a2 found in Yamnaya cemeteries of c3300BC by Svante Pääbo et al, together proving R1a1a & R1b1a2 originates in the Russian Steppes.**

Molecular clock | Genetic tree | y-haplotype | Kin Selection

Abbreviations: TMRCA, STR, SNP, R1b1a2, R1a1a

## Introduction

The genetic clock, computing *TMRCA* by genetic mutations, was conceived by Emile Zuckerkandl and Linus Pauling[30] on empirical grounds. However work on genetic drift by Motoo Kimura[15] gave a theoretical basis and formula. Soon after pioneering work by L.L. Cavalli-Sforza [6], correlated genetic drift to age of lineages for human populations. Suppose at position  $j$  on the genome is distinguished by number  $x$  which in the next generation has mutation  $x \rightarrow x \pm 1$  occurring at rate  $\mu_j$ . Measuring total variance  $V$  from the mode [22] one finds that the  $TMRCA = V/(\sum_j \mu_j)$ . This method and variations (denoted as KAPZ) is used to estimate the TMRCA of y(chromosome) haplotypes defined by a SNP (single nucleotide polymorphism) mutation.

In practice sample sizes were too small to compute accurate mutation rates from “meiosis”, i.e. father-son pairs[4]. Alternatively, estimating rates from genetic lineages of known age gave rates with significant discrepancies between different lineages. Indeed for the y-clock these “phylogenetic” rates are often 2 times larger than those from meiosis, while the opposite may be true for other clocks [2], [9], [14], [16].

For the Y-chromosome we show that the mutation rates are essentially constant, at least for the time scale 500- 15,000 ybp, and over different lineages. However KAPZ cannot give accurate TMRCA, i.e. one needs deeper mathematics to deal with non-uniform branching. Also there is a paradox: we can accurately estimate the mutation rates of “short tandem repeat” (STR) at different DNA Y-chromosome Segments (DYS). But we find they can differ by more than a factor of 100, so over a very long time scale we expect their rates to vary as the genomes geometry changes. Also we find knowing the average mutation rate does not give accurate TMRCA.

Of course it was noticed that the mathematics underlying KAPZ is most accurate for large populations, indeed continuous distributions, whereas actual populations are small. In this case the same stochastic model generates many discrete distributions, indicating a need for Bayesian methods. These use Monte-Carlo simulations of all possible genealogical trees giving the present sample data, then find TMRCA by a maximum likelihood estimate (MLE). An example of this for the y-clock is BATWING[30]. However we shall see that Bayesian methods exaggerate the TMRCA even more than KAPZ. Also MLE is known for large confidence intervals. So our approach is different.

In particular for the y(chromosome)-clock the results have not been reliable. (Similar discrepancies occur for the mitochondrial clock for “out of Africa”, or for the allele clock for human-chimpanzee divergence [9], birds [15], bacteria[19].) A KAPZ due to Zhivotovsky [29] was applied to the y-haplotype R1b1a2 by Myres [18] giving 9000BC, standard deviation  $\sigma = 2000$ . Now for BATWING the *TMRCA* is often greater than KAPZ, e.g. for the Cinnioglu[7] study of Anatolian DNA both methods were applied to the same data and mutation rates. For R1b1a2 the KAPZ has TMRCA 9800BC compared with 18,000BC for BATWING. Balaesque [3] used BATWING to give an origin for R1b1a2 in Neolithic Anatolia c6000BC, but their statistics was disputed by Busby [5]. In verifying the accuracy of our method we simultaneously resolve the problem of the expansion of European y-haplotypes, for example R1b1a2.

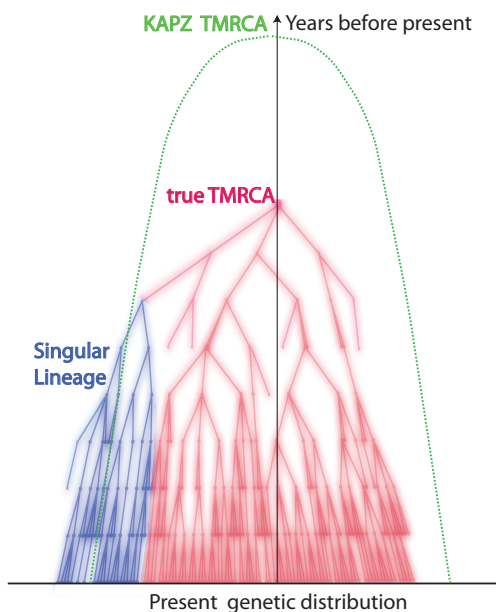

Fig. 1. Random tree

### Singular Lineages

A fundamental problem is that present populations have highly overrepresented branches we call *singular lineages*. A well known example is the SNP L21 which is a branch of R1b1a2. Individuals identified as L21 are often excluded from R1b1a2 analysis because they skew the results. Such a singular lineage causes the variance to be much greater, even though the original *TMRCA* remains unchanged, see figure 1.

For Bayesian methods such lineages are very unlikely giving an even greater apparent *TMRCA*. However one cannot deal with singular branches by excluding them. For one thing, our method will show that 50% of markers show evidence of singular side branches, i.e. more than a SD from expected. Excluding them would also remove some of the oldest branches and produce a *TMRCA* which is too young. Now these singular lineages are very (mathematically) unlikely to arise from the stochastic system which is the mathematical basis of KAPZ (or the equivalent Monte-Carlo process modeling BATWING). We believe that the standard stochastic process is perturbed by “improbable” biological processes.

First, the Watson-Galton process[18] implies lineages almost certainly die out. Conversely, natural selection causes some branches to flourish, e.g. the “kin selection” of W.D. Hamilton[13], shows kin co-operation gives genetic advantages. Consider three examples with well developed DNA projects. Group A of the Hamiltons has approximately 100,000 descended from a Walter Fitzgilbert c 1300AD. Group A of the Macdonalds has about 700,000 descendants from Somerfeld c1100AD, and Group A of the O’Niall has over 6 million descendants from Niall of the Seven Hostages, c300AD. These are elite groups with all the social advantages. One sees lines of chieftains, often polygamous. We emphasize kin selection because it seems dominant over natural selection for recent branching, certainly we do not think the O’Niall are genetically superior! Natural selection would cause similar branching over longer time scales. Our model has many extinct twigs with a few successful branches, whereas current models assume a uniform “star radiation”.

### Reduction of Singular Lineages

Although our method is for general molecular clocks to be specific we focus on the y-clock. Consider DNA Y-chromosome Segments (DYS) counting the “short tandem repeat” (STR) number of nucleotides. One uses many of these DYS microsatellites, marked by  $j = 1, \dots, N$ , each individual  $i$ ,  $1 = 1, \dots, n$ , has STR number  $x_{i,j}$ . The Y-chromosome is passed unchanged from father to son, except for mutations  $x_{i,j} \rightarrow x_{i,j} \pm 1$  occurring at rate  $\mu_j$ .

Modelling singular lineages requires a new stochastic system where instead of a single patriarch we imagine many “virtual patriarchs each originating at a different time and giving a fixed proportion of the present population. Solving for these times and proportions is an inversion problem. But inversion is unstable for such systems, also there is no unique solution. However it turns out that, up to a standard deviation, most DYS markers show at most one singular branch which is found from asymmetries in the distribution. These singular branches are then *reduced* revealing the original lineage. We then compute a branching time  $t_j$  for each marker  $j$ . Now the nonuniform branching process causes the  $t_j$  to be randomly distributed so their mean is not the *TMRCA* see figure 2. Large errors in mutation rates means one cannot simply take the max  $t_j$  to be the *TMRCA*. Instead stochastic simulations of the branching process, using robust statistics to avoid outliers, find the most likely *TMRCA*. The effect of reduction is dramatic, e.g. the *TMRCA* for R1b1a2 changes from 5500BC(KAPZ) to 3700BC after singular reduction, using the same markers and mutation rates, see Figure 3 and Table 1.

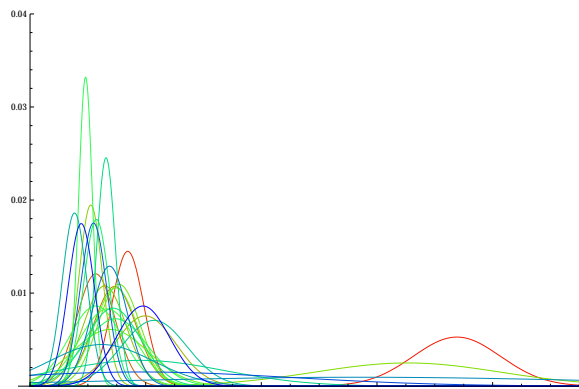

Fig. 2. Branching times  $t_j$  times (with errors) for R1b1a2 after reduction

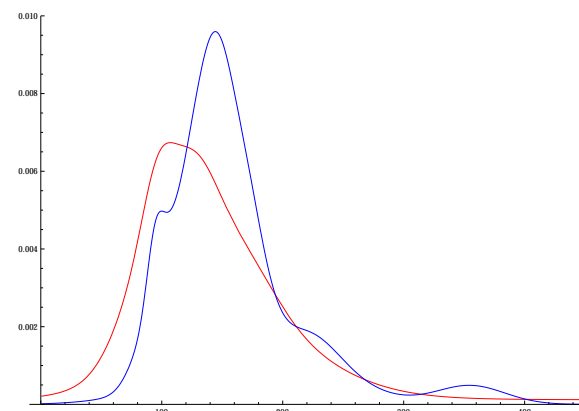

Fig. 3. R1b1a2 branching times before (blue) and after (red) reduction

## Accurate Mutation rates

By relying on asymmetries of the distribution to find singular lineages we have to be aware that the mutation process itself might not be symmetric. Indeed if ignored we might be just detecting these asymmetries. So the symmetric model has to be changed so the probability of a mutation is

$$Pr[x_{i,j} \rightarrow x_{i,j} + 1] = \mu_{j,+1}, Pr[x_{i,j} \rightarrow x_{i,j} - 1] = \mu_{j,-1}.$$

If this marker is free from singular lineages we find that the ratio of the frequencies to the left and right of the mode is

$$\frac{P_{j,1}(t)}{P_{j,-1}(t)} = \frac{\mu_{j,1}}{\mu_{j,-1}}.$$

which is time independent. So using eight very large SNP projects we find enough markers free of singularities to compute these ratios and their standard deviations. See Supplementary Information (SI) where Figure 5 shows results. In particular about half the markers show asymmetric ratios are significant, i.e more than two SD from ratio 1. These asymmetric ratios play a very important role, for this ratio is all you need to detect a singular lineage and reduce it. Of course not knowing the exact asymmetric ratio means that bootstrap methods are used extensively for singular reduction, both to compute values and SD.

These methods also imply a new way of computing mutation rates. Previously, there were methods based on meiosis data or phylogenetic studies of family DNA projects (which gave quite different rates). We begin with 8 very large SNP projects from FTDNA using 37 markers, of course with unknown *TMRCA*. We first reduce singular lineages. Then taking asymmetry into account we find mutation rates are the fixed points of an iterative process. This takes about 3 iterates to converge. These mutation rates are normally distributed with mean and SD. Discarding markers with mutation  $SD > 33\%$  leaves us with 29 markers. We find this advanced phylogenetic method gives mutation rates close to those obtained from meiosis and nearly 1/2 the values obtained from the usual phylogenetic method. Further validation comes from finding that the equivalence of our rates with meiosis implies *a priori* a human generation of c27 years.

## Results

Accuracy is verified by checking for consistency over the whole range of European history beginning with the medieval:

| Group            | <i>TMRCA</i> | <i>SD</i> | Origins               |
|------------------|--------------|-----------|-----------------------|
| <i>Hamilton</i>  | 1358AD       | [140]     | Fitzgilbert d1330AD   |
| <i>Macdonald</i> | 900AD        | [250]     | Norse c800 – 1000AD   |
| <i>O’Niall</i>   | 200AD        | [225]     | Niall 300AD/Conn100AD |

Archeological finds convinced Marija Gimbutas to attribute Proto Indo-European (PIE) to the Yamnaya Culture c 3500BC of the Russian Steppes, see [12]. This is consistent with mainstream linguistic theory, some even wrote of linguistic DNA. But actual genetics was ignored because current genetic clocks for R1b1a2 pointed to the Renfrew Hypothesis that PIE spread from Neolithic Anatolia, c 6000BC [34]. Or Mesolithic or Paleolithic, depending on the genetic clock. However no-one checked if their clock worked over the whole range of time for different lineages.

The next table shows the expansion times of the dominant European y-haplotypes R1b1a2 & R1a1a. These are very close to c3700BC, only Scandinavia is significantly later. This data is from FTDNA projects for region X only using individuals with named ancestor from X. These independent results agree within the standard deviation, with dates matching the Corded Ware Culture, a semi-nomadic people with wagons and horses who expanded west from the Ukraine c3500BC. This is consistent with the oldest R1b1a2, R1a1a skeletons being from the Yamnaya Culture, c 3300BC, see S. Pääbo et al [24].

| Region      | R1b1a2 [ <i>SD</i> ] | <i>n</i> | R1a1a [ <i>SD</i> ] | <i>n</i> |
|-------------|----------------------|----------|---------------------|----------|
| All         | 3700BC [625]         | 460      | 3800BC [700]        | 1270     |
| Russia      | NA                   |          | 3750BC [700]        | 337      |
| Poland      | 3960BC [950]         | 65       | 4600BC [820]        | 876      |
| Germany     | 2780BC [500]         | 438      | 3750BC [800]        | 190      |
| Scandinavia | 2550BC [500]         | 153      | 4500BC [1000]       | 140      |

An interesting intermediate step occurs between the medieval and eneolithic. The mythical Irish Chronicles relate that the O’Niall descend directly from the first Gaelic High Kings, which tradition dated c1300-1600BC. The O’Niall have the unique mutation M222 which is a branch of the haplotype L21. For L21,  $n = 1029$ , we compute  $TMRCA = 1600BC$  and  $SD = 320$ . These are dates for proto Celtic, i.e. what archeologists call the pre Urnfelder Cultures, c. 1300-1600BC. Furthermore L21 is in turn a branch of haplotype P312 which we date to 2300BC. This date suggests the Bell Beaker Culture of Western Europe. Indeed the only known [24] Bell Beaker genome was found to be P312 with  $^{14}C$  date 2300BC.

| data             | Haplotype | <i>n</i> | <i>TMRCA</i> | <i>SD</i> |
|------------------|-----------|----------|--------------|-----------|
| <i>Underhill</i> | R1a1a1    | 974      | 2550BC       | [400]     |
| <i>Rootsi</i>    | G2a2      | 536      | 18500BC      | [3500]    |

Our method requires large data sets and many markers which means we have to rely on data from FTDNA, finding 29 useable markers out of standard 37 they use. In fact many researchers [3] have used FTDNA data. We think our method of reduction with robust statistics solves any problems with this data. To test this we compared our results with R1a1a1

**Table 1. Major European SNP: Comparing Singular Reduction for 7, 15, 29 markers with KAPZ. Notice similar *TMRCA* for KAPZ and Singular Reduction, if there is little branching.**

| SNP    | <i>n</i> | KAPZ    | <SD  | 29 mk RSL | <SD  | 15 mk RSL | <SD  | 7 mk RSL | <SD  |
|--------|----------|---------|------|-----------|------|-----------|------|----------|------|
| G2a2b  | 1221.    | 4840BC  | 1257 | 5359BC    | 900  | 8600BC    | 2120 | 4800BC   | 2050 |
| R1b1a2 | 460.     | 5490BC  | 2144 | 3700BC    | 625  | 4300BC    | 950  | 5524BC   | 2000 |
| R1a1a  | 1270.    | 3670BC  | 1066 | 3800BC    | 700  | 3200BC    | 840  | 3400BC   | 1500 |
| I1     | 2898.    | 2400BC  | 1061 | 1800BC    | 400  | 2711BC    | 950  | 3500BC   | 1500 |
| L21    | 1029.    | 3270BC  | 1063 | 1600BC    | 325  | 1700BC    | 400  | 1870BC   | 800  |
| U 106  | 1533.    | 2530BC  | 628  | 2400BC    | 440  | 2500BC    | 600  | 1800BC   | 800  |
| J 2    | 1241.    | 11700BC | 2990 | 15500BC   | 2600 | 18500BC   | 3000 | 6100BC   | 2100 |
| P 312  | 971.     | 2900BC  | 632  | 2240BC    | 420  | 2850BC    | 625  | 2600BC   | 900  |

data obtained from Underhill[27] with  $n = 974$  (which involved excluding his four M420 individuals and others with missing markers), and 15 useable markers. The result was 2550BC SD = 400, within the CI of our R1a1a results. Table 1 shows the results of extensive simulations using random subsets of our FTDNA data, for 29, 15 and 7 markers. For the same 15 markers as the Underhill[27] the different FTDNA data gives very similar 3300BC SD = 840 for R1a1a, verifying the correctness of using FTDNA data. However once you get down to 7 markers the confidence interval becomes large, e.g. R1a1a gives 3400BC SD = 1500. Also it becomes difficult to deal with outliers.

An example with few markers is the R1b1a2 data of Balaesque[3]. Our method (this time with 7 useable markers) gave SD > 30%. Now Balaesque used the Bayesian method BATWING[30] to suggest a Neolithic origin in Anatolia. With the same Cinnioglu[7] data our method gives for Turkish R1b1a2 ( $n = 75$ ) a TMRCA = 5300BC, SD = 3100, i.e. anytime from the Ice Age to the Iron Age as seen in

| R1b1a2         | $n$ | TMRCA  | [SD]   |
|----------------|-----|--------|--------|
| <i>Eire</i>    | 75  | 1750BC | [1250] |
| <i>England</i> | 74  | 1844BC | [1250] |
| <i>Spain</i>   | 207 | 4600BC | [1900] |
| <i>France</i>  | 62  | 4300BC | [2400] |
| <i>Germany</i> | 147 | 5650BC | [2300] |
| <i>Turkey</i>  | 69  | 5300BC | [3100] |

Fortunately, once again, we find good data from FTDNA: the Armenian DNA project, see below. By tradition the Armenians entered Anatolia from the Balkans c1000BC so they might not seem a good example of ancient Anatolian DNA. But some 100 generations of genetic diffusion has resulted in an Armenian distribution of Haplotypes J, G, R1b1a2 closely matching that of all Anatolians, therefore representative of typical Anatolian DNA. We see that Anatolian R1b1a2 arrived after c3300BC, ruling out the Neolithic expansion c6000BC. When dealing with regional haplotypes, e.g. R1b1a2 in Anatolia, the TMRCA is only an upper bound for the arrival times, for the genetic spread may be carried by movements of whole peoples from some other region. This means one has to be careful interpreting regional data, e.g. the TMRCA for the R1b1a2(USA) is c3700BC but nobody thinks it arrived then.

| Armenian | $n$ | TMRCA   | [SD]   |
|----------|-----|---------|--------|
| R1b1a2   | 99  | 3300BC  | [800]  |
| G2a2b    | 46  | 9300BC  | [2000] |
| J2       | 97  | 12100BC | [2200] |

Observe that our TMRCA for Armenian G2a2b (formerly G2a3) and J2 show them to be the first Neolithic farmers from Anatolia, i.e. older than 7000BC. From Table 1 we see J2, G2a2b for all of Western Europe (non-Armenian data). Our dates show J2 was expanding at the end of the Ice Age. Modern J2 is still concentrated in the fertile crescent, but also in disconnected regions across the Mediterranean. The old genetic model predicted a continuous wave of Neolithic farmers settling Europe [8]. But you cannot have a continuous maritime settlement: it must be *leap-frog*. Also repeated resettlement from the Eastern Mediterranean has mixed ancient J2 populations, and our method gives the oldest date. On the other hand G2a2b shows exactly the dates expected from a continuous wave of Neolithic farmers across Central Europe. Our dates are consistent with recent findings that the majority of early Neolithic skeletons found in Western Europe are G2a2, c 5000BC see[33], whereas the oldest R1b1a2 found so far is Bellbeaker c2300BC, [24], [25].

## Discussion

Archeology, evolutionary biology, not to mention epidemiology, forensics and genealogy are just some of the applications of molecular clocks. Unfortunately current clocks have been found to give only “ballpark” estimates. Our method is the only one giving accurate time, at least for the human y-chromosome verified over the period 500 – 15,000ybp. There should be many applications for this y-clock, not to mention generalizations to mitochondrial and allele clocks.

Some geneticists thought natural selection makes mutation rates too variable to be useful. The problem is confusion between the actual biochemistry giving mutations and superimposed processes like kin selection producing apparently greater rates. Notice that the SD for our mutation rates is on average 14% which is much smaller than the actual previous rates. We believe this proves the reality of neutral mutation rates.

Many applications to genetics, forensics, genealogy require the TMRCA between just two individuals, or between two species, a classic method was given by Walsh[28]. While we are accurate for “big data”, for this “two-body problem” one cannot determine what singular lineages the branching has been through. Just using our new asymmetric mutation rates will not work. So it would be important to find an accurate method.

Pääbo et al[24], [25] observed all 6 skeletons from Yamnaya sites, c 3300BC by  $^{14}C$  dating, are either R1a1b1 and R1a1a. This and other work [33] involve very difficult genetic analysis of specimens which may not always be available. Also such analysis cannot date the origin of R1a1b1 and R1a1a. Our TMRCA shows both these haplotypes expanding at essentially the same time c3700BC. This and our later date for Anatolia, combined with Pääbo et al, implies that R1b1a2 and R1a1a must have originated in the Yamnaya Culture.

In checking accuracy we ran into the question of the origins of PIE. Although there are genes for language there is certainly none for any Indo-European language. Thus inferences have to be indirect. Marija Gimbutas saw patterns in symbolism and burial rituals suggesting the Yamnaya Culture was the cradle of Proto Indo-European. Also their physiology was robustly Europeanoid unlike the gracile skeletons of Neolithic Europe, but this could be nutrition and not genetic. From the above we conclude that the spread of this robust type into Western Europe in the late Neolithic marked an influx of Steppe nomads. Now if R1b1a2 had been shown to spread from Anatolia c6000BC it would have been taken as strong evidence for “out of Anatolia” because of the association of R1b1a2, R1a1 with Indo-European languages. But our accuracy check showed that it was G2a, J2 that spread with the Neolithic Expansion from Anatolia. Now these have been associated with Caucasian languages or Semitic, but never with Indo-European.

## Materials and Methods

This work is biomathematical theory validated by data from published sources, see Supplementary Information SI for full mathematical development, data, algorithms and detailed MATHEMATICA worksheets. To verify the theory and compute mutation rates we use diverse data, from FTDNA y-haplotype projects for G2a2b, R1b1a2, R1a, I1, L21, U106, J2, P312. Also we used regional projects for Germany, Scandinavia, Poland and Russia for their R1b1a2, R1a1a data. The Armenian DNA project was important for its R1b1a2, J2 and G2a2b data. We also used DNA projects M222 (O’Niall), Macdonald (Group A which is R1a1a), Hamilton (group A which is I1). This was compared with non FTDNA data from Balaesque, Underhill and Roots.



1. D.W. Anthony, (2007) *The Horse, the Wheel and Language*, Princeton Univ. Press, Princeton
2. F. J. Ayala et al (2001) Erratic overdispersion of three molecular clocks: GPDH, SOD, and XDH, *Proc Natl Acad Sci USA* vol. 98 no. 20 pp 11405-11410
3. P. Balaresque et al (2010) A predominantly Neolithic Origin for European paternal Lineages, *PLoS Biol* ; 8: e1000285.
4. C. Burgarella et al (2011) Mutation rate estimates for 110 Y-chromosome STRs combining population and father-son pair data, *European Journal of Human Genetics* 19, pp.70- 75; doi:10.1038/ejhg.2010.154
5. G. Busby et al The peopling of Europe and the cautionary tale of Y chromosome lineage R-M269, *Philos Trans R Soc Lond. Biol Sci.* 2012 Mar 7; 371(1730):884-92. doi: 10.1098/rspb.2011.1044
6. L.L. Cavalli-Sforza et al (2009) Y chromosome diversity, human expansion, drift, and cultural evolution, *Proc Natl Acad Sci USA* 106, pp. 20174-20179.
7. C. Cinnioglu et al. (2004) Excavating Y-chromosome haplotype strata in Anatolia. *Hum Genet.* 114, pp.127- 148.
8. C. Edmonds, A.Lillie, L.L.Cavalli-Sforza Mutations arising in the wave front of an expanding population, *Proc Natl Acad Sci USA* (2004); 10, pp 975-979.
9. N. Elango, J.W. Thomas , S. V. Yi (2006) Variable molecular clocks in hominoids *Proc Natl Acad Sci USA* vol. 103, no.5, pp13701375
10. C. Epstein, C. and R. Mazzeo(2013) *Degenerate Diffusion Operators Arising from Population Biology*, Princeton
11. J.N. Fenner, (2005) Cross-Cultural Estimation of the Human Generation Interval for Use in Genetics-Based Population Divergence Studies *American Journal of Physical Anthropology* 128pp 415-428.
12. M. Gimbutas,(1956) *The Prehistory of Eastern Europe, Part 1*, Cambridge:American School of Prehistoric Research #20.
13. W.D. Hamilton (1964) *The genetical evolution of social behaviour. I, II.* *Journal of Theoretical Biology* 7 (1) pp 1- 52.
14. S.Y. Ho, M.J. Phillips, A. Cooper, A.J. Drummond (2005), Time dependency of molecular rate estimates and systematic overestimation of recent divergence times. *Molecular Biology & Evolution* 22 (7): pp 1561-1568.
15. J. Hunt, E. Bermingham, R.Ricklefs, (2001) Molecular systematics and biogeography of Antillean thrashers, tremblers, and mockingbirds Aves: Mimidae. *Auk* 118 (1)pp. 35 - 55 doi:10.1642/0004-8038
16. M. Lynch (2010), Rate, molecular spectrum, and consequences of human mutation, *Proc Natl Acad Sci USA* vol. 107 , no. 3 pp 961968
17. M. Kimura (1968) Evolutionary rate at the molecular level. *Nature* Vol. 217, pp 624 - 626 , doi:10.1038/217624a0
18. D.G. Kendall (1975) *The Genealogy of Genealogy Branching Processes before (and after) 1873*, *Bulletin of the London Mathematical Society* 7 (3) pp 225- 253.
19. Andrew H. Knoll et al. (2011) , Estimating the timing of early eukaryotic diversification with multigene molecular clocks, *Proc Natl Acad Sci USA* vol. 108, no. 33, pp 1362413629
20. P. Menozzi, A. Piazza, L.L. Cavalli-Sforza Synthetic maps of human gene frequencies in Europeans. *Science*(1978) 201:786- 792
21. N. Myre, N. et al A major Y-chromosome haplogroup R1b Holocene era founder effect in Central and Western Europe, *European Journal of Human Genetics* 19(1) pp 95101
22. Nielsen, R. (Editor)(2005) *Statistical Methods in Molecular Evolution*, Springer.
23. F. W. J. Olver (1964) Bessel functions of integer order pp. 355- 434 *Handbook of Mathematical Functions* edited by M. Abramowitz National Bureau of Standards, Washington.
24. S. Pääbo et al (2014), Ancient human genomes suggest three ancestral populations for present-day Europeans, *Nature* 513, pp 409-413.
25. D. Reich et al (2015) Massive migration from the steppe was a source for Indo-European languages in Europe, *Nature* 14317, doi:10.1038/nature1431
26. S. Rootsi S. et al (2012) Distinguishing the co-ancestries of haplogroup G Y-chromosomes in the populations of Europe and the Caucasus, *Eur J Hum Genet.* 20(12)pp 1275-82. doi: 10.1038/ejhg.2012.86.
27. Peter A Underhill et al, (2015) The phylogenetic and geographic structure of Y-chromosome haplogroup R1a , *European Journal of Human Genetics* 23, pp124-131; doi:10.1038/ejhg.2014.50
28. B. Walsh (2001) Estimating the Time to the Most Recent Common Ancestor for the Y chromosome or Mitochondrial DNA for a Pair of Individuals, *Genetics* 158, pp 897-912
29. C.F. Wehrhahn(1975) The evolution of selectively similar electrophoretically detectable alleles in finite natural populations, *Genetics* 80, pp 375- 394.
30. I. J. Wilson, M.E. Weale, D.J. Balding (2003) Inferences from DNA data: population histories, evolutionary processes and forensic match probabilities. *J Roy Statist Soc A.* (2003);166:1-33.
31. L.A. Zhivotovsky, L.A. (2000), Estimating Divergence Time with the Use of Microsatellite Genetic Distances, *Molecular Biology and Evolution* 18, No 5, pp 705-709
32. E. Zuckerkandl and L. Pauling (1965) Evolutionary divergence and convergence in proteins. In Bryson, V. and Vogel, H.J. (editors). *Evolving Genes and Proteins*. Academic Press, New York. pp. 97-166.
33. M. Lacana et al (2011) Ancient DNA suggests the leading role played by men in the Neolithic dissemination, *Proc Natl Acad Sci USA* vol. 108, no.45, pp1825518259
34. A.C. Renfrew (1987) *Archaeology and Language: The Puzzle of Indo-European Origins*, London: Pimlico.

**ONLINE TEXT: Supplementary Information**

1. Biomathematical theory
2. Mutation rates tables
3. Mathematica worksheets
4. Data

## Biomathematical theory

We emphasize the role of extraneous forces like kinselection which operates on too big a scale and rarely enough with results that cannot be subsumed into the mutation rates. So we return to basic principles.

**Fundamental Solutions:** The Y-chromosome has DYS marked by  $j = 1, \dots, N$ , where one can count the STR number  $x_j$ . Consider the probability  $P_{j,k}$  (at time  $t$  generations) that at marker  $j$  we have  $x_j = k$ . This satisfies the homogenous stochastic system

$$\frac{P_{j,k}(t)}{dt} = -\mu_j P_{j,k} + \sum_{m>0} \mu_{j,-m} P_{j,k-m} + \mu_{j,m} P_{j,k+m}$$

This homogenous system gives a uniform expansion from a single patriarch.

The system is essentially the model of Wehrhahn[29] who had  $\mu_{j,-1} = \mu_{j,1}$ . We introduce asymmetric mutations with total rate

$$\mu_j = \sum_{m>0} \mu_{j,-m} + \mu_{j,m}$$

About 50% of DYS markers show asymmetric mutations, i.e.  $\mu_{j,-1} \neq \mu_{j,1}$ .

The fundamental solution comes from the generator function

$$G(z, t) = \sum_{k=-\infty}^{\infty} P_{j,k} z^k,$$

with complex variable  $z$ , and normalized initial condition  $x_j = 0$  or  $P_{j,0}(0) = 1$ :

$$G(z, t) = \text{Exp}[-\mu_j t + t \sum_{m>0} \mu_{j,-m} z^m + \mu_{j,m} z^{-m}]$$

Then  $G$  can be expanded in powers of  $z$  to give  $P_{j,k}(t)$ . Now for the simplest asymmetric case, with only one step mutations, we have  $G(z, t) = e^{-\mu_j t} e^{t\mu_{j,-1}z} e^{t\mu_{j,1}/z} =$

$$e^{-\mu_j t} \left\{ \sum_{m=0}^{\infty} \frac{\mu_{j,-1}^m}{m!} (zt)^m \right\} \left\{ \sum_{m=0}^{\infty} \frac{\mu_{j,1}^m}{m!} (t/z)^m \right\}$$

so using the Hyperbolic Bessel Function of Order  $k \geq 0$ , see Olver<sup>7</sup>

$$I_k[u] = \sum_{m=0}^{\infty} \frac{u^{2m+k}}{2^{2m+k} m!(m+k)!},$$

we see that the homogenous system has fundamental solution

$$P_{j,k}(t) = e^{-\mu_j t} \left( \frac{\mu_{j,1}}{\mu_{j,-1}} \right)^{k/2} I_{|k|}[2t\sqrt{\mu_{j,-1}\mu_{j,1}}]$$

From this we obtain the second moment:

$$\sum_{k=-\infty}^{k=\infty} k^2 P_{j,k} = \left\{ \frac{d}{dz} z \frac{d}{dz} G(z, t) \right\}_{z=1} = t\mu_j + t^2(\mu_{j,1} - \mu_{j,-1})^2$$

Also from the fundamental solution we find, independently of time

$$\frac{P_{j,1}(t)}{P_{j,-1}(t)} = \frac{\mu_{j,1}}{\mu_{j,-1}},$$

which we call the *asymmetric ratio*. It will be repeatedly used.

Of course the actual initial value is not  $x_j = 0$  but was usually taken to be the mode  $m_j$  which was assumed to be the value for original patriarch. Assuming symmetry, i.e.  $\mu_{j,-1} = \mu_{j,1}$ , the TMRCA is:

$$T = \frac{1}{n\mu} \sum_{j,i} (x_j(i) - m_j)^2, \quad \mu = \sum_j \mu_j.$$

From the present distribution of data we use the frequency

$$f(j, k) = \frac{\text{Count}(x_j(i) = k)}{n}.$$

One problem with the KAPZ formula is that higher frequencies  $f(j, k)$ ,  $|k| = 2, 3, \dots$  are overrepresented in the actual data. This is because the probability of a spontaneous two step mutation is much higher than the product of two one step mutations. So instead we use the frequency to solve the transcendental equation for the unknown  $t$

$$f(j, 0) \sim P_{j,0}(t) = e^{-\mu_j t} I_0[2t\sqrt{\mu_{j,-1}\mu_{j,1}}]$$

This nonlinear equation is easily solved via mathematical software such as MATHEMATICA (I used version 9 running on a boosted 2014 iMac which has accurate hyperbolic Bessel functions. Earlier versions on older iMacs gave inaccuracies so one had to compile one's own functions). Using this formula resolves some other problems with the KAPZ method, e.g.  $\mu_{j,-1} \neq \mu_{j,1}$  gives an extra quadratic term which if ignored causes large errors.

**Heterogeneous diffusion equation :** However the main problem is singularities in the stochastic process. For a uniform stochastic process,  $1 - P_{j,0}(t) \sim 1 - f(j, 0)$  is the probability of some mutation. So the expected variance is  $f(j, 0)(1 - f(j, 0))$ . Thus if the actual data variance  $V_j \gg f(j, 0)(1 - f(j, 0))$  we are not uniform. Now a sublineage of very high fertility increases variance, giving apparently greater TMRCA although it is unchanged. One finds similar results for Bayesian methods.

The correct approach to nonuniformity assumes at times  $t_i$  (generations ago) a certain proportion  $0 \leq \rho_i \leq 1$  of the present population originated from a "virtual patriarch" with an initial STR value  $m_i$ . The resulting system :

$$\frac{p_{j,k}(t)}{dt} = -\mu_j p_{j,k} + \sum_{m>0} \mu_{j,-m} p_{j,k-m} + \mu_{j,m} p_{j,k+m} + d\rho$$

i.e.  $d\rho$  are atoms of weight  $\rho_i$  with STR value  $m_i$  occurring at time  $t_i$ . As the system is linear and isotropic the solution is a combination of fundamental solutions  $P$  of the homogenous system. Thus the present distribution  $f(j, k)$  is

$$f(j, k) = \sum_i \rho_i P_{j,k-m_i}(t_i)$$

This allows us to consider populations mixed by having singular lineages from overfertile patriarchs, or by actual immigration from the outside. The inverse problem seeks to find singularities from present data. Unfortunately inversion is ill posed for such systems like the heat equation. This instability produces poor accuracy. Furthermore there is no unique solution, e.g. the present distribution could have been created yesterday.

However we find that  $\sim 50\%$  of the DYS markers show no significant difference from the uniform expansion of a single

patriarch, i.e. the data variance  $V_j$  is close to the expected variance  $f(j,0)(1-f(j,0))$ . The other markers show at most one significant side branch, i.e. there is an original branch starting at time  $t_{j,0}$  with STR  $m_0$  and a second one with STR  $m_1 = m_0 \pm 1$  at time  $t_{j,1} < t_{j,0}$  with significant  $0 < \rho_1 < \rho_0$ .

**Reduction :** We locate these singular lineages by looking for asymmetries in the distribution. For a uniform flow from a single patriarch the frequency of STR value  $k$  is given by  $f(j,k) \sim P_{j,k}(t)$ . The asymmetric ratio:

$$\frac{f(j,1)}{f(j,-1)} \sim \frac{P_{j,1}(t)}{P_{j,-1}(t)} = \frac{\mu_{j,1}}{\mu_{j,-1}},$$

is completely independent of time  $t$ . Therefore if say

$$\frac{f(j,1)}{f(j,-1)} \gg \frac{\mu_{j,1}}{\mu_{j,-1}},$$

we have a singular lineage at  $k = +1$ . Thus the excess at  $k = +1$  is

$$f(j,+1) - f(j,-1) \frac{\mu_{j,1}}{\mu_{j,-1}}$$

To first order approximation then frequency  $f(j,+2)$  is due to this singularity at  $j = +1$  which therefore gave a contribution

$$f(j,+2) \frac{\mu_{j,-1}}{\mu_{j,+1}}$$

to  $k = 0$ . Thus removing the effect of the singularity at  $k = +1$  leads to new frequencies

$$\begin{aligned} f^*(j,-1) &= f(j,-1) \\ f^*(j,0) &= f(j,0) - f(j,+2) \frac{\mu_{j,-1}}{\mu_{j,+1}} \\ f^*(j,+1) &= f(j,+1) - f(j,-1) \frac{\mu_{j,1}}{\mu_{j,-1}} \end{aligned}$$

These of course are no longer normalized so we rescale to obtain the renormalized frequency  $F(j,k)$ , e.g.

$$F(j,0) = \frac{f^*(j,0)}{f^*(j,0) + f^*(j,-1) + f^*(j,+1)}$$

which will be used to compute the expansion time for marker  $j$ . There are similar formulae if the singularity was at  $k = -1$ .

However there is sampling error both in the frequencies and the  $\mu_{j,1}, \mu_{j,-1}$ . So we bootstrap taking into account these uncertainties, running the computation thousands of times. Generally we find the branch singularity is always one of  $k = 0, +1, -1$  with no SD. In a few cases the singularity may seem to wander between  $k = 0, +1, -1$ . So in the case of a wandering singularity we obtain a distribution over  $k = 0, +1, -1$  with a mean and SD. In these cases we find the singularity is relatively small and does not make much difference to the final result. However to have a stable method we do not throw out these wandering singularities but in the algorithm use the mean to average between  $k = 0$  and  $k = \pm 1$ , e.g. if the mean is  $k = 0$  then we use the original unreduced frequency.

Notice that we assume at most one side branch. In theory there could be many and solving for these produce even better approximations to the present data. In fact you could get perfect matching but find the atoms were created yesterday! The thing is that while many markers show significant deviation from a uniform flow from a single patriarch, after we have

carried out reduction for one possible side branch we find no significant difference from a uniform flow, i.e. the difference is within the SD. This is of course an approximation, the next level beyond Zuckerkandl and Pauling, but given the noise in the data perhaps the best we can do. Later we further reduce the effect of outliers by using robust statistics.

Reducing the singular lineages increases the frequency  $f(j,0)$  of the mode and decreases the computed *TMRCA*. But as the method of reducing singularities does not respect higher frequencies  $f(j,k)$  it follows the KAPZ formula cannot be used and instead we use the probability of no mutations, i.e. solve

$$F(j,0) = e^{-\mu_j t} I_0[2t\sqrt{\mu_{j,-1}\mu_{j,1}}]$$

This is done for each DYS marker  $j$ , giving expansion times  $t_1, \dots, t_N$  for each marker, with computed CI. (An extra fixed source of error is the uncertainty in the mutation rates which we deal with later). We find the reduction of singularities makes striking difference to the  $t_j$  of the effected markers, often a reduction of  $\sim 50\%$  for *TMRCA*.

Now the existence of side branches implies that the main branch could itself have been the side branch for an earlier branch that did not survive. Thus we do not expect the expansion times  $t_1, \dots, t_N$  for each marker to be essentially equal, i.e they are not within the SD of each other. Indeed we see that the distribution of the times  $t_j$  for different markers are almost certainly not randomly arranged about a single *TRMCA*  $T$  but distributed from  $T$  to the present. This is seen whether you use reduction or not, or our mutation rates or not. (For a given population one could scale mutation rates to get equal  $t_j$ , but then applying these adhoc mutation rates to other populations does not yield the same values). The spread out distribution of surviving branches is another verification of our theory of many extinctions, few survivors. The distribution of the times  $t_j$  for different markers we call the branching distribution, which is now discussed.

**The Branching Distribution :** The times  $t_j$  for different markers are sorted from the youngest to the oldest, forming a sequence  $t_1^*, \dots, t_N^*$ . The generation of these branches is by an unknown probability distribution  $d\tau_0$  over  $[0, T]$ . We model  $d\tau_0$  by assuming a surviving lineage is generated at random with probability  $\beta\Delta t$  in time period  $[t, t + \Delta t]$ , multiplied by the probability that the branching hasn't already occurred. The constant  $\beta$  averages fertility and extinction rates, the chance of a new lineage surviving. As  $\beta \rightarrow \infty$  we get current theory where all lineages originate from a single patriarch at time  $T$ . Simulations with the data show that  $\beta$  varies in the range 1 to  $\infty$ . We make no a priori estimate of  $\beta$ , unlike Bayesian methods where an overall fertility rate is a predetermined parameter. Instead our stochastic simulation will find the most likely  $\beta, T$  in each case. Assuming independence, then the generation of branches follows the well known exponential distribution:

$$\tau_0[t] = \text{Exp}[\beta(t - T)] \text{UnitStep}[T - t]$$

Notice this implies a finite probability that some markers have essentially zero mutations. This is actually seen in examples. Both the Hamilton Gp A and Macdonald Gp A have number of individuals  $n > 100$ . For the time scale of  $> 700$  years we do not expect there is more than one marker out of 33 which shows absolutely no mutations from the mode. In fact in both cases there are 8 markers where all  $n$  individuals have exactly the same STR value.



Estimating the parameter  $T$  for an exponential distribution is a well known problem of statistics. Kendall proved the best estimate for  $T$  would be  $\max t_j$ . Unfortunately there is also considerable error  $\lambda_j\%$  for the mutation rates  $\mu_j$ . Later we give a method for reducing this error, even so we find the SD in the range 10%–30% which gives corresponding range in error for each  $t_j$ . We understand that the  $t_j$  are being generated by the distribution  $d\tau$  but superimposed on this is a further uncertainty due to mutation rates etc. In particular the largest  $t_j$  may be wildly inaccurate. Also we found that simply taking the average consistently underestimates the *TMRCA* by a wide margin.

Assuming the mutation rates have normal distribution with mean  $\mu_j$  and variance  $\lambda_j^2\mu_j^2$ , the  $t_j$  have SD  $t_j\lambda_j$ . Thus the actual data for  $t_j^*$  has probability density function for  $s > 0$

$$d\tau(s) = \int_0^T \frac{e^{-(t-T)/\beta}}{\beta} \frac{e^{-\frac{(t-s)^2}{2\nu}}}{\sqrt{2\pi\nu}} dt .$$

The variance  $\nu$  depends on two sources. First from the uncertainty in mutation rates, for each marker we get variance  $\lambda_j^2$ , giving total

$$\nu_1 = \frac{1}{N} \sum_j \lambda_j^2$$

However a small sample also has inherent error from sampling. We are measuring the probability that there is a mutation. This is binomial with probability  $H_j = H_j(t) =$

$$1 - P_{j,0}(t) = 1 - e^{-\mu_j t} \left( \frac{\mu_{j,1}}{\mu_{j,-1}} \right)^{k/2} I_0[2t\sqrt{\mu_{j,-1}\mu_{j,1}}]$$

Hence for sample size  $n$  there is variance  $H_j(1-H_j)/n$ , so the variance in time due to this is scaled by the derivative giving:

$$\nu_2 = \frac{H_j(1-H_j)}{n(H'_j)^2}$$

The function  $H'_j$  has actually to be computed as an inverse function depending on  $H_j$ . Therefore the total variance averaged over all  $N$  markers is  $\nu = \nu_1 + \nu_2$ . Although for large samples ( $n > 1000$ ) the second term is insignificant it does effect the results once you get to  $n = 100$ . In our algorithm the branching distribution is used to generate large numbers of random branching times so as to bootstrap error estimates. It turns out much faster to compile the distribution function as a table which can be repeatedly called on.

**Estimating TMRCA by Robust Statistics** :Inaccurate large values of  $t_j^*$  are mitigated by using “robust” statistics with quintiles instead of means/variances. Using FTDNA data we began with 37 markers. However the 4 markers of DYS464 are unordered and cannot be used. Also we find that markers DYS 19/394, 385b, 459b, CDYb have errors  $> 33\%$  in mutation rates so are not used. (These are some of the most popular ones in the literature!). So usually we have  $N = 29$  markers and take “quintiles”  $\theta^* = (t_9^*, t_{12}^*, t_{15}^*, t_{18}^*, t_{21}^*)$ . This means that tail end data is not discarded but kept as the information there are 8 values of  $t_j^* > t_{21}^*$ , which effectively deals with outliers. Bootstrap methods give the confidence interval CI for each quintile.

Thus we wish to find the best estimate of  $T$  given  $\theta^*$  (and CI). This well known statistical problem was investigated by Stochastic Simulations (SS). We also tried Maximum Likelihood Methods which gave similar results but with larger CI. Monte-Carlo Methods are used to produce very large numbers ( $\sim 10^7$ ) of  $T$ ,  $\beta$  with corresponding Distribution. These

randomly generate ordered times ( $s_1 \dots s_{29}$ ) for which we take the quintiles  $\theta = (s_9, s_{12}, s_{15}, s_{18}, s_{21})$ . We filter by requiring that  $\theta$  close to the data  $\theta^*$ , i.e.  $\|\theta^* - \theta\| < 2SD$ . This gives a stochastic neighborhood  $\mathcal{U}$  of  $\theta^*$  typically containing  $> 10^5$  sets of data but with  $T$  is known for each  $\theta \in \mathcal{U}$ . Thus we can construct a quasilinear estimator:

$$QL(s_9, s_{12}, s_{15}, s_{18}, s_{21}) = q_1 s_9 + q_2 s_{12} + q_3 s_{15} + q_4 s_{18} + q_5 s_{21} ,$$

and use least squares over  $\mathcal{U}$  to find constants ( $q_1, q_2, q_3, q_4, q_5$ ) minimizing

$$\|q_1 s_9 + q_2 s_{12} + q_3 s_{15} + q_4 s_{18} + q_5 s_{21} - T\| .$$

The ( $q_1, q_2, q_3, q_4, q_5$ ) are computed in MATHEMATICA . We test this by applying the QL to all of  $\mathcal{U}$ , unsurprisingly

$$Mean_{\mathcal{U}}[q_1 s_9 + q_2 s_{12} + q_3 s_{15} + q_4 s_{18} + q_5 s_{21} - T] \sim 0$$

What is important is that we find the uncertainty in the SS itself. Actually this depends on the data and is calculated in each case but for our examples we find

$$SD_{\mathcal{U}}[q_1 s_9 + q_2 s_{12} + q_3 s_{15} + q_4 s_{18} + q_5 s_{21} - T] \sim .05 T$$

Finally the quasilinear estimator is applied to the experimental data

$$(t_9^*, t_{12}^*, t_{15}^*, t_{18}^*, t_{21}^*)$$

to obtain our best estimate of  $T$ . Application of *QL* computes the SD for our data, giving part of the overall SD. This must be combined with the SD coming from the uncertainty in the SS. Overall we find that our method has SD  $\sim 12\%$ , this includes variances from our data, mutation rates and uncertainty in the SS. We also tested with 15 and 7 markers. Here one must use “quintiles”  $\tau = (t_5^*, t_8^*, t_{11}^*)$ ,  $\tau = (t_3^*, t_5^*)$ , respectively with all the loss of accuracy that implies. See Table 1 for comparisons using 29, 15, 7 markers on same data.

### Accurate Mutation rates:

**Any genetic clock depends on reasonably accurate mutation rates. The meiosis method looks for mutations in father-son studies. However typical rates of  $\mu = .002$  would require nearly 50,000 pairs to get an SD of 10%. Small samples have meant large errors. The phylogenetic approach studies large family groups with well developed DNA/genealogy data. So inverting the KAPZ formula would yield accurate rates. However, singular lineages makes this problematic. Genealogical data might give mutation rates much greater than the biochemical rates because kin selection etc tend to exaggerate the apparent mutation rate. An inspection of 10 different sources finds mutation rates claiming SD  $\sim 10\%$  yet they differ from each other by up to 100%. We describe a new method.**

To compute our rates we apply our theory to the large DNA projects for the SNP M222, L21, P312, U106, R1b1a2, I1, R1a1a. This avoids dealing with populations such as family DNA projects which are self selecting, i.e only those with the correct surname which neglects distant branches. Also we have very large samples, our average  $n > 1000$ . Greater accuracy should come from more generations and individuals. The problem is that we do not know their *TMRCA*.

**Asymmetric Mutation:** However before computing mutation rates we must consider asymmetric mutations, i.e. the left and right mutation rates  $\mu_{j,-1} \neq \mu_{j,1}$ . For a uniform stochastic process we again use the asymmetric ratio

$$\frac{p_{j,1}(t)}{p_{j,-1}(t)} = \frac{\mu_{j,1}}{\mu_{j,-1}} = \frac{A_j}{1 - A_j}$$

to define the *asymmetric constant*  $A_j \in [0, 1]$  for marker  $j$ . For example  $A_j = 0.5$  is complete symmetry. Of course singularities will effect this ratio, however these only occur  $< 50\%$  of markers. Thus for each marker, SNP we compute this ratio. We find the SD for each SNP is relatively small while the difference between SNP can be large. However for each marker, using 8 SNP enables outliers to be easily removed leaving allowing us to use simple linear regression: i.e. average of the  $A_j$  over the remaining SNP groups. We see that asymmetry is a real effect: 50% of the  $A_j$  are more than two SD from symmetry  $A_j = 0.5$ .

Observe this is significant. The total second moment is

$$\sum_j \sum_{k=-\infty}^{k=\infty} k^2 P_{j,k} = t \sum_j \mu_j + t^2 \sum_j (\mu_{j,1} - \mu_{j,-1})^2$$

So using all our 33 DYS markers with our  $\mu_j$ , we compute constants

$$\mu = \sum_j \mu_j = .12006, \tau = \sum_j (\mu_{j,1} - \mu_{j,-1})^2 = 0.000236$$

The KAPZ formula gives variance  $V = \mu t$  compared to the corrected formula  $\mu t + \tau t^2$ . The uncorrected KAPZ gives an overestimate  $> 400\%$  for  $> 200$  generations. This effect can be nullified by using the mean instead of the mode, variance instead of the second moment, however failing to do so gives a large error. Furthermore other methods which assume symmetric mutations will also be inaccurate. Having estimates on the asymmetry is essential to our method because we find singular lineages by looking for asymmetry in the data. Any such anomaly needs to be significantly greater than the natural asymmetry.

**Mutation Rates as a fixed Point:** Next we compute mutation rates using 8 very large SNP groups. First, using the asymmetric constants we find singular lineages and reduce their effect. We take account of the error in the  $A_j$  by a bootstrap technique, which gives the variance for each frequency  $f(j, 0)$ . For a given SNP  $k$  if markers  $j$  started their expansion at the same time TMRCA  $T_k$  we could calculate mutation rates  $\mu_j$  via

$$(1) \quad f(j, 0) = e^{-\mu_j T_j} I_0[2T_j \sqrt{\mu_{j,-1} \mu_{j,1}}],$$

or rather average the 8 different  $\mu_j$  we would obtain. However because of branching caused by extinction of lineages the different markers do not originate at the same time but at different times  $t_j$ . In this case we expect these  $t_j$  to be randomly distributed about the log mean over a middle set of times  $t_j$ . So, for each SNP group  $k = 1, \dots, 8$  define mean time  $T_k$ , not the TMRCA but the mean log mean over a middle set of markers, which is less. We find that this is very stable. So for a fixed marker  $j$  the data  $\tau_{k,j} = t_j - T_k$  should

be randomly distributed about zero over the different SNP  $k = 1, \dots, 8$ . However the wrong choice of  $\mu_j$  would give a bias. In fact this is what we see if the mutation rates  $\mu_j = .002$  were chosen. In appendix graphs show the  $\tau_{k,j}$ ,  $k = 1, \dots, 8$  bunched around a nonzero point. Thus we try to find  $\mu_j$  so that the  $\tau_{k,j}$ ,  $k = 1, 2, \dots, 8$  has mean zero. However the  $\tau_{k,j}$ ,  $k = 1, 2, \dots, 8$  depend nonlinearly on the rates  $\mu_j$ , as does the mean  $T_k$ ,  $k = 1, \dots, 8$ . We find this nonlinear regression problem is solved by an iterative scheme which starts with any reasonable set of DNA rates, finding any reasonable choice iterates to the same final answer. So choose  $\mu_j = .002$  to begin. Suppose at some stage we have apparent mutation rates  $\mu_j$ . Then, for each SNP, and each marker we solve equation (1) to obtain the apparent  $t_j$ . For each SNP  $k = 1, \dots, 8$  we compute the mean log time  $T_k$ . At the next step we get new rates  $\mu_j^*$  from

$$f(j, 0) = e^{-\mu_j^* T_k} I_0[2T_k \sqrt{\mu_{j,-1}^* \mu_{j,1}^*}]$$

Averaging  $\mu_j^*$ ,  $k = 1, \dots, 8$  we get our next set of  $\mu_j$  of mutation rates. However this method would be effected by a marker showing a singular lineage. Fortunately these are few in number and by comparison between the different SNP we remove the outliers. We then repeat the process, computing  $T_k$  again with the new rates, and another set of mutation rates. So we have an iterative process.

One problem is that the iterates could tend to decrease to zero or increase to  $\infty$ , as we are only calculating relative rates. To prevent this we renormalize after each iteration so the total  $\sum \mu_j$  is constant. We found the iterative scheme quickly converges to a fixed set of mutation rates, unique up to a constant factor. The CI is computed by bootstrap parametrized by the uncertainties in data and the asymmetric constants.

**The generation factor  $\gamma$  :** This method does not give absolute mutation rates but *relative* mutation rates  $\mu_j \gamma$ , where  $\gamma$  is universal time scale constant. To find  $\gamma$  we apply our method to compute the  $T = TMRCA$  of three famous DNA projects and choose  $\gamma$  so the scaled  $T/\gamma$  best fits the historical record. We choose the DNA projects for the O'Niall(M222), Gp A of Macdonald (R1a1a) and Gp A of the Hamiltons (II). These are large groups with characteristic DNA and fairly accurate times of origin. Of course finding one constant  $\gamma$  from three projects is inherently more accurate than using one project to find 33 different mutation rates. Actually assuming a generation of 27years these three projects yield  $\gamma = 1$  with about 5% error, i.e. there is no actual need for this correction. This is a constant error (like uncalibrated  $^{14}C$  dating).

Thus  $\gamma$  is related to the length of a generation. Most researchers use 25yrs for  $t > 500ybp$  and 27yrs for  $t < 500ybp$ . Balesque and al used 30yrs based on Fenner [11] who sees a 30yr generation for modern hunter-gatherers. Our theory allows any nominal generation as it really doesn't matter, being included in the  $\gamma$  factor which we compute in years not generations. However to give actual mutation rates we need an actual generation so we take 27 years. This appears in our worksheet computation. Notice that choosing a 30 year generation results in a 10% increase in the quoted mutation rate. As we find our mutation rates are close to the actual rates from meiosis this means the 27 year generation is also correct.

| #    | DYS                 | Hamilton <sup>4</sup> | SD <sup>3</sup> | Burgella <sup>2</sup> | SD <sup>3</sup> | Chandler <sup>2</sup> | NIST <sup>2</sup> | FTDNA <sup>4</sup> |
|------|---------------------|-----------------------|-----------------|-----------------------|-----------------|-----------------------|-------------------|--------------------|
| 1.   | 393                 | 0.72                  | 0.14            | 1.03                  | 0.36            | 0.76                  | 0.08              | 1.43               |
| 2.   | 390                 | 2.52                  | 0.18            | 2.12                  | 0.22            | 3.11                  | 2.4               | 5.32               |
| 3.   | 19/394 <sup>1</sup> | 1.3                   | 0.52            | 2.19                  | 0.21            | 1.51                  | 2.38              | 1.45               |
| 4.   | 391                 | 4.98                  | 0.2             | 2.72                  | 0.18            | 2.65                  | 2.88              | 4.15               |
| 5.   | 385a                | 1.26                  | 0.13            |                       |                 |                       | 2.1               | 5.68               |
| 6.   | 385b <sup>1</sup>   | 3.13                  | 0.34            |                       |                 |                       | 2.1               | 5.68               |
| 7.   | 426                 | 0.07                  | 0.24            |                       |                 | 0.09                  |                   | 0.26               |
| 8.   | 388                 | 0.22                  | 0.22            | 0.42                  | 2.31            | 0.22                  |                   | 0.25               |
| 9.   | 439                 | 3.76                  | 0.11            | 5.48                  | 0.16            | 4.77                  |                   | 4.95               |
| 10.  | 389-I               | 1.93                  | 0.1             | 2.53                  | 0.21            | 1.86                  | 1.88              | 2.23               |
| 11.  | 392                 | 0.36                  | 0.27            | 0.43                  | 0.59            | 0.52                  | 0.58              | 1.59               |
| 12.  | 389b                | 2.96                  | 0.11            | 3.17                  | 0.18            | 2.42                  | 2.96              | 2.72               |
| 13.  | 458                 | 7.99                  | 0.08            | 6.88                  | 0.16            | 8.14                  | 10.8              | 6.3                |
| 14.  | 459a                | 0.39                  | 0.18            |                       |                 |                       |                   |                    |
| 15.  | 459b <sup>1</sup>   | 2.98                  | 0.47            |                       |                 |                       |                   |                    |
| 16.  | 455                 | 0.16                  | 0.21            |                       |                 | 0.16                  |                   | 0.46               |
| 17.  | 454                 | 0.11                  | 0.22            |                       |                 | 0.16                  |                   | 0.47               |
| 18.  | 447                 | 3.8                   | 0.15            | 4.56                  | 0.96            | 2.64                  |                   | 4.                 |
| 19.  | 437                 | 0.99                  | 0.18            |                       |                 | 0.99                  | 1.5               | 2.15               |
| 20.  | 448                 | 1.16                  | 0.21            |                       |                 | 1.35                  | 1.8               | 2.71               |
| 21.  | 449                 | 11.7                  | 0.14            | 18.97                 | 0.52            | 8.38                  |                   | 7.84               |
| 22.  | 460                 | 2.63                  | 0.13            | 3.82                  | 0.66            | 4.02                  |                   |                    |
| 23.  | GATAH4              | 3.93                  | 0.1             | 2.24                  | 0.44            | 2.08                  | 2.51              |                    |
| 24.  | YCA IIa             | 0.32                  | 0.23            |                       |                 |                       |                   |                    |
| 25.  | YCA IIb             | 1.4                   | 0.18            |                       |                 |                       |                   |                    |
| 26.  | 456                 | 8.1                   | 0.23            | 4.5                   | 0.21            | 7.35                  |                   |                    |
| 27.  | 607                 | 2.15                  | 0.13            |                       |                 | 4.11                  |                   | 4.1                |
| 28.  | 576                 | 10.65                 | 0.11            | 16.22                 | 0.44            | 10.22                 |                   | 10.2               |
| 29.  | 570                 | 4.6                   | 0.2             | 12.61                 | 0.52            | 7.9                   |                   | 7.9                |
| 30.  | CDYa                | 14.71                 | 0.09            |                       |                 |                       |                   | 35.3               |
| 31.  | CDYb <sup>1</sup>   | 13.4                  | 2.              |                       |                 |                       |                   | 35.3               |
| 32.  | 442                 | 2.9                   | 0.11            |                       |                 | 3.24                  |                   |                    |
| 33.  | 438                 | 0.43                  | 0.14            |                       |                 | 0.55                  | 0.7               |                    |
| Mean |                     | 3.6                   |                 | 5.3                   |                 | 3.2                   | 2.5               | 6.4                |

### Phylogenetic vs Predigree: MUTATION RATES( $\times 10^{-3}$ /generation)

Notes:

1. Too inaccurate to use
2. meiosis: Burgella uses 80 sources, Chandler uses 20
3.  $\times 100\%$  one standard deviation, i.e  $\times 2$  for 95% CI
4. phylogenetic : Reduced Singularities(Hamilton) and not(FTDNA)

| #     | DYS    | $A_j$ | SD    | SD to 0.5 |
|-------|--------|-------|-------|-----------|
| 1.    | 393    | 0.675 | 0.087 | 2.        |
| 2.    | 390    | 0.463 | 0.093 | 0.4       |
| 3.    | 19/394 | 0.973 | 0.032 | 14.7      |
| 4.    | 391    | 0.029 | 0.008 | 62.8      |
| 5.    | 385a   | 0.699 | 0.096 | 2.1       |
| 6.    | 385b   | 0.82  | 0.085 | 3.8       |
| 7.    | 426    | 0.37  | 0.232 | 0.6       |
| 8.    | 388    | 0.91  | 0.072 | 5.7       |
| 9.    | 439    | 0.734 | 0.359 | 0.7       |
| 10.   | 389-I  | 0.779 | 0.105 | 2.7       |
| 11.   | 392    | 0.954 | 0.04  | 11.2      |
| 12.   | 389b   | 0.703 | 0.325 | 0.6       |
| 13.   | 458    | 0.512 | 0.137 | 0.1       |
| 14.   | 459a   | 0.139 | 0.125 | 2.9       |
| 15.   | 459b   | 0.003 | 0.001 | 353.      |
| 16.   | 455    | 0.277 | 0.168 | 1.3       |
| 17.   | 454    | 0.962 | 0.03  | 15.4      |
| 18.   | 447    | 0.154 | 0.025 | 13.6      |
| 19.   | 437    | 0.09  | 0.09  | 4.6       |
| 20.   | 448    | 0.216 | 0.172 | 1.6       |
| 21.   | 449    | 0.518 | 0.15  | 0.1       |
| 22.   | 460    | 0.107 | 0.05  | 7.9       |
| 23.   | GATAH4 | 0.17  | 0.198 | 1.7       |
| 24.   | YCAIIa | 0.195 | 0.163 | 1.9       |
| 25.   | YCAIIb | 0.19  | 0.175 | 1.8       |
| 26.   | 456    | 0.671 | 0.416 | 0.4       |
| 27.   | 607    | 0.243 | 0.103 | 2.5       |
| 28.   | 576    | 0.387 | 0.157 | 0.7       |
| 29.   | 570    | 0.448 | 0.077 | 0.7       |
| 30.   | CDYa   | 0.37  | 0.181 | 0.7       |
| 31.   | CDYb   | 0.258 | 0.082 | 2.9       |
| 32.   | 442    | 0.603 | 0.17  | 0.6       |
| 33.   | 438    | 0.715 | 0.215 | 1.        |
| Mean* | #1-33  | 0.26* | 0.134 |           |

### Asymmetric Constants



## Complete worked example for G2a3, R1b1a2, R1a1, I1, L21, U106, J2, P312.

We use 29 markers (standard method) for G2a3, R1b1a2, R1a1, I1, L21, U106, J2, P312,  
requires running compiled functions from 29ComFun and its data file W29ComFun  
First we enter DNA file  $\delta\delta$

$\delta\delta$ ;

Each file has NN members

**NN = Table[Length[ $\delta\delta$ [[q1]]], {q1, 1, 8}]**

{1221, 460, 1270, 2898, 1029, 1533, 1241, 971}

We use asymptotic rates  $\alpha_0, \beta_0, LB$  shown

|            |            |            |            |           |          |
|------------|------------|------------|------------|-----------|----------|
| 0.674591   | 0.0869423  | 2.07306    | 0.821057   | 0.729026  | 0.39606  |
| 0.463346   | 0.0925725  | 0.863399   | 0.321435   | -0.146878 | 0.372291 |
| 0.973243   | 0.0321081  | 36.3733    | 44.8473    | 3.59383   | 1.23297  |
| 0.0290059  | 0.00750473 | 0.0298723  | 0.0079598  | -3.51082  | 0.26646  |
| 0.698661   | 0.0960793  | 2.31852    | 1.05808    | 0.840928  | 0.45636  |
| 0.820451   | 0.085011   | 4.56951    | 2.63699    | 1.51941   | 0.577084 |
| 0.369623   | 0.232259   | 0.586352   | 0.584483   | -0.533836 | 0.996814 |
| 0.909561   | 0.0716898  | 10.0572    | 8.76484    | 2.30828   | 0.871503 |
| 0.734289   | 0.359214   | 2.76349    | 5.08787    | 1.0165    | 1.8411   |
| 0.779328   | 0.105192   | 3.53162    | 2.16017    | 1.26176   | 0.611666 |
| 0.954141   | 0.0404016  | 20.8057    | 19.2106    | 3.03523   | 0.92333  |
| 0.702751   | 0.324864   | 2.36418    | 3.67672    | 0.860431  | 1.55518  |
| 0.512368   | 0.1368     | 1.05072    | 0.57531    | 0.0494802 | 0.547536 |
| 0.139428   | 0.125129   | 0.162018   | 0.16896    | -1.82005  | 1.04285  |
| 0.00301221 | 0.00140799 | 0.00302131 | 0.00141651 | -5.80206  | 0.468839 |
| 0.277241   | 0.168111   | 0.383586   | 0.321817   | -0.958191 | 0.838969 |
| 0.962441   | 0.0300025  | 25.6247    | 21.268     | 3.24356   | 0.829979 |
| 0.153578   | 0.0254353  | 0.181444   | 0.0355028  | -1.70681  | 0.195669 |
| 0.0900312  | 0.0896803  | 0.0989388  | 0.108304   | -2.31325  | 1.09465  |
| 0.216224   | 0.17223    | 0.275874   | 0.280366   | -1.28781  | 1.01628  |
| 0.518123   | 0.149878   | 1.07522    | 0.645454   | 0.0725245 | 0.6003   |
| 0.106981   | 0.049705   | 0.119797   | 0.0623274  | -2.12196  | 0.520275 |
| 0.169588   | 0.197965   | 0.204221   | 0.287079   | -1.58855  | 1.40572  |
| 0.194525   | 0.163447   | 0.241503   | 0.251925   | -1.42087  | 1.04316  |
| 0.189975   | 0.175366   | 0.23453    | 0.26727    | -1.45017  | 1.1396   |
| 0.670561   | 0.416154   | 2.03546    | 3.83445    | 0.710722  | 1.88382  |
| 0.24349    | 0.103221   | 0.32186    | 0.18036    | -1.13364  | 0.560367 |
| 0.387314   | 0.157005   | 0.632157   | 0.418251   | -0.458617 | 0.661624 |
| 0.44752    | 0.0772017  | 0.81002    | 0.252926   | -0.210696 | 0.312247 |
| 0.369712   | 0.180559   | 0.586576   | 0.454507   | -0.533454 | 0.774848 |
| 0.258428   | 0.0818945  | 0.348486   | 0.148918   | -1.05416  | 0.427329 |
| 0.602829   | 0.170338   | 1.5178     | 1.07983    | 0.417265  | 0.711442 |
| 0.714617   | 0.21496    | 2.50406    | 2.63938    | 0.917915  | 1.05404  |

**Table[1, {j, 1, 33}]; BB[j\_] := B[[j]]; BB0 = Table[1, {j, 1, 33}];**  
**PP = Table[{N[CDF[NormalDistribution[0, 1], -4 + 0.01\*j]], -4 + 0.01\*j}, {j, 0, 800}];**  
**P = Interpolation[PP];**

We bootstrap with n02 cycles

**n02 = 1000**

500

The method of reduction is applied

```

ZZ = Flatten[Table[ {ClearAll[δ0, n01, AA]; δ0 = δδ[[q1]]; n01 = Count[Flatten[δ0], _?Positive]/33;
AA = Flatten[Table[ {ClearAll[L1, δ, m0, f1, m1, m2, m3, m4, m5, m6, m, f2, f3, mm,
δ1, m10, m11, m12, m13, m14, m16, m17, m18, n, R, RR, β, μ, α, H, TS, TSS];
n = IntegerPart[n01*.5]; L1 = RandomSample[Range[n01], n]; δ = Table[δ0[[L1[[j]]]], {j, 1, n}];
m0 = Mean[δ]; m1 = Table[Commonest[Table[δ[[k, j]], {k, 1, n}]][[1]], {j, 1, 33}];
m2 = Table[m1[[j]], {i, n}, {j, 33}]; m3 = δ - m2; m4 = Abs[m3]; f2[u_] := UnitStep[u - 1];
m5 = f2[m4]; f3[j_] := N[Sum[m5[[i, j]], {i, 1, n}]/n]; m6 = Table[f3[j], {j, 1, 33}];
m = Table[Sum[m5[[i, j]]*BB0[j], {j, 33}], {i, n}]; mm = N[Sum[m[[i]], {i, n}]/n];
f1[k_] := 1 - UnitStep[Abs[k] - 0.5]; δ1 = Transpose[δ]; f2[j_, k_] :=
N[Sum[f1[δ1[[j, i]] - k], {i, 1, n}]/n]; R = RandomReal[{-0.001, .999}, 33]; RR = P[R];
β = Table[Exp[LB[[j, 1]] + LB[[j, 2]]*RR[[j]]], {j, 1, 33}];
α = Table[ $\frac{\beta[[j]]}{1 + \beta[[j]]}$ , {j, 1, 33}];
m10 = Parallelize[Table[{Max[.001, f2[j, m1[[j]] - 2], Max[.001, f2[j, m1[[j]] - 1]], Max[.001,
f2[j, m1[[j]]]}, Max[.001, f2[j, m1[[j]] + 1]], Max[.001, f2[j, m1[[j]] + 2]]}, {j, 1, 33}]];
m11 = Parallelize[Table[{Min[.999, Max[.001, β[[j]]*m10[[j, 2]]],
Min[.999, Max[.001, m10[[j, 4]]/β[[j]]]}], {j, 1, 33}]];
m12 = Parallelize[Table[{m10[[j, 4]] - m11[[j, 1]], m10[[j, 2]] - m11[[j, 2]]}, {j, 1, 33}]];
m13 = Parallelize[Table[{UnitStep[m12[[j, 1]] - .001], UnitStep[m12[[j, 2]] - .001]}, {j, 1, 33}]];
m14 = Parallelize[Table[m13[[j, 1]] - m13[[j, 2]], {j, 1, 33}]];
m15 = Parallelize[
Table[{m10[[j, 2]] - m13[[j, 2]]*m11[[j, 2]], m10[[j, 3]] - m13[[j, 1]]*m10[[j, 5]]/β[[j]] -
m13[[j, 2]]*m10[[j, 1]]*β[[j]], m10[[j, 4]] - m13[[j, 1]]*m11[[j, 1]]}, {j, 1, 33}]];
m16 = Parallelize[Table[{Min[.999, Max[.001, m15[[j, 1]]]}, Min[1, Max[.001, m15[[j, 2]]]},
Min[.999, Max[.001, m15[[j, 3]]]}], {j, 1, 33}]]; m17 = Parallelize[
Table[{m16[[j, 1]] + m16[[j, 3]]}/(m16[[j, 2]] + m16[[j, 1]] + m16[[j, 3]]), {j, 1, 33}]];
{Table[{k, m17[[k]], 1 - m10[[k, 3]], m14[[k]]}, {k, 1, 33}]}], {q2, 1, n02}], 1}], {q1, 1, 8}],
1]; MM[q_, j_] := Mean[1.0*Table[ZZ[[q, k, 1, j, 2]], {k, 1, n02}]];
MM0[q_, j_] := Mean[1.0*Table[ZZ[[q, k, 1, j, 3]], {k, 1, n02}]];
MM1[q_, j_] := Mean[1.0*Table[ZZ[[q, k, 1, j, 4]], {k, 1, n02}]];
SS[q_, j_] := (Variance[1.0*Table[ZZ[[q, k, 1, j, 2]], {k, 1, n02}]])^(.5);
SS0[q_, j_] := (Variance[1.0*Table[ZZ[[q, k, 1, j, 3]], {k, 1, n02}]])^(.5);
SS1[q_, j_] := (Variance[1.0*Table[ZZ[[q, k, 1, j, 4]], {k, 1, n02}]])^(.5);
ZZ = Table[{q, j, MM[q, j], MM0[q, j], MM1[q, j], SS[q, j], SS0[q, j], SS1[q, j]}, {q, 1, 8}, {j, 1, 33}];

```

The output is for each file (q), marker (j), reduced frequency f0, unreduced frequency f0, mean ± then SD for each

**MatrixForm[Transpose[ZZ]]**

|                                                                                                               |                                                                                                               |                                                                                                                  |                                                                                                                 |                                                                                                                   |                                                                                                                   |                                                                                                               |                                                                                                                 |
|---------------------------------------------------------------------------------------------------------------|---------------------------------------------------------------------------------------------------------------|------------------------------------------------------------------------------------------------------------------|-----------------------------------------------------------------------------------------------------------------|-------------------------------------------------------------------------------------------------------------------|-------------------------------------------------------------------------------------------------------------------|---------------------------------------------------------------------------------------------------------------|-----------------------------------------------------------------------------------------------------------------|
| $\begin{pmatrix} 1 \\ 1 \\ 0.240568 \\ 0.269364 \\ -1. \\ 0.0169099 \\ 0.012628 \\ 0. \end{pmatrix}$          | $\begin{pmatrix} 2 \\ 1 \\ 0.378642 \\ 0.40747 \\ 1. \\ 0.0262447 \\ 0.0236874 \\ 0. \end{pmatrix}$           | $\begin{pmatrix} 3 \\ 1 \\ 0.0374759 \\ 0.0610047 \\ 0.636 \\ 0.0114024 \\ 0.00673492 \\ 0.743377 \end{pmatrix}$ | $\begin{pmatrix} 4 \\ 1 \\ 0.0677803 \\ 0.118237 \\ 0.496 \\ 0.0185232 \\ 0.00584534 \\ 0.855247 \end{pmatrix}$ | $\begin{pmatrix} 5 \\ 1 \\ 0.0499991 \\ 0.0742763 \\ -0.044 \\ 0.0130415 \\ 0.00822063 \\ 0.971572 \end{pmatrix}$ | $\begin{pmatrix} 6 \\ 1 \\ 0.0539756 \\ 0.0832689 \\ -0.698 \\ 0.00951583 \\ 0.00717443 \\ 0.70127 \end{pmatrix}$ | $\begin{pmatrix} 7 \\ 1 \\ 0.0991811 \\ 0.113655 \\ 1. \\ 0.00963654 \\ 0.0086332 \\ 0. \end{pmatrix}$        | $\begin{pmatrix} 8 \\ 1 \\ 0.0718497 \\ 0.10812 \\ -0.428 \\ 0.0149407 \\ 0.00993305 \\ 0.886786 \end{pmatrix}$ |
| $\begin{pmatrix} 1 \\ 2 \\ 0.107158 \\ 0.166213 \\ 0.718 \\ 0.0169463 \\ 0.0111266 \\ 0.686599 \end{pmatrix}$ | $\begin{pmatrix} 2 \\ 2 \\ 0.218969 \\ 0.326591 \\ 0.25 \\ 0.0305233 \\ 0.0214128 \\ 0.964033 \end{pmatrix}$  | $\begin{pmatrix} 3 \\ 2 \\ 0.186691 \\ 0.283934 \\ -0.874 \\ 0.0323346 \\ 0.0125019 \\ 0.484348 \end{pmatrix}$   | $\begin{pmatrix} 4 \\ 2 \\ 0.365616 \\ 0.375769 \\ 1. \\ 0.0100439 \\ 0.00858139 \\ 0. \end{pmatrix}$           | $\begin{pmatrix} 5 \\ 2 \\ 0.175806 \\ 0.257494 \\ 0.824 \\ 0.0248054 \\ 0.0133938 \\ 0.563613 \end{pmatrix}$     | $\begin{pmatrix} 6 \\ 2 \\ 0.416697 \\ 0.445901 \\ 1. \\ 0.0352365 \\ 0.0128488 \\ 0. \end{pmatrix}$              | $\begin{pmatrix} 7 \\ 2 \\ 0.346812 \\ 0.4492 \\ 0.978 \\ 0.0549321 \\ 0.0145731 \\ 0.203959 \end{pmatrix}$   | $\begin{pmatrix} 8 \\ 2 \\ 0.190096 \\ 0.278878 \\ -0.12 \\ 0.0256537 \\ 0.0148428 \\ 0.985669 \end{pmatrix}$   |
| $\begin{pmatrix} 1 \\ 3 \\ 0.131797 \\ 0.1302 \\ -0.962 \\ 0.054478 \\ 0.0098552 \\ 0.269632 \end{pmatrix}$   | $\begin{pmatrix} 2 \\ 3 \\ 0.263675 \\ 0.133226 \\ -0.938 \\ 0.283173 \\ 0.0156641 \\ 0.344083 \end{pmatrix}$ | $\begin{pmatrix} 3 \\ 3 \\ 0.801196 \\ 0.546872 \\ -1. \\ 0.179535 \\ 0.0132677 \\ 0. \end{pmatrix}$             | $\begin{pmatrix} 4 \\ 3 \\ 0.186832 \\ 0.212102 \\ -0.474 \\ 0.0906656 \\ 0.0076426 \\ 0.866502 \end{pmatrix}$  | $\begin{pmatrix} 5 \\ 3 \\ 0.0994786 \\ 0.110642 \\ -0.306 \\ 0.0643143 \\ 0.00948744 \\ 0.899991 \end{pmatrix}$  | $\begin{pmatrix} 6 \\ 3 \\ 0.0888585 \\ 0.0876527 \\ -0.632 \\ 0.0656185 \\ 0.00738005 \\ 0.754795 \end{pmatrix}$ | $\begin{pmatrix} 7 \\ 3 \\ 0.411807 \\ 0.455342 \\ -0.228 \\ 0.153207 \\ 0.0144856 \\ 0.958046 \end{pmatrix}$ | $\begin{pmatrix} 8 \\ 3 \\ 0.180623 \\ 0.145204 \\ -0.734 \\ 0.164194 \\ 0.0109657 \\ 0.669433 \end{pmatrix}$   |
| $\begin{pmatrix} 1 \\ 4 \\ 0.102029 \\ 0.103105 \\ 1. \end{pmatrix}$                                          | $\begin{pmatrix} 2 \\ 4 \\ 0.418723 \\ 0.369365 \\ 0.896 \end{pmatrix}$                                       | $\begin{pmatrix} 3 \\ 4 \\ 0.570449 \\ 0.498841 \\ 0.8 \end{pmatrix}$                                            | $\begin{pmatrix} 4 \\ 4 \\ 0.095267 \\ 0.0929137 \\ 1. \end{pmatrix}$                                           | $\begin{pmatrix} 5 \\ 4 \\ 0.446937 \\ 0.433887 \\ 1. \end{pmatrix}$                                              | $\begin{pmatrix} 6 \\ 4 \\ 0.379255 \\ 0.351585 \\ 1. \end{pmatrix}$                                              | $\begin{pmatrix} 7 \\ 4 \\ 0.229267 \\ 0.219494 \\ 1. \end{pmatrix}$                                          | $\begin{pmatrix} 8 \\ 4 \\ 0.415773 \\ 0.342025 \\ 1. \end{pmatrix}$                                            |

|            |            |            |            |            |            |            |            |
|------------|------------|------------|------------|------------|------------|------------|------------|
| 0.00984282 | 0.101791   | 0.222405   | 0.00585526 | 0.0208061  | 0.0272052  | 0.0159411  | 0.0739681  |
| 0.00863333 | 0.0215263  | 0.010672   | 0.00532949 | 0.0157913  | 0.012578   | 0.011802   | 0.0152697  |
| 0.         | 0.430761   | 0.583679   | 0.         | 0.         | 0.         | 0.         | 0.         |
| 1          | 2          | 3          | 4          | 5          | 6          | 7          | 8          |
| 5          | 5          | 5          | 5          | 5          | 5          | 5          | 5          |
| 0.372932   | 0.156555   | 0.129462   | 0.343645   | 0.0722556  | 0.0668929  | 0.330999   | 0.105297   |
| 0.3452     | 0.23133    | 0.167666   | 0.424041   | 0.129498   | 0.103789   | 0.494113   | 0.174994   |
| -1.        | 0.988      | -0.978     | 1.         | 0.172      | -0.118     | 0.07       | 0.262      |
| 0.156192   | 0.0320991  | 0.016276   | 0.0395333  | 0.0211701  | 0.0167502  | 0.0671302  | 0.0301616  |
| 0.0137091  | 0.0194653  | 0.0100024  | 0.00915119 | 0.0103202  | 0.00806894 | 0.0142692  | 0.0120112  |
| 0.         | 0.154609   | 0.203959   | 0.         | 0.969689   | 0.976721   | 0.995531   | 0.952455   |
| 1          | 2          | 3          | 4          | 5          | 6          | 7          | 8          |
| 6          | 6          | 6          | 6          | 6          | 6          | 6          | 6          |
| 0.303214   | 0.310065   | 0.195828   | 0.230686   | 0.228629   | 0.191401   | 0.881276   | 0.246809   |
| 0.451843   | 0.413896   | 0.255685   | 0.313384   | 0.334957   | 0.252157   | 0.697429   | 0.320685   |
| 0.89       | -0.24      | -0.694     | -0.346     | -0.108     | -0.812     | -0.932     | -0.704     |
| 0.0775789  | 0.109212   | 0.0376006  | 0.0586784  | 0.0790634  | 0.0379511  | 0.1483     | 0.0524204  |
| 0.014807   | 0.0234281  | 0.0127067  | 0.0084827  | 0.0149095  | 0.0109063  | 0.0112583  | 0.0151201  |
| 0.440782   | 0.965538   | 0.716513   | 0.933824   | 0.985026   | 0.577341   | 0.357255   | 0.708087   |
| 1          | 2          | 3          | 4          | 5          | 6          | 7          | 8          |
| 7          | 7          | 7          | 7          | 7          | 7          | 7          | 7          |
| 0.0049278  | 0.138349   | 0.0139767  | 0.0035918  | 0.0171963  | 0.0126407  | 0.00848146 | 0.00717218 |
| 0.00581639 | 0.176626   | 0.0174929  | 0.00435611 | 0.0221946  | 0.0156606  | 0.011029   | 0.0121938  |
| -0.372     | 0.286      | 0.306      | -0.458     | 0.616      | 0.624      | 0.608      | 0.768      |
| 0.00161293 | 0.0258992  | 0.00357312 | 0.00103036 | 0.00490497 | 0.00326455 | 0.00254619 | 0.00252049 |
| 0.00202028 | 0.0177634  | 0.00353908 | 0.00127954 | 0.00480104 | 0.00323704 | 0.00293991 | 0.00350903 |
| 0.69179    | 0.951849   | 0.913254   | 0.555746   | 0.746766   | 0.740081   | 0.712286   | 0.553886   |
| 1          | 2          | 3          | 4          | 5          | 6          | 7          | 8          |
| 8          | 8          | 8          | 8          | 8          | 8          | 8          | 8          |
| 0.382711   | 0.0414717  | 0.121485   | 0.0523867  | 0.0113426  | 0.0117869  | 0.473713   | 0.0171688  |
| 0.377426   | 0.0454261  | 0.0683654  | 0.103204   | 0.0223035  | 0.0224752  | 0.368171   | 0.0349732  |
| -1.        | -0.888     | -0.084     | -0.536     | 0.59       | 0.324      | -0.788     | 0.76       |
| 0.016235   | 0.0120193  | 0.279873   | 0.0144323  | 0.00471267 | 0.0046887  | 0.23988    | 0.00675708 |
| 0.0137072  | 0.00982407 | 0.00687747 | 0.00531027 | 0.00451239 | 0.00385478 | 0.0131675  | 0.00595632 |
| 0.         | 0.442547   | 0.82359    | 0.821007   | 0.492326   | 0.68991    | 0.609754   | 0.427511   |
| 1          | 2          | 3          | 4          | 5          | 6          | 7          | 8          |
| 9          | 9          | 9          | 9          | 9          | 9          | 9          | 9          |
| 0.353073   | 0.355654   | 0.304021   | 0.18749    | 0.439431   | 0.387134   | 0.523378   | 0.406941   |
| 0.376085   | 0.36793    | 0.312794   | 0.224167   | 0.415685   | 0.403997   | 0.54249    | 0.397353   |
| 0.448      | -0.344     | 0.966      | 0.112      | -0.578     | -0.704     | 0.474      | -0.59      |
| 0.187036   | 0.133936   | 0.143399   | 0.084994   | 0.184245   | 0.1141     | 0.188248   | 0.164548   |
| 0.0133885  | 0.0221195  | 0.0126467  | 0.00737327 | 0.0153443  | 0.0128111  | 0.0137912  | 0.0159068  |
| 0.892687   | 0.937775   | 0.211976   | 0.990666   | 0.815626   | 0.710911   | 0.87799    | 0.806971   |
| 1          | 2          | 3          | 4          | 5          | 6          | 7          | 8          |
| 10         | 10         | 10         | 10         | 10         | 10         | 10         | 10         |
| 0.0713628  | 0.170909   | 0.153777   | 0.077468   | 0.117344   | 0.118668   | 0.397436   | 0.226436   |
| 0.118957   | 0.207687   | 0.232696   | 0.101213   | 0.171879   | 0.154371   | 0.441635   | 0.270825   |
| 0.858      | -0.876     | 0.698      | 0.99       | 0.254      | -0.47      | -0.978     | -0.812     |
| 0.0211065  | 0.0276348  | 0.0465147  | 0.0146727  | 0.0376701  | 0.0299822  | 0.0307026  | 0.0299138  |
| 0.00911389 | 0.0188094  | 0.0121851  | 0.0058851  | 0.0118820  | 0.00946882 | 0.0138265  | 0.0140673  |
| 0.492261   | 0.482794   | 0.70127    | 0.118016   | 0.950416   | 0.873284   | 0.203959   | 0.580802   |
| 1          | 2          | 3          | 4          | 5          | 6          | 7          | 8          |
| 11         | 11         | 11         | 11         | 11         | 11         | 11         | 11         |
| 0.0328995  | 0.195605   | 0.019464   | 0.0276099  | 0.0913281  | 0.0545896  | 0.0428634  | 0.0458454  |
| 0.035023   | 0.226243   | 0.0274583  | 0.0344444  | 0.086249   | 0.0604282  | 0.0473323  | 0.0549237  |
| -1.        | -0.556     | -0.19      | -0.404     | -0.622     | -0.896     | -0.682     | -0.744     |
| 0.00559746 | 0.0547398  | 0.00671988 | 0.0102913  | 0.105592   | 0.0146441  | 0.0109744  | 0.0114476  |
| 0.00518393 | 0.0206381  | 0.00482019 | 0.0033436  | 0.008516   | 0.00593477 | 0.00584676 | 0.00723343 |
| 0.         | 0.822324   | 0.760959   | 0.811234   | 0.753825   | 0.435388   | 0.688348   | 0.631872   |
| 1          | 2          | 3          | 4          | 5          | 6          | 7          | 8          |
| 12         | 12         | 12         | 12         | 12         | 12         | 12         | 12         |
| 0.339109   | 0.319741   | 0.361585   | 0.14143    | 0.229618   | 0.201784   | 0.383215   | 0.172139   |
| 0.350852   | 0.361217   | 0.395468   | 0.181101   | 0.279381   | 0.243068   | 0.435403   | 0.210062   |
| -0.44      | -0.49      | -0.532     | 0.468      | 0.588      | -0.404     | 0.536      | 0.338      |
| 0.135645   | 0.0802929  | 0.0814271  | 0.0359787  | 0.0625503  | 0.037088   | 0.145978   | 0.0647567  |
| 0.0137165  | 0.0236567  | 0.0139621  | 0.00675153 | 0.0135278  | 0.0112598  | 0.0137106  | 0.0136602  |
| 0.898897   | 0.871446   | 0.847592   | 0.875505   | 0.807192   | 0.913484   | 0.837919   | 0.938892   |
| 1          | 2          | 3          | 4          | 5          | 6          | 7          | 8          |
| 13         | 13         | 13         | 13         | 13         | 13         | 13         | 13         |
| 0.476577   | 0.54595    | 0.360548   | 0.274225   | 0.365821   | 0.393367   | 0.707439   | 0.364524   |
| 0.57322    | 0.608843   | 0.465093   | 0.382658   | 0.485257   | 0.515504   | 0.718939   | 0.488829   |
| 0.9        | 0.784      | 0.928      | 0.75       | 0.288      | 0.186      | -0.344     | 0.164      |
| 0.132784   | 0.119895   | 0.0780383  | 0.0472547  | 0.0524781  | 0.0591396  | 0.172361   | 0.0548065  |
| 0.0138668  | 0.0217439  | 0.0135952  | 0.00890805 | 0.0153576  | 0.0126115  | 0.0104027  | 0.0164223  |
| 0.431709   | 0.621382   | 0.367541   | 0.657544   | 0.952297   | 0.980472   | 0.935636   | 0.983381   |





|            |           |            |            |            |            |            |            |
|------------|-----------|------------|------------|------------|------------|------------|------------|
| 0.328663   | 0.484439  | 0.613505   | 0.136682   | 0.262803   | 0.334175   | 0.517864   | 0.289208   |
| 0.388374   | 0.413835  | 0.447087   | 0.151159   | 0.288868   | 0.367995   | 0.420974   | 0.345324   |
| -0.16      | 0.908     | 0.978      | 0.558      | 0.72       | -0.136     | 0.976      | 0.064      |
| 0.0788466  | 0.201053  | 0.234179   | 0.0614367  | 0.0465338  | 0.130912   | 0.211129   | 0.0651582  |
| 0.014047   | 0.0233485 | 0.0139081  | 0.00663136 | 0.0143292  | 0.0126484  | 0.0134849  | 0.0142894  |
| 0.984041   | 0.41939   | 0.203959   | 0.829465   | 0.691778   | 0.989678   | 0.217989   | 0.992913   |
| 1          | 2         | 3          | 4          | 5          | 6          | 7          | 8          |
| 24         | 24        | 24         | 24         | 24         | 24         | 24         | 24         |
| 0.219455   | 0.0369204 | 0.0152541  | 0.0638566  | 0.0171383  | 0.0248498  | 0.0720283  | 0.0295387  |
| 0.235295   | 0.069513  | 0.0378992  | 0.0598634  | 0.0415019  | 0.0486919  | 0.0996452  | 0.0468041  |
| -1.        | 0.244     | 0.678      | 0.752      | 0.79       | 0.578      | 0.87       | 0.986      |
| 0.0155442  | 0.018623  | 0.00452604 | 0.172969   | 0.00447098 | 0.0424478  | 0.136715   | 0.00621069 |
| 0.0120083  | 0.012282  | 0.00516938 | 0.00426184 | 0.00603961 | 0.00531804 | 0.00839916 | 0.00696065 |
| 0.         | 0.945649  | 0.686483   | 0.635061   | 0.57842    | 0.780471   | 0.487417   | 0.160797   |
| 1          | 2         | 3          | 4          | 5          | 6          | 7          | 8          |
| 25         | 25        | 25         | 25         | 25         | 25         | 25         | 25         |
| 0.131858   | 0.0628114 | 0.10563    | 0.0300541  | 0.168405   | 0.10801    | 0.218778   | 0.0688693  |
| 0.124787   | 0.111183  | 0.239975   | 0.0543092  | 0.24521    | 0.159008   | 0.357068   | 0.11854    |
| 1.         | -0.214    | 0.44       | 0.636      | 0.964      | 0.48       | 0.694      | 0.178      |
| 0.0736288  | 0.0214409 | 0.0490273  | 0.00599343 | 0.0265341  | 0.0206309  | 0.14743    | 0.0198778  |
| 0.00950662 | 0.0144692 | 0.0117806  | 0.00425068 | 0.0141066  | 0.0088233  | 0.0127892  | 0.0102737  |
| 0.         | 0.958144  | 0.894427   | 0.754083   | 0.266169   | 0.871274   | 0.719304   | 0.971702   |
| 1          | 2         | 3          | 4          | 5          | 6          | 7          | 8          |
| 26         | 26        | 26         | 26         | 26         | 26         | 26         | 26         |
| 0.277956   | 0.566391  | 0.666728   | 0.258531   | 0.604548   | 0.634763   | 0.692447   | 0.551759   |
| 0.297197   | 0.545261  | 0.550838   | 0.288937   | 0.566128   | 0.607274   | 0.513839   | 0.514961   |
| -0.016     | 0.604     | -0.472     | 0.278      | 0.326      | -0.386     | -0.03      | -0.724     |
| 0.159479   | 0.225086  | 0.215994   | 0.120512   | 0.217965   | 0.162283   | 0.303584   | 0.178355   |
| 0.0125865  | 0.0218017 | 0.0143382  | 0.00863337 | 0.0106792  | 0.0117671  | 0.013866   | 0.015124   |
| 0.994848   | 0.795267  | 0.882481   | 0.958412   | 0.943135   | 0.922337   | 0.999549   | 0.690491   |
| 1          | 2         | 3          | 4          | 5          | 6          | 7          | 8          |
| 27         | 27        | 27         | 27         | 27         | 27         | 27         | 27         |
| 0.286284   | 0.608988  | 0.28787    | 0.162825   | 0.1891     | 0.154815   | 0.368795   | 0.164774   |
| 0.294561   | 0.482243  | 0.388139   | 0.18405    | 0.230424   | 0.207496   | 0.437671   | 0.208697   |
| 1.         | 1.        | 0.062      | 0.998      | 0.842      | 0.478      | 0.808      | 0.778      |
| 0.063518   | 0.159259  | 0.0677377  | 0.0162894  | 0.0290734  | 0.0333481  | 0.0664925  | 0.025518   |
| 0.013628   | 0.0255695 | 0.0131939  | 0.00704146 | 0.0128253  | 0.010046   | 0.0137427  | 0.0126028  |
| 0.         | 0.        | 0.994048   | 0.0447214  | 0.530659   | 0.871226   | 0.589773   | 0.620876   |
| 1          | 2         | 3          | 4          | 5          | 6          | 7          | 8          |
| 28         | 28        | 28         | 28         | 28         | 28         | 28         | 28         |
| 0.83791    | 0.614269  | 0.546978   | 0.498689   | 0.514985   | 0.589598   | 0.797234   | 0.59548    |
| 0.706593   | 0.636461  | 0.611723   | 0.490482   | 0.555416   | 0.562514   | 0.715077   | 0.601464   |
| 0.556      | 0.118     | 0.074      | 0.984      | 0.626      | 0.974      | 0.276      | 0.386      |
| 0.217444   | 0.166543  | 0.107976   | 0.153556   | 0.132832   | 0.167211   | 0.191571   | 0.169624   |
| 0.0132721  | 0.0208401 | 0.0139947  | 0.00914276 | 0.0158623  | 0.0125803  | 0.0104357  | 0.0160432  |
| 0.829603   | 0.990979  | 0.995241   | 0.178347   | 0.776744   | 0.222312   | 0.960035   | 0.922337   |
| 1          | 2         | 3          | 4          | 5          | 6          | 7          | 8          |
| 29         | 29        | 29         | 29         | 29         | 29         | 29         | 29         |
| 0.438918   | 0.355845  | 0.469487   | 0.747729   | 0.29653    | 0.390903   | 0.589925   | 0.382068   |
| 0.5892     | 0.454304  | 0.608214   | 0.705874   | 0.42423    | 0.475603   | 0.692116   | 0.486054   |
| -0.812     | 0.994     | 0.068      | 0.796      | 0.69       | 0.996      | 0.46       | 0.844      |
| 0.0571279  | 0.0491678 | 0.055929   | 0.139441   | 0.0449352  | 0.0538673  | 0.0800382  | 0.0506122  |
| 0.0140239  | 0.023837  | 0.0146114  | 0.00807017 | 0.0159087  | 0.012604   | 0.012702   | 0.0156915  |
| 0.584242   | 0.0999198 | 0.994663   | 0.605903   | 0.717586   | 0.0894427  | 0.882018   | 0.529362   |
| 1          | 2         | 3          | 4          | 5          | 6          | 7          | 8          |
| 30         | 30        | 30         | 30         | 30         | 30         | 30         | 30         |
| 0.697219   | 0.815209  | 0.701099   | 0.585507   | 0.743338   | 0.613878   | 0.882958   | 0.746186   |
| 0.699226   | 0.714165  | 0.624233   | 0.591463   | 0.659735   | 0.664131   | 0.766516   | 0.663184   |
| 0.25       | 0.498     | 0.916      | 0.592      | 0.878      | -0.114     | 0.65       | 0.684      |
| 0.169178   | 0.166093  | 0.206957   | 0.159319   | 0.196214   | 0.157615   | 0.151472   | 0.184962   |
| 0.0120361  | 0.0189024 | 0.0140891  | 0.00926066 | 0.0148317  | 0.0106129  | 0.00964158 | 0.0159221  |
| 0.968181   | 0.86689   | 0.396558   | 0.804257   | 0.477044   | 0.991448   | 0.759377   | 0.730213   |
| 1          | 2         | 3          | 4          | 5          | 6          | 7          | 8          |
| 31         | 31        | 31         | 31         | 31         | 31         | 31         | 31         |
| 0.980267   | 0.820739  | 0.978582   | 0.858941   | 0.886215   | 0.846092   | 0.874355   | 0.807889   |
| 0.762521   | 0.695287  | 0.729701   | 0.696047   | 0.68023    | 0.666995   | 0.760023   | 0.677703   |
| 0.988      | 0.8       | 0.996      | 0.968      | 0.948      | 0.98       | 0.942      | 0.89       |
| 0.0571064  | 0.180458  | 0.0618665  | 0.134941   | 0.144913   | 0.140732   | 0.131328   | 0.170598   |
| 0.00922038 | 0.0167097 | 0.0122011  | 0.00900586 | 0.0143748  | 0.0118126  | 0.0121757  | 0.0152389  |
| 0.154609   | 0.597255  | 0.0894427  | 0.251202   | 0.318589   | 0.199197   | 0.332953   | 0.454216   |
| 1          | 2         | 3          | 4          | 5          | 6          | 7          | 8          |
| 32         | 32        | 32         | 32         | 32         | 32         | 32         | 32         |
| 0.152614   | 0.19472   | 0.699889   | 0.169919   | 0.171173   | 0.240949   | 0.452412   | 0.179728   |
| 0.201269   | 0.257591  | 0.654076   | 0.231429   | 0.234556   | 0.331399   | 0.544745   | 0.246346   |
| 0.022      | 0.672     | 0.888      | 0.35       | 0.286      | 0.088      | 0.018      | 0.422      |

|           |           |            |            |            |            |            |            |
|-----------|-----------|------------|------------|------------|------------|------------|------------|
| 0.222     | -0.072    | 0.188      | -0.155     | -0.288     | -0.088     | 0.118      | -0.122     |
| 0.0288794 | 0.039516  | 0.205955   | 0.0248729  | 0.0263694  | 0.0351946  | 0.0860289  | 0.0277084  |
| 0.0123298 | 0.0209075 | 0.0133831  | 0.00799638 | 0.013087   | 0.0116574  | 0.0144251  | 0.0137949  |
| 0.384984  | 0.738584  | 0.154609   | 0.93233    | 0.958144   | 0.99309    | 0.394445   | 0.904185   |
| 1         | 2         | 3          | 4          | 5          | 6          | 7          | 8          |
| 33        | 33        | 33         | 33         | 33         | 33         | 33         | 33         |
| 0.0510223 | 0.063852  | 0.0412005  | 0.0246973  | 0.030431   | 0.0648421  | 0.0535717  | 0.0329089  |
| 0.0710164 | 0.0863391 | 0.059537   | 0.032697   | 0.0424008  | 0.0777728  | 0.0801452  | 0.0482557  |
| 0.8       | -0.304    | -0.078     | -0.464     | -0.354     | -0.962     | 0.712      | -0.272     |
| 0.0145717 | 0.0165081 | 0.0105283  | 0.00485418 | 0.00755017 | 0.0116778  | 0.0409857  | 0.00864755 |
| 0.0073346 | 0.0130492 | 0.00648817 | 0.00331646 | 0.00622569 | 0.00626831 | 0.00763957 | 0.007195   |
| 0.590506  | 0.945183  | 0.980734   | 0.873057   | 0.917806   | 0.254333   | 0.685563   | 0.935825   |

We conservatively weight the reduction by mean ±

$ZZZ = \text{Table}[\{q1, k, \text{Abs}[ZZ[[q1, k, 5]]] * ZZ[[q1, k, 3]] + (1 - \text{Abs}[ZZ[[q1, k, 5]]) * ZZ[[q1, k, 4]]\}, \{q1, 1, 8\}, \{k, 1, 33\}];$

$\text{MatrixForm}[\text{Transpose}[ZZZ]]$

|            |           |           |            |            |           |            |           |
|------------|-----------|-----------|------------|------------|-----------|------------|-----------|
| 1          | 2         | 3         | 4          | 5          | 6         | 7          | 8         |
| 0.240568   | 0.378642  | 0.0460404 | 0.0932107  | 0.0732081  | 0.0628222 | 0.0991811  | 0.0925961 |
| 1          | 2         | 3         | 4          | 5          | 6         | 7          | 8         |
| 0.123812   | 0.299686  | 0.198944  | 0.365616   | 0.190183   | 0.416697  | 0.349065   | 0.268225  |
| 1          | 2         | 3         | 4          | 5          | 6         | 7          | 8         |
| 0.131736   | 0.255587  | 0.801196  | 0.200124   | 0.107226   | 0.0884148 | 0.445416   | 0.171202  |
| 1          | 2         | 3         | 4          | 5          | 6         | 7          | 8         |
| 0.102029   | 0.413589  | 0.556128  | 0.095267   | 0.446937   | 0.379255  | 0.229267   | 0.415773  |
| 1          | 2         | 3         | 4          | 5          | 6         | 7          | 8         |
| 0.372932   | 0.157453  | 0.130303  | 0.343645   | 0.119652   | 0.0994348 | 0.482695   | 0.156733  |
| 1          | 2         | 3         | 4          | 5          | 6         | 7          | 8         |
| 0.319564   | 0.388976  | 0.214144  | 0.284771   | 0.323474   | 0.202823  | 0.868774   | 0.268676  |
| 1          | 2         | 3         | 4          | 5          | 6         | 7          | 8         |
| 0.00548584 | 0.165679  | 0.0164169 | 0.00400606 | 0.0191156  | 0.0137762 | 0.00948011 | 0.0083372 |
| 1          | 2         | 3         | 4          | 5          | 6         | 7          | 8         |
| 0.382711   | 0.0419145 | 0.0728274 | 0.0759657  | 0.0158366  | 0.0190122 | 0.451338   | 0.0214419 |
| 1          | 2         | 3         | 4          | 5          | 6         | 7          | 8         |
| 0.365776   | 0.363707  | 0.304319  | 0.220059   | 0.42941    | 0.392126  | 0.533431   | 0.40301   |
| 1          | 2         | 3         | 4          | 5          | 6         | 7          | 8         |
| 0.0781212  | 0.17547   | 0.177611  | 0.0777054  | 0.158027   | 0.13759   | 0.398409   | 0.234781  |
| 1          | 2         | 3         | 4          | 5          | 6         | 7          | 8         |
| 0.0328995  | 0.209208  | 0.0259394 | 0.0316833  | 0.0894082  | 0.0551968 | 0.0442845  | 0.0481694 |
| 1          | 2         | 3         | 4          | 5          | 6         | 7          | 8         |
| 0.345685   | 0.340894  | 0.377442  | 0.162535   | 0.250121   | 0.226389  | 0.40743    | 0.197244  |
| 1          | 2         | 3         | 4          | 5          | 6         | 7          | 8         |
| 0.486242   | 0.559535  | 0.368076  | 0.301333   | 0.450859   | 0.492786  | 0.714983   | 0.468443  |
| 1          | 2         | 3         | 4          | 5          | 6         | 7          | 8         |
| 0.0625268  | 0.0578194 | 0.0439464 | 0.0603938  | 0.033558   | 0.0217329 | 0.466772   | 0.0465872 |
| 1          | 2         | 3         | 4          | 5          | 6         | 7          | 8         |
| 0.136723   | 0.364529  | 0.33634   | 0.0644196  | 0.247103   | 0.260968  | 0.136782   | 0.379563  |
| 1          | 2         | 3         | 4          | 5          | 6         | 7          | 8         |
| 0.0263737  | 0.022276  | 0.0212382 | 0.0096757  | 0.0267175  | 0.020522  | 0.043924   | 0.017078  |
| 1          | 2         | 3         | 4          | 5          | 6         | 7          | 8         |
| 0.0544076  | 0.0128674 | 0.0184817 | 0.0120678  | 0.00987666 | 0.01274   | 0.104481   | 0.0238311 |
| 1          | 2         | 3         | 4          | 5          | 6         | 7          | 8         |
| 0.254561   | 0.293814  | 0.53043   | 0.320815   | 0.283906   | 0.483259  | 0.92366    | 0.317199  |

|           |           |            |           |           |           |           |           |
|-----------|-----------|------------|-----------|-----------|-----------|-----------|-----------|
| 1         | 2         | 3          | 4         | 5         | 6         | 7         | 8         |
| 19        | 19        | 19         | 19        | 19        | 19        | 19        | 19        |
| 0.0989285 | 0.136702  | 0.00751669 | 0.0569382 | 0.104299  | 0.131371  | 0.459147  | 0.279902  |
| 1         | 2         | 3          | 4         | 5         | 6         | 7         | 8         |
| 20        | 20        | 20         | 20        | 20        | 20        | 20        | 20        |
| 0.310802  | 0.121492  | 0.130127   | 0.102065  | 0.132577  | 0.0620208 | 0.714039  | 0.297177  |
| 1         | 2         | 3          | 4         | 5         | 6         | 7         | 8         |
| 21        | 21        | 21         | 21        | 21        | 21        | 21        | 21        |
| 0.702365  | 0.657082  | 0.59161    | 0.525662  | 0.629305  | 0.521285  | 0.772144  | 0.456457  |
| 1         | 2         | 3          | 4         | 5         | 6         | 7         | 8         |
| 22        | 22        | 22         | 22        | 22        | 22        | 22        | 22        |
| 0.553821  | 0.283391  | 0.254349   | 0.272732  | 0.206443  | 0.245897  | 0.656476  | 0.278451  |
| 1         | 2         | 3          | 4         | 5         | 6         | 7         | 8         |
| 23        | 23        | 23         | 23        | 23        | 23        | 23        | 23        |
| 0.37882   | 0.477944  | 0.609844   | 0.143081  | 0.270101  | 0.363395  | 0.515539  | 0.341732  |
| 1         | 2         | 3          | 4         | 5         | 6         | 7         | 8         |
| 24        | 24        | 24         | 24        | 24        | 24        | 24        | 24        |
| 0.219455  | 0.0615604 | 0.0225459  | 0.0628663 | 0.0222547 | 0.0349112 | 0.0756185 | 0.0297804 |
| 1         | 2         | 3          | 4         | 5         | 6         | 7         | 8         |
| 25        | 25        | 25         | 25        | 25        | 25        | 25        | 25        |
| 0.131858  | 0.100831  | 0.180863   | 0.0388829 | 0.17117   | 0.134529  | 0.261095  | 0.109699  |
| 1         | 2         | 3          | 4         | 5         | 6         | 7         | 8         |
| 26        | 26        | 26         | 26        | 26        | 26        | 26        | 26        |
| 0.296889  | 0.558024  | 0.605538   | 0.280484  | 0.578653  | 0.617885  | 0.519197  | 0.541603  |
| 1         | 2         | 3          | 4         | 5         | 6         | 7         | 8         |
| 27        | 27        | 27         | 27        | 27        | 27        | 27        | 27        |
| 0.286284  | 0.608988  | 0.381922   | 0.162868  | 0.195629  | 0.182315  | 0.382019  | 0.174525  |
| 1         | 2         | 3          | 4         | 5         | 6         | 7         | 8         |
| 28        | 28        | 28         | 28        | 28        | 28        | 28        | 28        |
| 0.779605  | 0.633842  | 0.606932   | 0.498558  | 0.530106  | 0.588894  | 0.737753  | 0.599154  |
| 1         | 2         | 3          | 4         | 5         | 6         | 7         | 8         |
| 29        | 29        | 29         | 29        | 29        | 29        | 29        | 29        |
| 0.467171  | 0.356435  | 0.598781   | 0.73919   | 0.336117  | 0.391241  | 0.645108  | 0.39829   |
| 1         | 2         | 3          | 4         | 5         | 6         | 7         | 8         |
| 30        | 30        | 30         | 30        | 30        | 30        | 30        | 30        |
| 0.698725  | 0.764485  | 0.694642   | 0.587937  | 0.733139  | 0.658402  | 0.842203  | 0.719957  |
| 1         | 2         | 3          | 4         | 5         | 6         | 7         | 8         |
| 31        | 31        | 31         | 31        | 31        | 31        | 31        | 31        |
| 0.977654  | 0.795649  | 0.977587   | 0.853728  | 0.875504  | 0.84251   | 0.867723  | 0.793569  |
| 1         | 2         | 3          | 4         | 5         | 6         | 7         | 8         |
| 32        | 32        | 32         | 32        | 32        | 32        | 32        | 32        |
| 0.156409  | 0.215342  | 0.699339   | 0.2099    | 0.216429  | 0.32344   | 0.459983  | 0.218233  |
| 1         | 2         | 3          | 4         | 5         | 6         | 7         | 8         |
| 33        | 33        | 33         | 33        | 33        | 33        | 33        | 33        |
| 0.0550211 | 0.079503  | 0.0581068  | 0.0289851 | 0.0381635 | 0.0653334 | 0.0612248 | 0.0440814 |

This has SD

```

ZZS = Table[ ((Abs[ZZ[[q1, k, 5]]]*ZZ[[q1, k, 6]]^2 + ZZ[[q1, k, 3]]^2) +
(1 - Abs[ZZ[[q1, k, 5]]])*ZZ[[q1, k, 7]]^2 + ZZ[[q1, k, 4]]^2) -
(Abs[ZZ[[q1, k, 5]]]*ZZ[[q1, k, 3]] + (1 - Abs[ZZ[[q1, k, 5]]])*ZZ[[q1, k, 4]]^2)
^ (.5), {q1, 1, 8}, {k, 1, 33} ]

```

MatrixForm[ Transpose[ZZS]]

|            |            |            |            |            |            |            |            |
|------------|------------|------------|------------|------------|------------|------------|------------|
| 0.0169099  | 0.0262447  | 0.0150785  | 0.0287026  | 0.00984279 | 0.0161131  | 0.00963654 | 0.0217723  |
| 0.0307772  | 0.0524265  | 0.044439   | 0.0100439  | 0.0388115  | 0.0352365  | 0.0564037  | 0.0332447  |
| 0.0534683  | 0.27608    | 0.179535   | 0.0639244  | 0.0368056  | 0.0523607  | 0.0764675  | 0.141652   |
| 0.00984282 | 0.0977706  | 0.201033   | 0.00585526 | 0.0208061  | 0.0272052  | 0.0159411  | 0.0739681  |
| 0.156192   | 0.0329973  | 0.017108   | 0.0395333  | 0.0251382  | 0.0152384  | 0.0472955  | 0.0358338  |
| 0.0868517  | 0.0724301  | 0.0423258  | 0.0527821  | 0.0443006  | 0.0418971  | 0.150493   | 0.0560309  |
| 0.00192754 | 0.0267641  | 0.00390191 | 0.00123232 | 0.00543883 | 0.00356787 | 0.00297937 | 0.00349696 |
| 0.016235   | 0.0118596  | 0.0827048  | 0.0276943  | 0.00710732 | 0.00649531 | 0.21735    | 0.0100516  |
| 0.126103   | 0.080783   | 0.140969   | 0.0314825  | 0.140918   | 0.0962967  | 0.130339   | 0.126889   |
| 0.0258845  | 0.029322   | 0.053553   | 0.0148008  | 0.0320828  | 0.0280632  | 0.0311151  | 0.0326282  |
| 0.00559746 | 0.0456823  | 0.00610206 | 0.00779095 | 0.0834782  | 0.0141062  | 0.00986613 | 0.0112513  |
| 0.0907476  | 0.0622441  | 0.0624854  | 0.0319673  | 0.0545517  | 0.0322746  | 0.110393   | 0.0431591  |
| 0.129337   | 0.109735   | 0.0799693  | 0.0624436  | 0.062339   | 0.0551232  | 0.10159    | 0.0532593  |
| 0.0128375  | 0.0146067  | 0.00934349 | 0.00943822 | 0.00785646 | 0.00578414 | 0.0168792  | 0.00822179 |
| 0.20748    | 0.16916    | 0.150186   | 0.105402   | 0.126318   | 0.143559   | 0.0986715  | 0.158316   |
| 0.00848783 | 0.00772002 | 0.00541158 | 0.00193965 | 0.00644745 | 0.00477032 | 0.00785509 | 0.00454781 |
| 0.0101823  | 0.00526955 | 0.004273   | 0.00226616 | 0.00316323 | 0.00307881 | 0.0281879  | 0.00614934 |
| 0.0144934  | 0.028504   | 0.121529   | 0.0136537  | 0.017521   | 0.0245791  | 0.10748    | 0.0205768  |
| 0.0207913  | 0.0305564  | 0.00245007 | 0.0112451  | 0.0182489  | 0.0232447  | 0.0759226  | 0.0258139  |
| 0.0740204  | 0.0215403  | 0.0224035  | 0.0159434  | 0.0251841  | 0.0112051  | 0.163736   | 0.0320145  |
| 0.0296024  | 0.0611702  | 0.0834911  | 0.126785   | 0.0459594  | 0.0901655  | 0.13318    | 0.102062   |
| 0.142994   | 0.0291417  | 0.0162436  | 0.0172761  | 0.0395943  | 0.0422917  | 0.153543   | 0.0608903  |
| 0.0404923  | 0.192795   | 0.232881   | 0.0466613  | 0.0418753  | 0.0510235  | 0.209117   | 0.025524   |
| 0.0155442  | 0.0198649  | 0.0115951  | 0.15002    | 0.0110421  | 0.0345259  | 0.127893   | 0.00654414 |
| 0.0736288  | 0.0256221  | 0.0747159  | 0.0128693  | 0.0298429  | 0.0298989  | 0.138549   | 0.0227615  |
| 0.0238464  | 0.175773   | 0.159612   | 0.0653973  | 0.126052   | 0.102126   | 0.0622873  | 0.152855   |
| 0.063518   | 0.159259   | 0.0321319  | 0.0163037  | 0.0310627  | 0.0357315  | 0.0659135  | 0.0295817  |
| 0.174997   | 0.0608871  | 0.0364877  | 0.15233    | 0.107341   | 0.165092   | 0.107502   | 0.106173   |
| 0.0783244  | 0.0496406  | 0.0403901  | 0.125599   | 0.0704257  | 0.0540305  | 0.0750201  | 0.0602003  |
| 0.0852334  | 0.128335   | 0.199261   | 0.12276    | 0.185953   | 0.0564526  | 0.134278   | 0.158017   |
| 0.0615236  | 0.169192   | 0.0637144  | 0.135835   | 0.148358   | 0.141565   | 0.130267   | 0.166094   |
| 0.0308394  | 0.045431   | 0.204782   | 0.0334488  | 0.0337864  | 0.0298252  | 0.0863302  | 0.0389421  |
| 0.0156393  | 0.01756    | 0.00846399 | 0.00572231 | 0.00883082 | 0.0117811  | 0.0368462  | 0.0102306  |

To computes times for each marker need mutation rates



MatrixForm[  $\mu 00$  ]

$$\begin{pmatrix} 0.000722271 & 0.137882 \\ 0.00252192 & 0.175606 \\ 0.00130357 & 0.516471 \\ 0.00497715 & 0.199051 \\ 0.00126812 & 0.12551 \\ 0.00312581 & 0.3394 \\ 0.0000647366 & 0.244154 \\ 0.00021529 & 0.215784 \\ 0.00376011 & 0.113175 \\ 0.00193695 & 0.102042 \\ 0.000362231 & 0.273074 \\ 0.00295976 & 0.110029 \\ 0.00799224 & 0.0848847 \\ 0.000398105 & 0.17669 \\ 0.00297971 & 0.468587 \\ 0.000163263 & 0.205268 \\ 0.000114375 & 0.21543 \\ 0.00380365 & 0.151532 \\ 0.000995294 & 0.179893 \\ 0.00116395 & 0.214196 \\ 0.0117063 & 0.139137 \\ 0.00263369 & 0.133619 \\ 0.00393157 & 0.0996985 \\ 0.00032059 & 0.233166 \\ 0.00140393 & 0.17576 \\ 0.00810337 & 0.228217 \\ 0.00214539 & 0.130452 \\ 0.0106568 & 0.11133 \\ 0.00460282 & 0.204858 \\ 0.01471 & 0.0948324 \\ 0.0134021 & 2.00472 \\ 0.0029028 & 0.112088 \\ 0.000433081 & 0.141076 \end{pmatrix}$$

Also need hyperbolic Bessel functions

$nn = 60; \tau = .01;$

$I0[t\_]:=N\left[1 + \sum_{k=1}^{nn} \left(\frac{(t/2)^{(2*k)}}{k!*(k!)}\right), nn\right]; I1[t\_]:=N\left[\frac{t}{2} + \sum_{k=1}^{nn} \left(\frac{(t/2)^{(2*k+1)}}{k!*(k+1)!}\right), nn\right];$

$I2[t\_]:=N\left[\frac{t^2}{8} + \sum_{k=1}^{nn} \left(\frac{(t/2)^{(2*k+2)}}{k!*(k+2)!}\right), nn\right]; EE[t\_]:=N\left[1 + \sum_{k=1}^{nn} \left(\frac{t^k}{k!}\right), nn\right];$

$SGN[x\_]:=UnitStep[x] + (-1)*(1 - UnitStep[x]); \mu 0 = Table[\mu 00[[j, 1]], {j, 1, 33}];$

$\alpha = Table[\alpha 0[[j, 1]], {j, 1, 33}];$

$\mu = Table[\{\mu 0[[j]]*\alpha[[j]], \mu 0[[j]]*(1 - \alpha[[j]])\}, {j, 1, 33}]; H[t_, j_] :=$

$$\begin{aligned} & EE[-t*\mu 0[[j]]] * \left( I0\left[2t*\sqrt{\mu[[j, 1]]*\mu[[j, 2]]}\right] + \left(\sqrt{\frac{\mu[[j, 1]]}{\mu[[j, 2]]}}\right) * I1\left[2*\tau*t*\sqrt{\mu[[j, 1]]*\mu[[j, 2]]}\right] * \right. \\ & \left. \left(\frac{\mu[[j, 2]]}{\mu[[j, 1]]}\right) * I2\left[2*(1 - \tau)*t*\sqrt{\mu[[j, 1]]*\mu[[j, 2]]}\right] \right. \\ & \left. + \left(\sqrt{\frac{\mu[[j, 2]]}{\mu[[j, 1]]}}\right) * I1\left[2*\tau*t*\sqrt{\mu[[j, 1]]*\mu[[j, 2]]}\right] * \left(\frac{\mu[[j, 1]]}{\mu[[j, 2]]}\right) * \right. \\ & \left. I2\left[2*(1 - \tau)*t*\sqrt{\mu[[j, 1]]*\mu[[j, 2]]}\right] \right); \end{aligned}$$

The times T for each marker are obtained by

```
TS[k_] := Normal[InverseSeries[Series[(1 - H[x, k]), {x, 0, 60}]]]; TSS[t_, k_] := TS[k] /. x -> t;
```

which is applied to give expansion times for each marker

```
ZZZ01 = Parallelize[Table[TSS[ZZZ[[q1, k, 3]], k], {q1, 1, 8}, {k, 1, 33}]];
```

```
MatrixForm[Transpose[ZZZ01]]
```

```
(
407.203 745.888 65.9476 138.51 107.078 91.1482 148.092 137.529
54.2553 156.492 93.4188 206.936 88.553 253.043 193.422 135.232
108.765 228.193 1295.65 172.306 87.2671 71.1848 459.416 144.761
21.6883 108.901 167.1 20.1721 121.055 97.1282 52.7115 109.674
413.047 140.358 113.532 367.827 103.345 84.4952 619.416 139.631
131.05 170.949 80.0411 113.094 133.147 75.1141 1023.86 105.184
85.0834 2927.15 256.695 62.0648 299.495 214.98 147.468 129.58
2337.26 199.593 353.44 369.393 74.2456 89.3013 2940.57 100.859
134.181 133.109 104.465 69.65 170.101 148.332 245.394 154.463
42.5993 103.153 104.595 42.3597 91.5971 78.4726 290.096 145.157
92.4878 654.785 72.6387 89.0081 259.634 157.138 125.293 136.585
158.752 155.705 179.89 62.3289 103.904 91.9382 201.529 77.9842
104.23 138.46 66.0026 49.7747 91.1088 106.861 289.141 97.4104
163.463 150.689 113.503 157.665 86.0952 55.3393 1719.21 120.53
49.3623 152.367 137.763 22.3517 95.3347 101.584 49.385 160.425
164.596 138.614 132.058 59.6696 166.783 127.539 277.648 105.875
490.118 113.285 163.21 106.199 86.8137 112.156 968.708 211.067
80.4307 96.0044 222.838 107.391 91.9683 191.456 1102.76 105.832
105.572 149.514 7.58545 59.1864 111.687 143.177 651.989 339.302
342.875 113.841 122.743 94.2453 125.291 55.619 1452.75 323.54
183.088 144.329 107.693 82.7402 126.769 81.3532 294.972 63.5303
334.13 130.825 114.751 124.835 89.8265 110.214 456.773 128.035
130.467 183.747 281.819 40.1682 83.9784 123.225 207.79 113.447
805.373 200.201 71.387 204.634 70.4513 111.467 248.366 94.7549
103.01 76.9857 146.754 28.4232 137.827 105.308 226.595 84.2999
47.4786 129.094 154.545 44.0827 139.443 162.204 111.949 121.505
168.361 551.528 248.401 85.7678 105.897 97.5775 248.491 92.7994
304.143 137.153 122.494 80.592 90.7147 113.876 230.738 118.672
167.831 109.133 280.642 575.497 100.333 125.428 343.952 128.937
132.225 192.023 129.565 81.4689 158.809 109.295 352.956 147.646
1301.11 198.221 1298.72 281.979 329.967 261.634 311.339 196.013
61.1945 89.0373 690.95 86.3282 89.5821 150.128 256.813 90.4892
132.219 194.63 139.957 68.3293 90.571 158.222 147.813 105.072
)
```

The SD for T are

```
ZZZ001 = Parallelize[Table[TSS[(ZZZ[[q1, k, 3]] + ZZZ[[q1, k]]), k], {q1, 1, 8}, {k, 1, 33}]]];
ZZZ002 = Parallelize[Table[TSS[(ZZZ[[q1, k, 3]] - ZZZ[[q1, k]]), k], {q1, 1, 8}, {k, 1, 33}]]];
ZZZ02 = 0.5*(ZZZ001 - ZZZ002)
```

MatrixForm[ Transpose[ZZZ02]]

```
(
35.3745 76.0796 22.3553 45.8682 15.2219 24.5178 15.5416 34.7482
14.9582 36.9794 24.9631 8.39574 21.4063 34.5354 45.3361 21.6812
47.6569 304.723 1227.52 62.177 31.8336 44.3298 109.938 133.837
2.21588 34.9097 103.677 1.30772 7.82788 9.05847 4.21865 26.3997
263.798 33.4154 16.5164 59.0017 23.8446 13.9762 105.69 36.2485
46.8203 45.2437 18.6277 26.4156 23.9038 18.0879 2560.86 27.214
30.0166 543.801 61.7586 19.1484 86.4349 56.2488 46.6714 54.6867
133.15 57.9098 421.035 141.114 33.6333 30.853 2212.34 47.885
67.509 42.2603 65.4358 11.9637 90.9453 54.5133 119.857 75.1234
14.9263 19.7269 36.2246 8.52698 20.9671 17.7369 32.9826 24.3854
16.0256 163.068 17.3345 22.2754 256.008 41.4276 28.614 32.7767
58.926 39.6193 43.6599 13.9852 28.2798 15.9117 85.4523 20.136
55.8616 66.9808 21.6297 14.0044 21.9645 22.7935 243.517 19.9594
34.9462 39.5156 24.8191 25.6189 20.5899 14.9312 94.774 21.9146
82.3561 91.8126 77.4888 37.9868 56.9458 66.1593 38.5657 87.8415
53.9809 48.8078 34.1615 12.0437 41.0241 30.0823 51.257 28.5378
94.535 46.7174 38.1147 20.0731 27.9527 27.2913 277.531 55.1744
5.55259 11.7277 89.7761 5.90899 7.07462 15.345 2301.62 8.84551
23.5948 36.4711 2.48338 12.098 20.8539 27.5382 158.992 38.1436
107.317 22.0632 23.2613 15.8465 26.2526 10.4944 1238.65 44.8597
31.7232 45.7595 40.2954 45.1135 26.9981 29.7441 618.985 25.7489
153.104 16.5379 8.7791 9.62489 19.8634 22.5746 240.952 34.3546
19.3797 127.581 278.668 14.5173 16.1092 23.6461 159.39 11.2717
67.5829 67.4005 37.2723 517.156 35.4806 112.933 447.353 21.2421
63.4768 21.0046 69.6877 9.65704 27.288 25.7963 151.07 18.9054
5.03345 102.392 119.015 13.3773 73.854 71.6164 25.8455 77.6566
48.036 362.647 30.0507 9.73911 19.6574 22.0927 62.0412 18.0373
2617. 37.5859 18.5573 51.4442 39.3137 97.1415 200.008 56.7127
51.0714 22.2327 48.2617 800.298 29.996 26.8321 130.217 30.6184
64.4397 259.952 285.63 44.6256 463.411 28.7709 5540.92 219.195
7642.67 429.009 8521.82 864.266 3696.23 719.411 1181.31 381.004
13.7756 22.8054 1966.69 16.584 16.9775 19.1291 85.4561 19.651
39.1352 45.6275 21.2765 13.774 21.5456 29.9444 93.1496 25.1813
)
```

We are only using 29 markers

```
B = Table[j, {j, 1, 33}]; UU[x_] := 1 - UnitStep[-x];
B = UU[{1, 2, 0, 4, 5, 0, 7, 8, 9, 10, 11, 12, 13, 14, 0, 16, 17,
18, 19, 20, 21, 22, 23, 24, 25, 26, 27, 28, 29, 30, 0, 32, 33}]; BB[j_] := B[[j]];
```

We first sketch the spectrum of times

```
QQ[x_, q3_, q4_] := N[ $\frac{1}{q4 \sqrt{2 * \pi}} * \text{Exp}\left[-\frac{(x - q3)^2}{2 * (q4)^2}\right]$ ];
Q[x_, q1_, j_] := BB[j]*QQ[x, ZZZ01[[q1, j]] + .01, ZZZ02[[q1, j]] + .01]; Pic1[q_, a_, b_] :=
Plot[Evaluate[Table[Q[x, q, j], {j, 1, 33}]], {x, 0, a}, PlotRange -> {0, b}, PlotStyle -> Table[
RGBColor[UnitStep[22 - j] * (22 - j) / 22, Sin[j * \pi / 33], UnitStep[j - 11] * (j - 11) / 22], {j, 1, 33}],
PlotLabel ->
{q}]
```

This plots the time distributions for each marker

Pic1[1, 1000, 0.1]

{1}

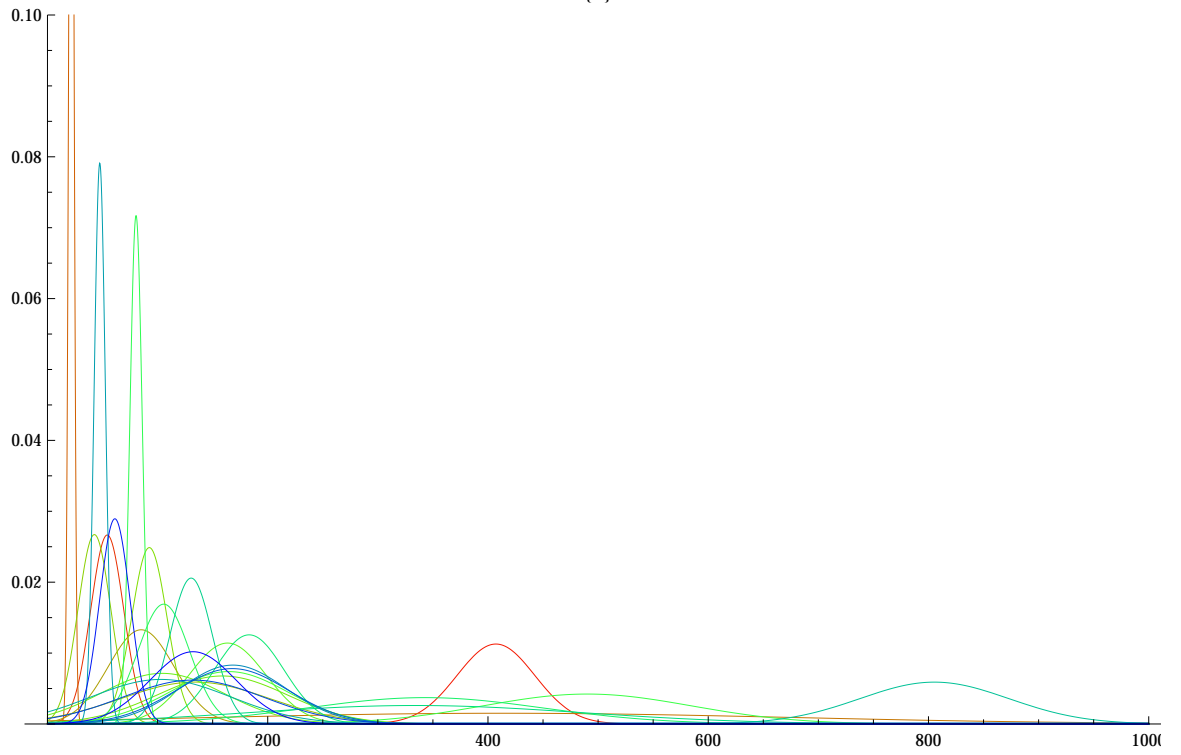

Pic1[2, 1000, 0.04]

{2}

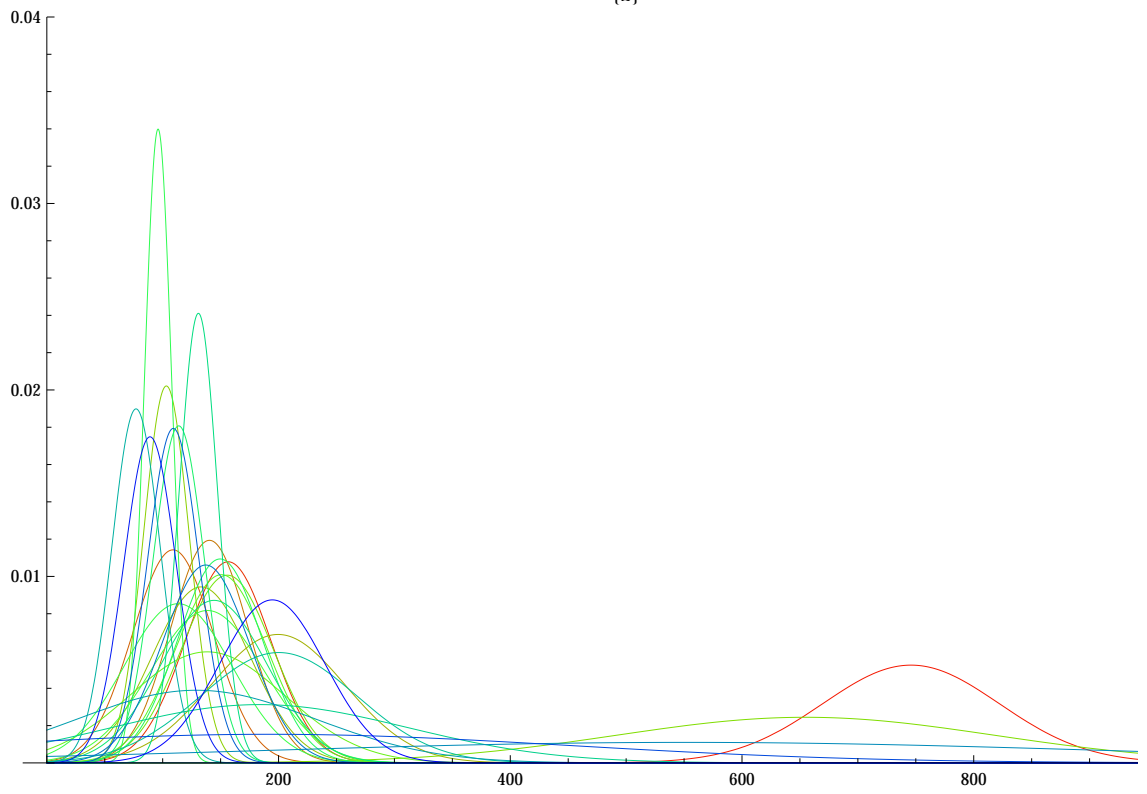

Pic1[3, 600, 0.06]

{3}

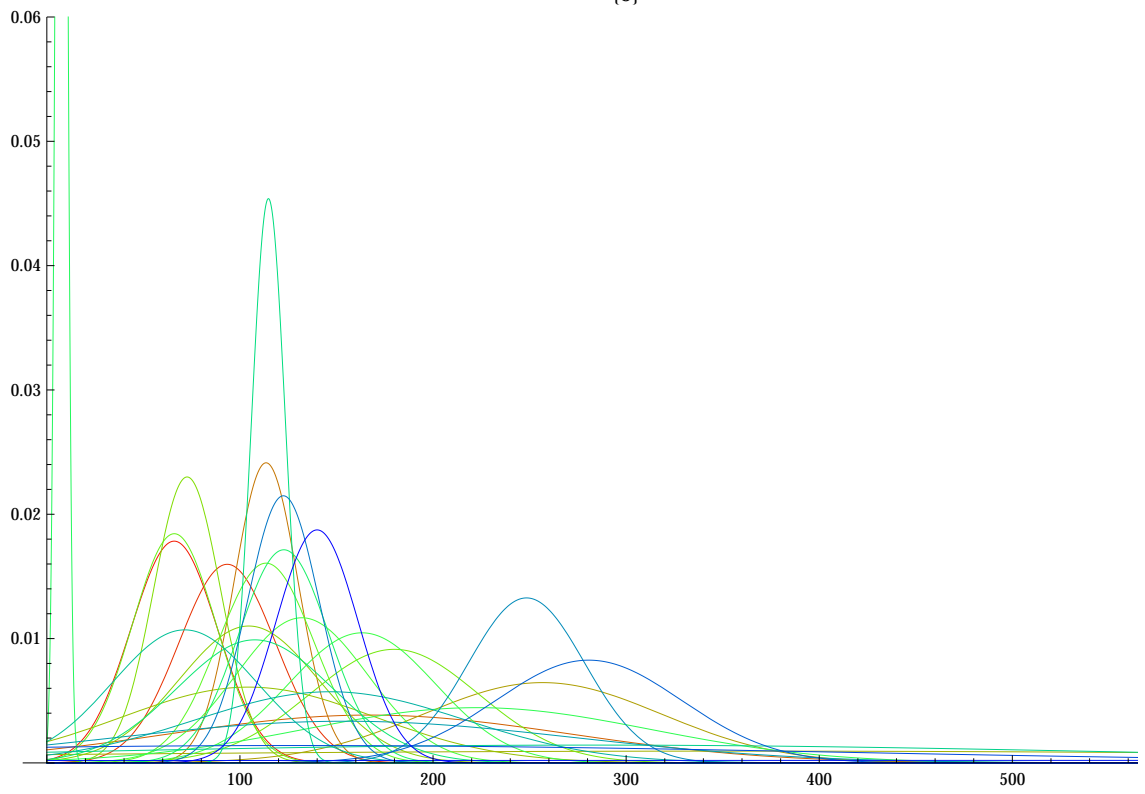

Pic1[4, 600, 0.1]

{4}

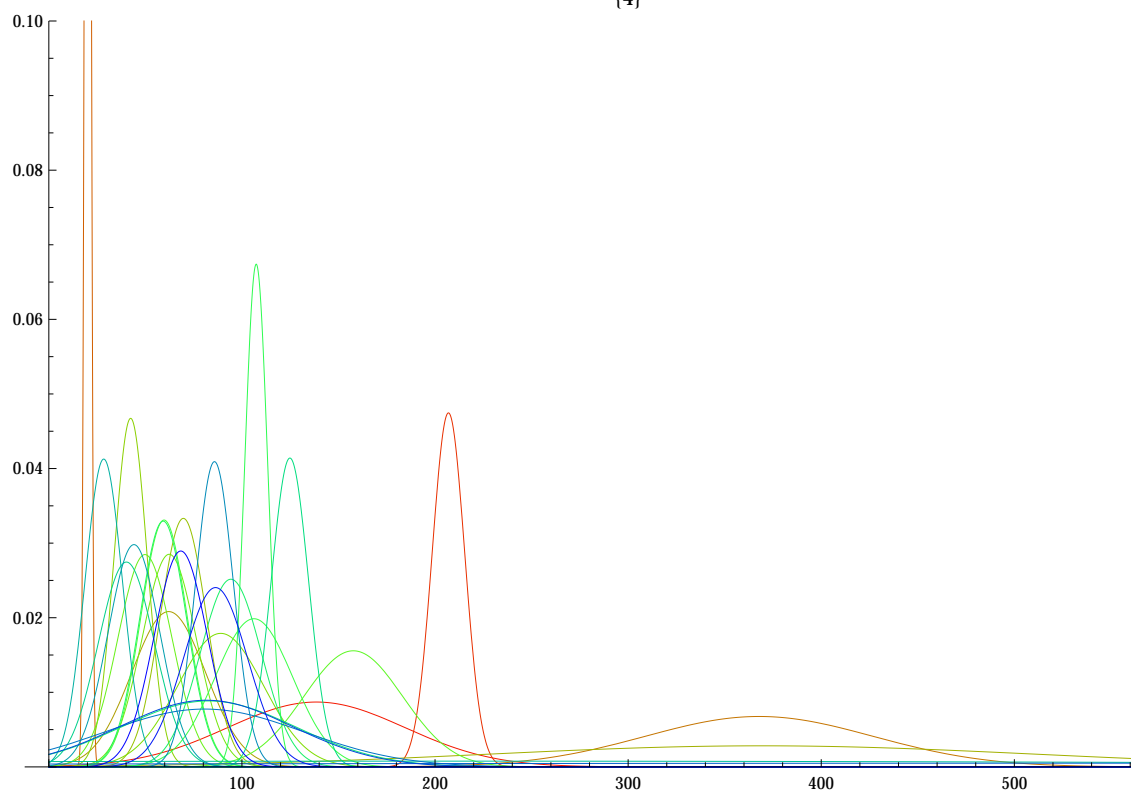

Pic1[5, 600, 0.06]

{5}

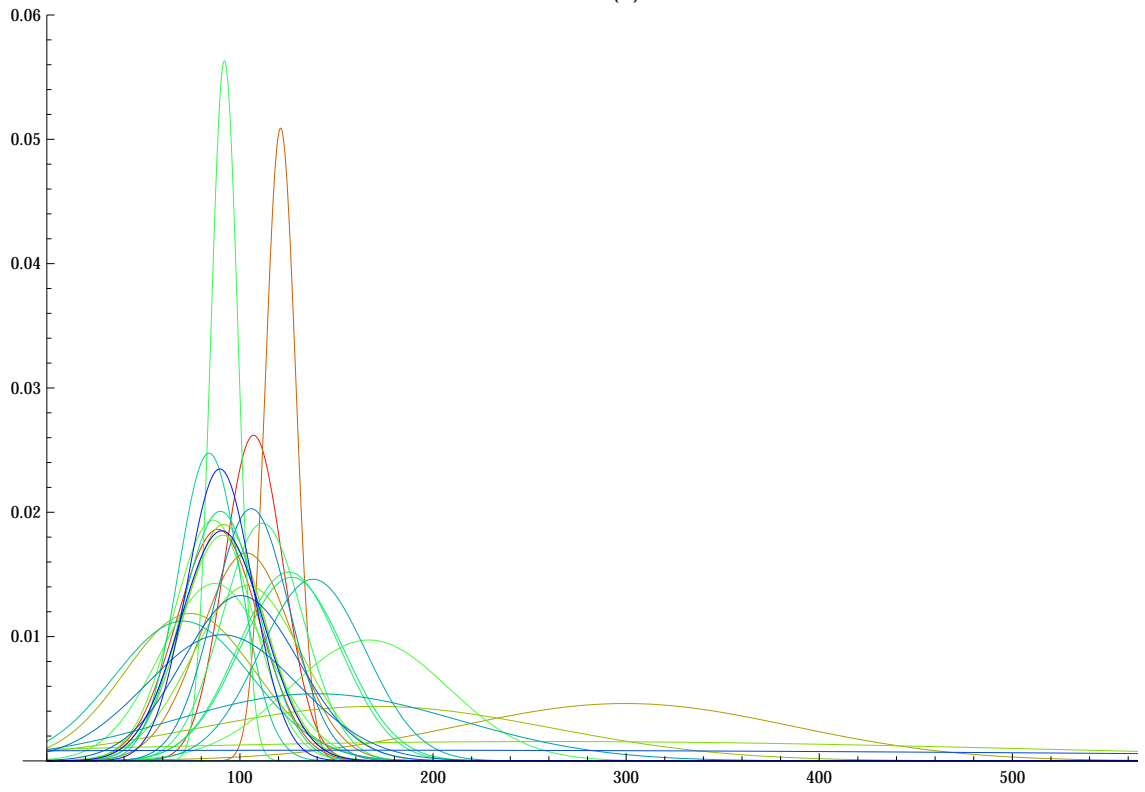



Pic1[6, 600, 0.06]

{6}

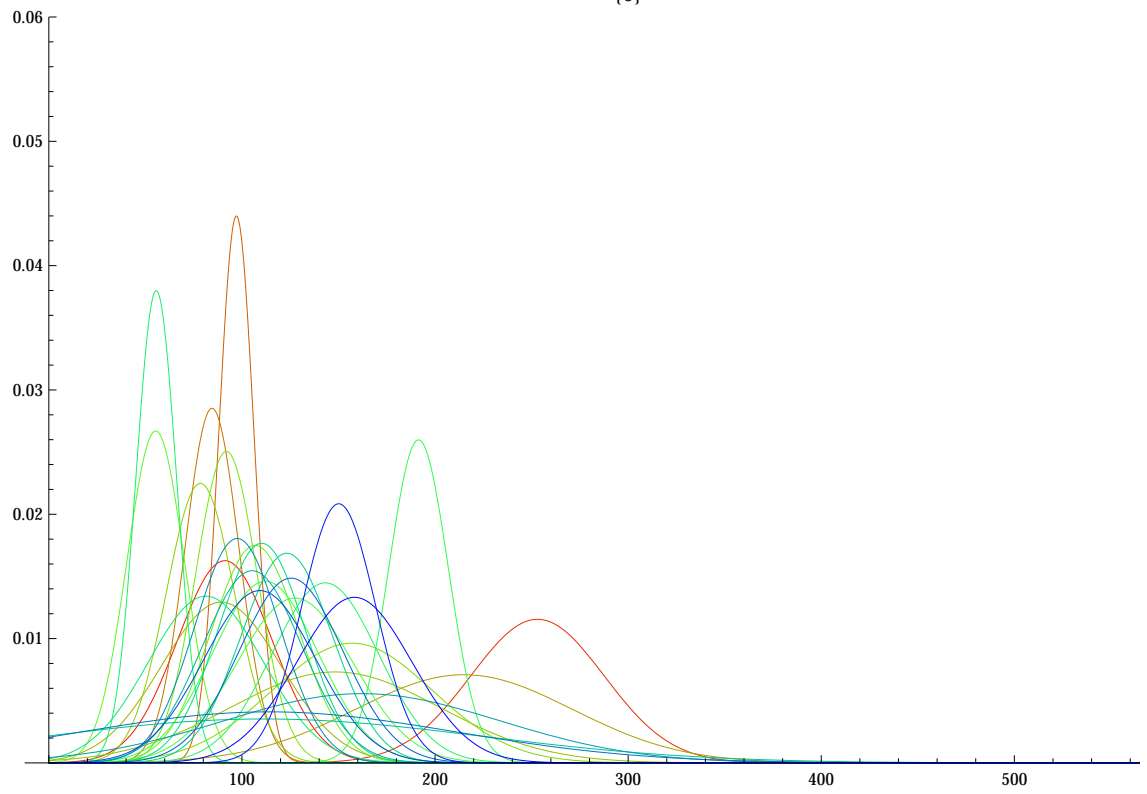

Pic1[7, 1600, 0.03]

{7}

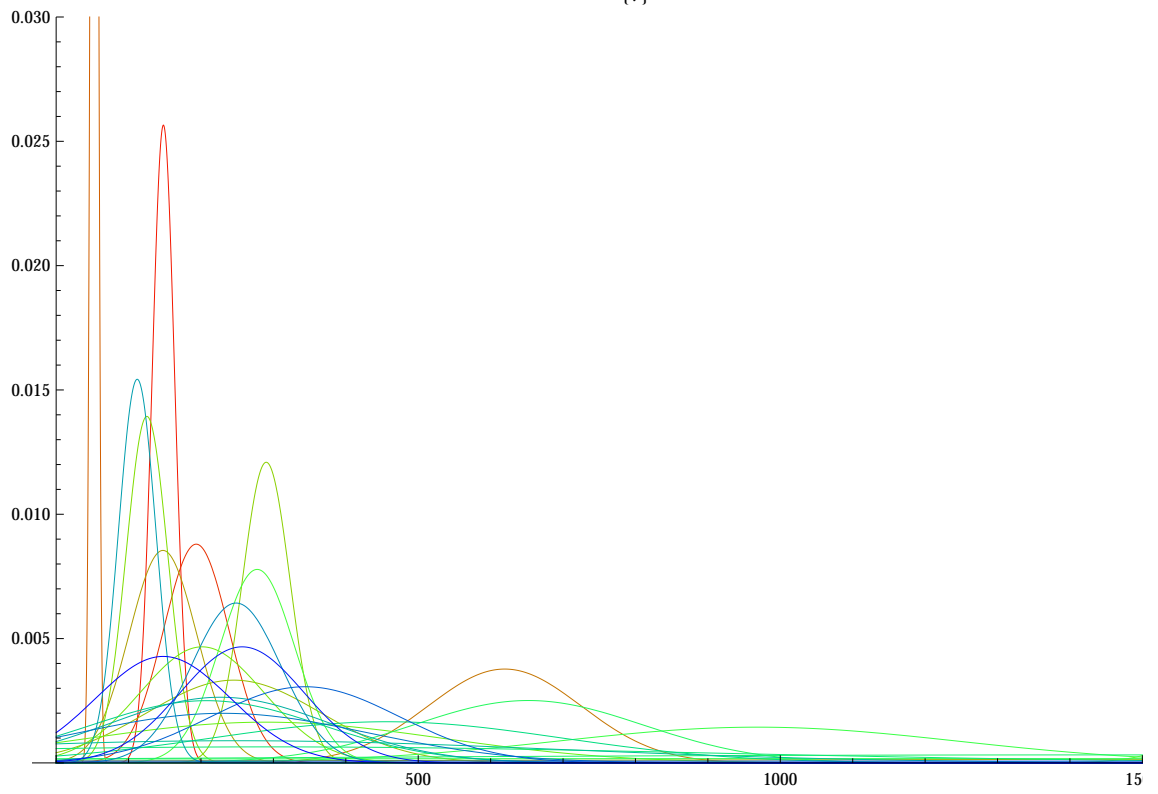

```
Pic1[8, 600, 0.06]
```

```
{8}
```

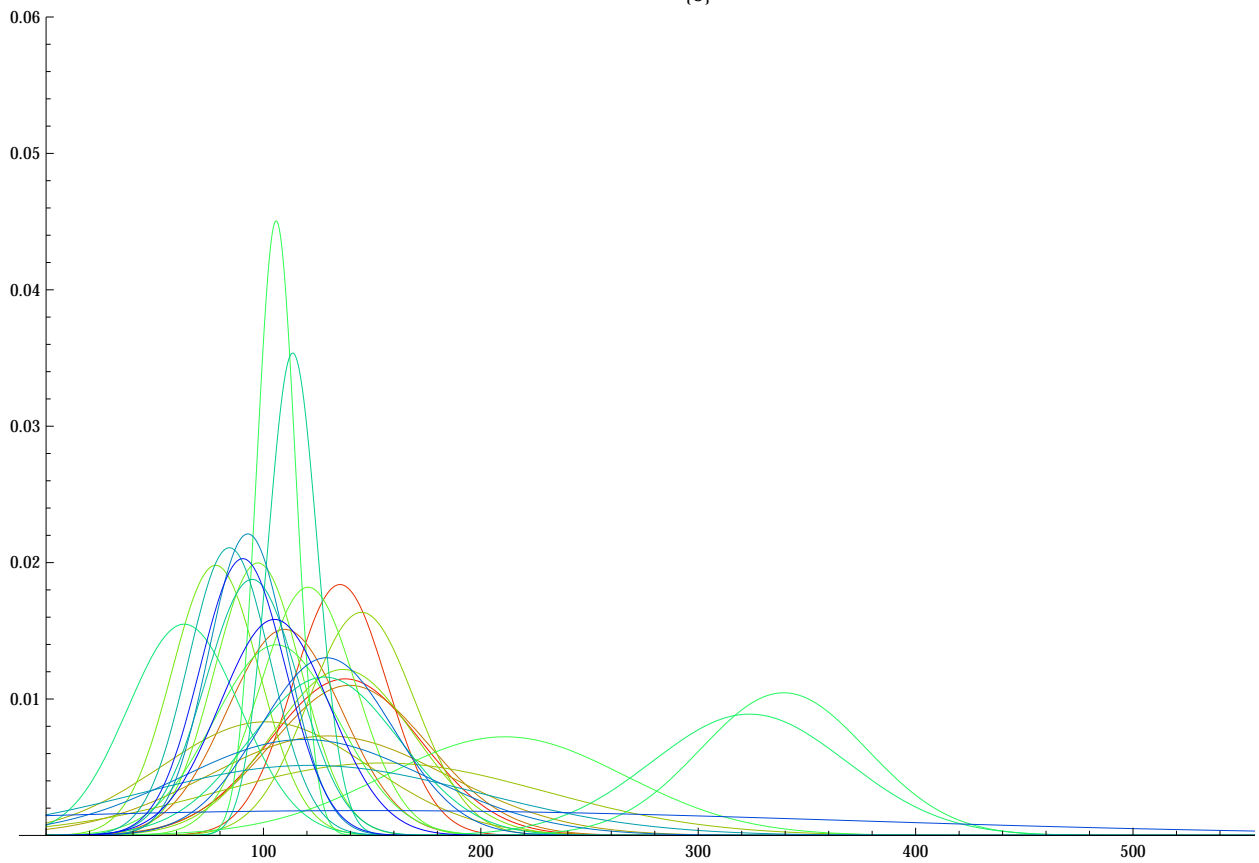

The individual branches may be combined to obtain average times

```
Q0[x_, q_] := Sum[Q[x, q, j] / 29, {j, 1, 33}];
Pic2[q_, a_, b_] := Plot[Q0[x, q], {x, 1, a}, PlotRange -> {0, b},
  PlotLabel -> {q}]
```

Pic2[1, 800, 0.01]

{1}

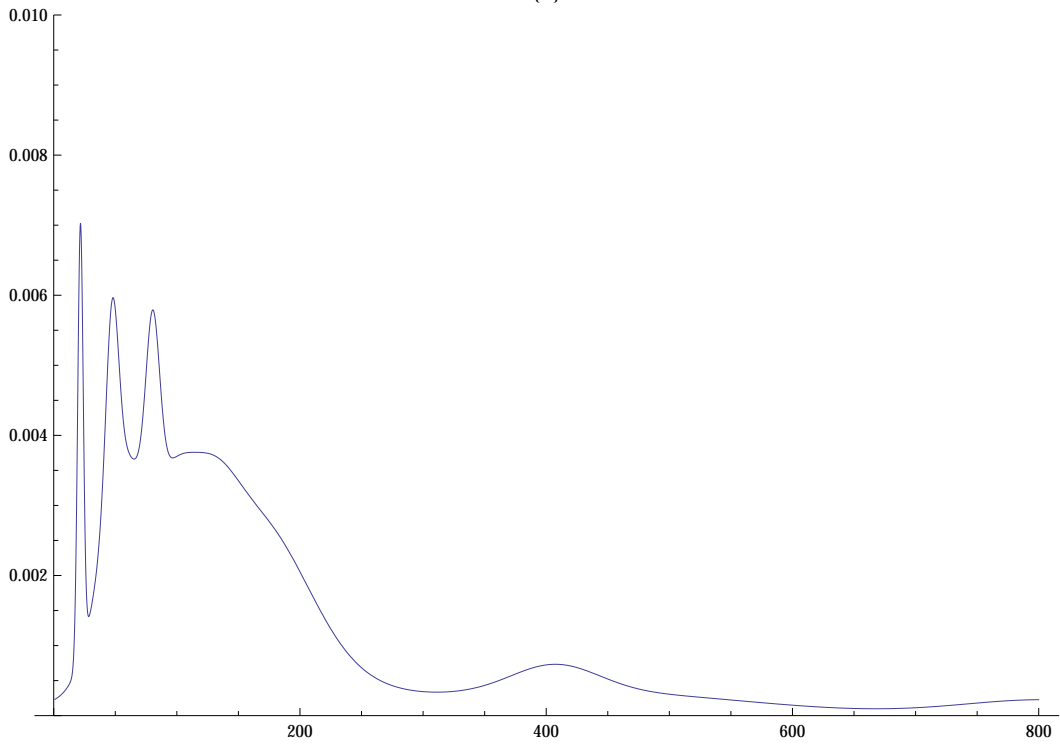

Pic2[2, 400, 0.01]

{2}

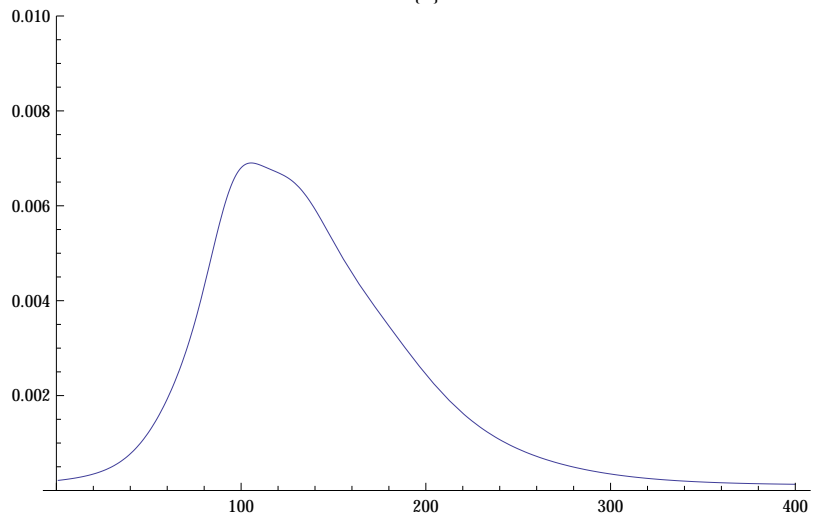

Pic2[3, 400, .01]

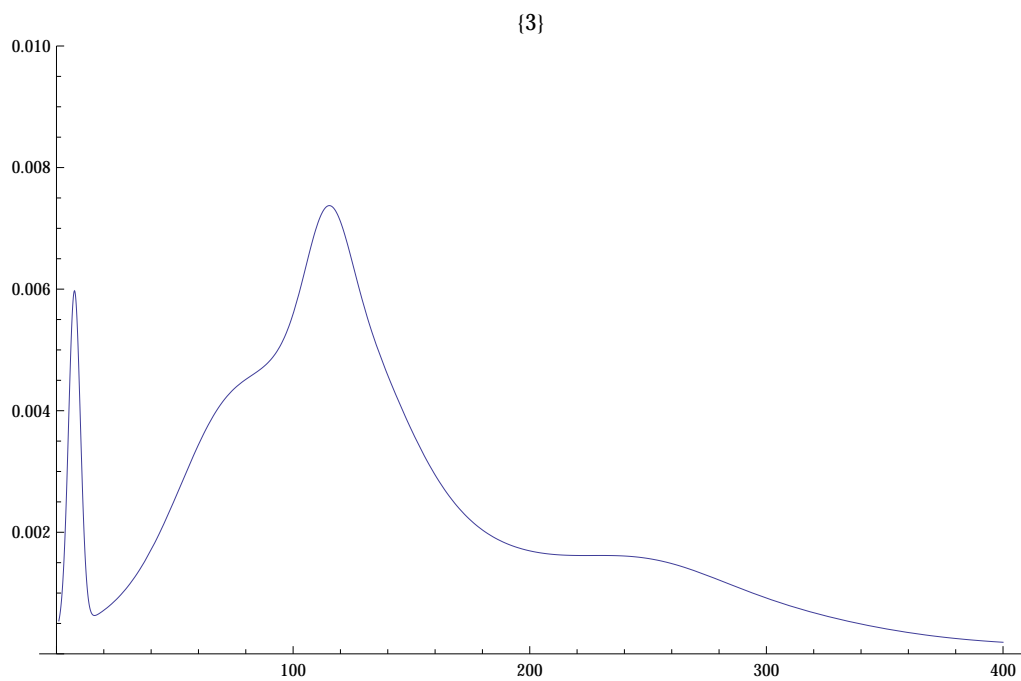

Pic2[4, 300, .01]

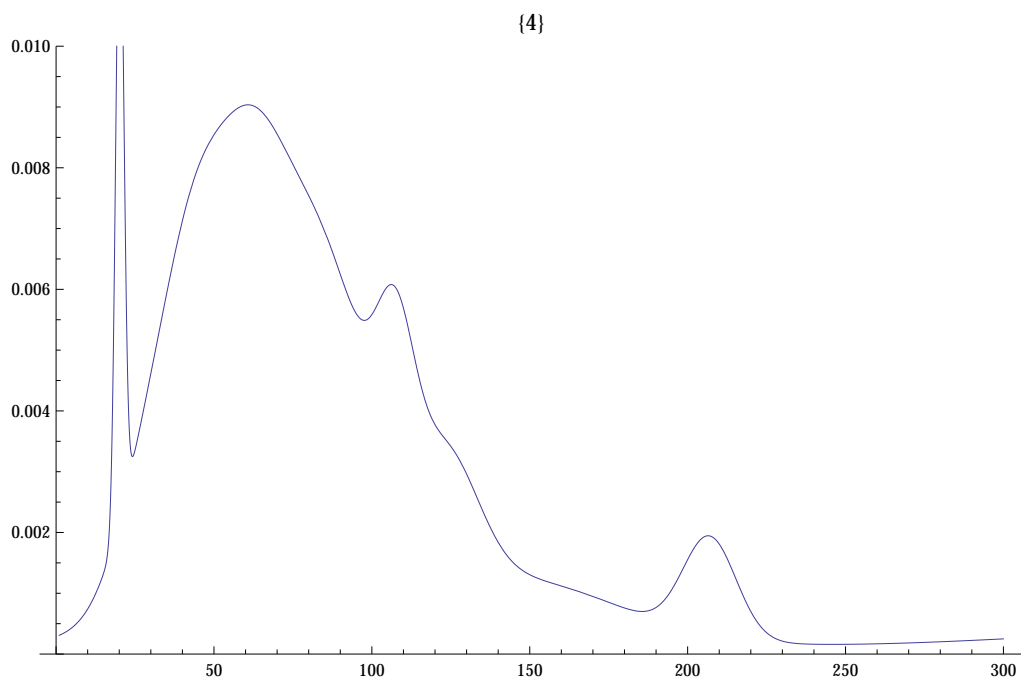

Pic2[5, 300, .015]

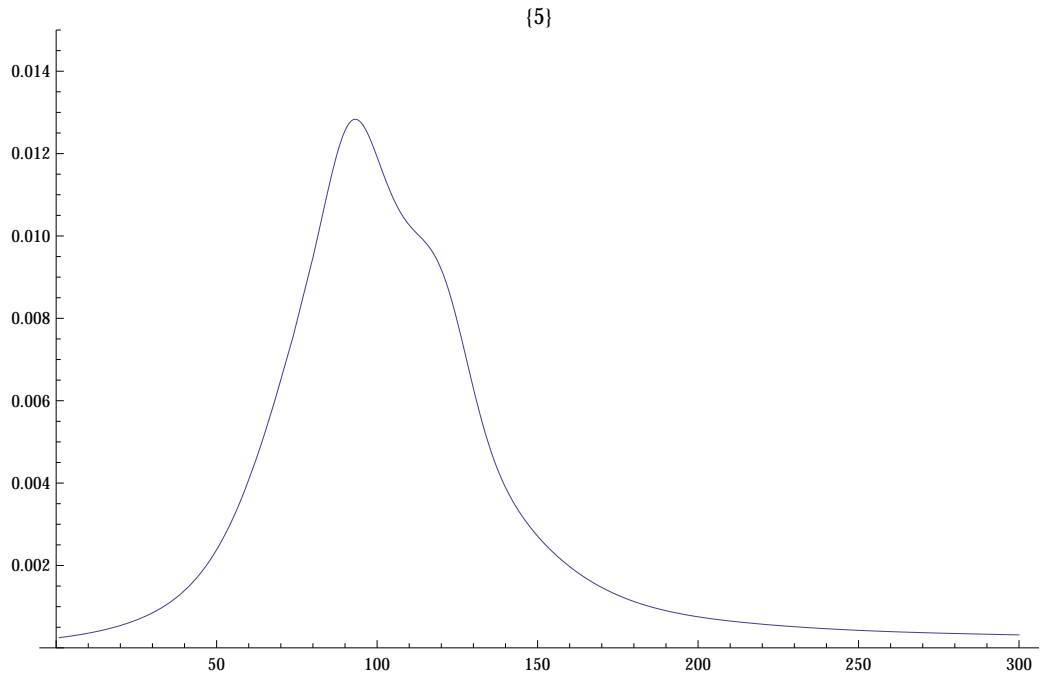

Pic2[6, 300, .01]

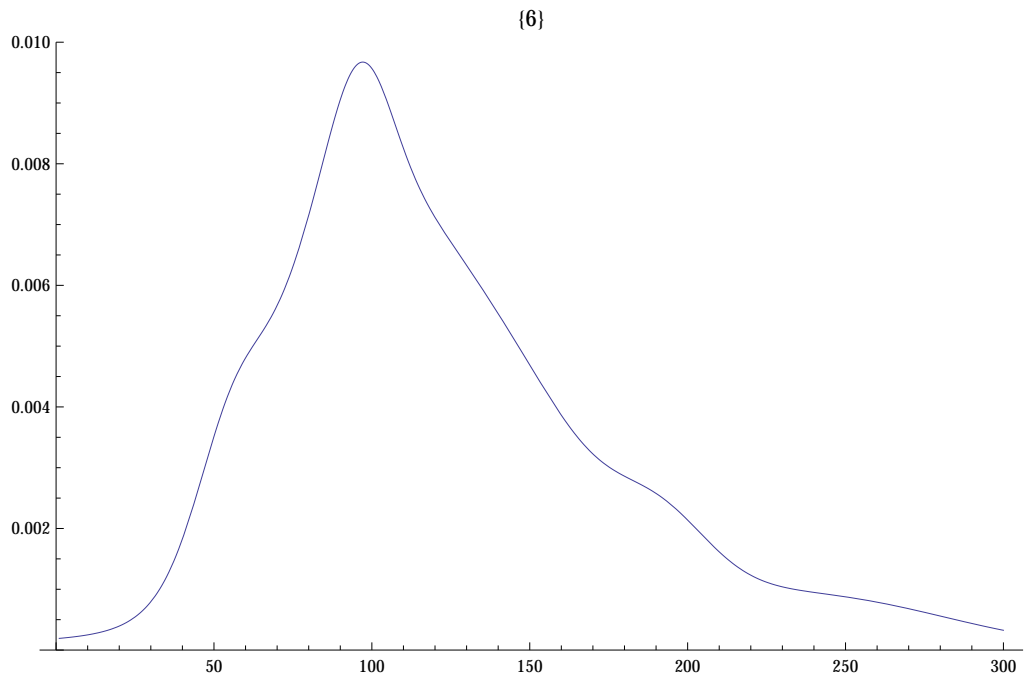

Pic2[7, 800, .005]

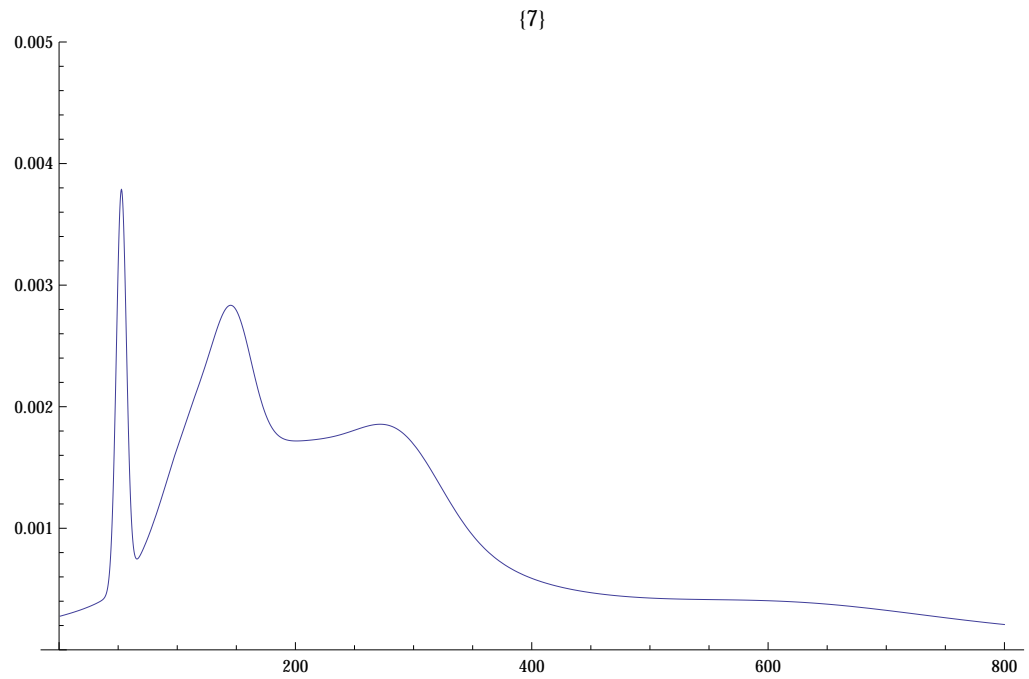

J2: Notice the spike at c50 generations ago, i.e. 650AD, the time of the Arab conquests.

Pic2[8, 400, .015]

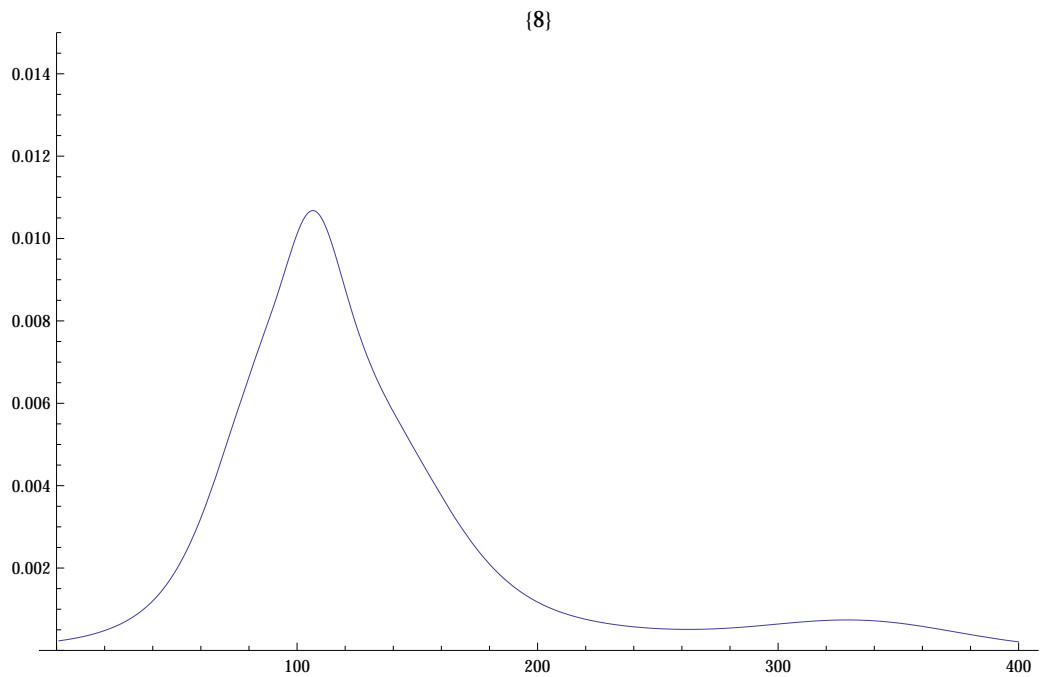

Some idea of the TMRCA is obtained by averaging, either the individual times or the overall, notice the discrepancy

```
m1 = Table[ Sum [BB[j] * ZZZ01[[q, j]], {j, 1, 33}] / 29.0, {q, 1, 8}]
```

```
{267.84, 288.422, 166.504, 122.94, 119.412, 122.29, 501.842, 133.084}
```

27 \*m1

```
{7231.69, 7787.39, 4495.61, 3319.37, 3224.13, 3301.84, 13549.7, 3593.27}
```

```
P0 = Table[ NIntegrate[ Q0[x, q], {x, 1, 800}], {q, 1, 8}]
```

```
{0.906858, 0.92433, 0.931425, 0.957112, 0.974528, 0.989365, 0.756562, 0.986581}
```

```
m2 = Table[ NIntegrate[ x*Q0[x, q]/P0[[q]], {x, 1, 800}], {q, 1, 8}]
```

```
{177.328, 181.523, 153.992, 112.943, 123.952, 124.166, 273.327, 136.124}
```

27 \*m2

```
{4787.86, 4901.12, 4157.79, 3049.47, 3346.71, 3352.48, 7379.82, 3675.35}
```

As the averages are not stable we use robust statistics, and stochastic simulations to get the MLE for the TMRCA

For later use we generate random quintiles at roughly 30,40,50,60,70%

```
n01 = 10000000; W0 = Flatten[Parallelize[Table[{Clear[R, Z]; R = RandomReal[ {.0005, .9995}, 29]; Z = Sort[R];
      {Z[[9]], Z[[12]], Z[[15]], Z[[18]], Z[[21]]}], {k, 1, n01}], 1]; {Mean[W0], Sqrt[Variance[W0]]}
{{0.300155, 0.40008, 0.499977, 0.599857, 0.699769}, {0.0822195, 0.0879131, 0.0897336, 0.0878987, 0.0822163}}
```

Using the distribution of times ZZZ01 we use bootstrap to generate the same quintiles for our data, inc SD

```
{n01, n00} = {100000, 33}; PPP[x_] := N[InverseCDF[NormalDistribution[0, 1.0], x]];
DD = Flatten[Table[{Clear[LM, WW0, Z]; LM = Table[
      Log[1 + (.001 + ZZZ02[[q1, j]]) / (.1 + ZZZ01[[q1, j]])], {j, 1, 33}; WW0 = Flatten[Parallelize[Table[
        {Clear[RR, R0, R1, RR, Z]; R0 = RandomReal[ {.01, .99}, n00]; R1 = Table[ PPP[R0[[j]]], {j, 1, n00}];
        RR = Table[ BB[j]*ZZZ01[[q1, j]]*Exp[ LM[[j]]*R1[[j]]], {j, 1, n00}; Z = Sort[RR];
        {Z[[13]], Z[[16]], Z[[19]], Z[[22]], Z[[25]]}], {k, 1, n01}], 1];
      {NN[[q1]], Mean[WW0], Sqrt[Variance[WW0]]}], {q1, 1, 8}], 1];
```

Thus for each file q our data used is the quintile and its SD

MatrixForm[DD]

```
( {1221 {90.8499, 115.439, 140.954, 170.332, 217.298} {10.1373, 12.621, 14.2566, 17.661, 28.7741}
  460 {114.848, 128.624, 143.707, 162.414, 189.27} {8.4479, 9.2868, 10.872, 13.6341, 18.6516}
  1270 {100.683, 114.985, 129.318, 150.008, 186.164} {9.06927, 8.13395, 10.0857, 14.84, 24.0563}
  2898 {59.2039, 69.987, 82.3342, 97.1986, 116.388} {5.27506, 5.92387, 6.67114, 7.98144, 9.91024}
  1029 {89.0055, 96.5624, 104.842, 114.359, 125.886} {5.31427, 5.52968, 6.16197, 6.63901, 8.09177}
  1533 {92.5846, 102.663, 114.04, 127.738, 144.532} {6.10225, 6.59259, 7.74065, 9.00197, 10.6095}
  1241 {176.613, 223.176, 272.816, 340.009, 500.669} {24.0803, 29.1931, 31.6585, 53.483, 99.4678}
  971 {98.4029, 107.6, 117.107, 128.584, 143.855} {6.21668, 6.16753, 7.00661, 8.59908, 11.1291} )
```

This is now applied to each case, beginning with

[We do G2a3 using 5 quintiles](#)

```
KK = 1; D0 = DD[[KK]]; {n0, m1, b1, b2, b3, b4, b5, L1, L2} = {D0[[1]], 1.0/D0[[1]],
  D0[[2, 1]], D0[[2, 2]], D0[[2, 3]], D0[[2, 4]], D0[[2, 5]], D0[[2, 2]], 1.5*D0[[2, 5]] }
{1221, 0.000819001, 90.8499, 115.439, 140.954, 170.332, 217.298, 115.439, 325.946}
```

The stochastic simulation uses the branching distribution  $\tau_0$  to generate random quintiles. These are filtered by requiring they are within two SD of the data. To speed the process we compiled the branching distribution in files 29ComFun together with interpolation file W29ComFun which must be loaded. This information is contained in the function F4 used. This are the slowest part of the routine, taking about an hour.



```

n01 = 5 000 000; Clear[ W10]; r = 2;
W10 = Flatten[Parallelize[Table[{Clear[ Y, a, J, Z, Z0, Z1]; Y = RandomReal[{L1, L2}];
a = RandomReal[{.05, 1.3}]; J = RandomInteger[{1, 10 000 000}]; Z0 = W0[[J]];
Z1 = {Y*F4[Z0[[1]], Y, a, m1], Z0[[2]], Z0[[3]], Z0[[4]], Z0[[5]]}; Z = Join[Z1, {Y, a}];
{Z}}, {k, 1, n01}]], 2]; W11 = Select[W10, #[[1]] < D0[[2, 1]] + r*D0[[3, 1]] &&
#[[1]] > D0[[2, 1]] - r*D0[[3, 1]] &]; n02 = Length[W11];
W12 = Flatten[Parallelize[Table[{Clear[ Y, a, Z, Z0]; Z0 = W11[[k]]; Y = Z0[[6]]; a = Z0[[7]];
Z = {Z0[[1]], Y*F4[Z0[[2]], Y, a, m1], Z0[[3]], Z0[[4]], Z0[[5]], Z0[[6]], Z0[[7]]};
{Z}}, {k, 1, n02}]], 2]; W13 = Select[W12, #[[2]] < D0[[2, 2]] + r*D0[[3, 2]] &&
#[[2]] > D0[[2, 2]] - r*D0[[3, 2]] &]; n03 = Length[W13];
W14 = Flatten[Parallelize[Table[{Clear[ Y, a, Z, Z0]; Z0 = W13[[k]]; Y = Z0[[6]]; a = Z0[[7]];
Z = {Z0[[1]], Z0[[2]], Y*F4[Z0[[3]], Y, a, m1], Z0[[4]], Z0[[5]], Z0[[6]], Z0[[7]]};
{Z}}, {k, 1, n03}]], 2]; W15 = Select[W14, #[[3]] < D0[[2, 3]] + r*D0[[3, 3]] &&
#[[3]] > D0[[2, 3]] - r*D0[[3, 3]] &]; n04 = Length[W15];
W16 = Flatten[Parallelize[Table[{Clear[ Y, a, Z, Z0]; Z0 = W15[[k]]; Y = Z0[[6]]; a = Z0[[7]];
Z = {Z0[[1]], Z0[[2]], Z0[[3]], Y*F4[Z0[[4]], Y, a, m1], Y*F4[Z0[[5]], Y, a, m1], Z0[[6]], Z0[[7]]};
{Z}}, {k, 1, n04}]], 2]; Clear[ W20]; W20 = Select[W16,
#[[4]] < D0[[2, 4]] + r*D0[[3, 4]] && #[[4]] > D0[[2, 4]] - r*D0[[3, 4]] &&
#[[5]] < D0[[2, 5]] + r*D0[[3, 5]] && #[[5]] > D0[[2, 5]] - r*D0[[3, 5]] &]; n05 = Length[W20]
253 250

```

Thus by filtering we now have 253,250 random quintiles within 2 SD of the experimental data. The mean for these is

$$\left\{ \text{Mean}[ \text{Table}[ \text{W20}[[j, 6]], \{j, 1, n05\}], \sqrt{\text{Variance}[ \text{Table}[ \text{W20}[[j, 6]], \{j, 1, n05\}]} \right\}$$

{235.85, 38.2347}

We now use least squares to find a quasilinear estimator which gives the best estimate of the TMRCA for all the random quintiles.

```

WW1 = Table[ { W20[[j, 1]], W20[[j, 2]], W20[[j, 3]], W20[[j, 4]], W20[[j, 5]], 1} * (W20[[j, 6]] ^ (-1),
{j, 1, n05}]; WW2 = Table[1, {j, 1, n05}];
WW3 = LeastSquares[WW1, WW2]; BB[{B1_, B2_, B3_, B4_, B5_}] :=
WW3[[1]]*B1 + WW3[[2]]*B2 + WW3[[3]]*B3 + WW3[[4]]*B4 + WW3[[5]]*B5
+ WW3[[6]]; BBW = Table[
BB[{W20[[j, 1]], W20[[j, 2]], W20[[j, 3]], W20[[j, 4]], W20[[j, 5]]}]/W20[[j, 6]] - 1, {j, 1, n05}];
D1 = {n01, n05, Mean[BBW], \sqrt{Variance[BBW]}}; D2 = {1 + D1[[3]], 1/(1 + D1[[3]])};
BB1[{B1_, B2_, B3_, B4_, B5_}] = D2[[2]]*BB[{B1, B2, B3, B4, B5}];
BBW = Table[BB1[{W20[[j, 1]], W20[[j, 2]], W20[[j, 3]], W20[[j, 4]], W20[[j, 5]]}]/W20[[j, 6]] - 1,
{j, 1, n05}]; D3 = {n01, n05, Mean[BBW], \sqrt{Variance[BBW]}}
{5 000 000, 253 250, -4.46895 \times 10^{-16}, 0.102957}

```

We see the QL estimates the TMRCA with average accuracy  $-4.46895 \times 10^{-16}$  and overall SD 0.102957. Thus we estimate the TMRCA from our experimental data in generations

```
g1 = BB1[D0[[2]]]
```

272.582

Also we estimate the SD given the variance in the experimental data

```

ee = {{1, 0, 0, 0, 0}, {0, 1, 0, 0, 0}, {0, 0, 1, 0, 0}, {0, 0, 0, 1, 0}, {0, 0, 0, 0, 1}}; WS =
Flatten[Table[{Clear[b1, b2, b3, b4, b5]; {b1, b2, b3, b4, b5} = D0[[2]] + (-1)^j*(D0[[3]]).ee[[i]] ee[[i]];
{BB1[{b1, b2, b3, b4, b5}]}, {i, 1, 5}, {j, 0, 1}]]; D4 = {Mean[WS], \sqrt{Variance[WS]}}
{272.582, 18.3486}

```

```
t1 = D4[[1]]
```

272.582

Thus our estimate for the TMRCA in ybp is

```
27 * D4
{7359.7, 495.411}
D5 = D4[[2]] / D4[[1]]
0.067314
```

One should not forget that the overall variance is the sum of the variance from sample error and the intrinsic error of the stochastic simulation

```
r0 =  $\sqrt{D3[[4]]^2 + D5^2}$ 
0.12301
```

This % error gives SD in years:

```
.125 * 7300
912.5
```

ie for G2a3 we have 5359BC  $\pm$  912(1824 at 95% CI)

This is now repeated for each file, but this time without explanation

Next we do R1b1a2 using 5 quintiles

```
KK = 2; D0 = DD[[KK]]; {n0, m1, b1, b2, b3, b4, b5, L1, L2} = {D0[[1]], 1.0/D0[[1]],
  D0[[2, 1]], D0[[2, 2]], D0[[2, 3]], D0[[2, 4]], D0[[2, 5]], D0[[2, 2]], 1.5*D0[[2, 5]] }
{460, 0.00217391, 114.848, 128.624, 143.707, 162.414, 189.27, 128.624, 283.904}

n01 = 5000000; Clear[W10]; r = 2;
W10 = Flatten[Parallelize[Table[{Clear[Y, a, J, Z, Z0, Z1]; Y = RandomReal[{L1, L2}];
  a = RandomReal[{.05, 1.3}]; J = RandomInteger[{1, 10000000}]; Z0 = W0[[J]];
  Z1 = {Y * F4[Z0[[1]], Y, a, m1], Z0[[2]], Z0[[3]], Z0[[4]], Z0[[5]]}; Z = Join[Z1, {Y, a}];
  {Z}}, {k, 1, n01}], 2]; W11 = Select[W10, #[[1]] < D0[[2, 1]] + r * D0[[3, 1]] &&
  #[[1]] > D0[[2, 1]] - r * D0[[3, 1]] &]; n02 = Length[W11];
W12 = Flatten[Parallelize[Table[{Clear[Y, a, Z, Z0]; Z0 = W11[[k]]; Y = Z0[[6]]; a = Z0[[7]];
  Z = {Z0[[1]], Y * F4[Z0[[2]], Y, a, m1], Z0[[3]], Z0[[4]], Z0[[5]], Z0[[6]], Z0[[7]]};
  {Z}}, {k, 1, n02}], 2]; W13 = Select[W12, #[[2]] < D0[[2, 2]] + r * D0[[3, 2]] &&
  #[[2]] > D0[[2, 2]] - r * D0[[3, 2]] &]; n03 = Length[W13];
W14 = Flatten[Parallelize[Table[{Clear[Y, a, Z, Z0]; Z0 = W13[[k]]; Y = Z0[[6]]; a = Z0[[7]];
  Z = {Z0[[1]], Z0[[2]], Y * F4[Z0[[3]], Y, a, m1], Z0[[4]], Z0[[5]], Z0[[6]], Z0[[7]]};
  {Z}}, {k, 1, n03}], 2]; W15 = Select[W14, #[[3]] < D0[[2, 3]] + r * D0[[3, 3]] &&
  #[[3]] > D0[[2, 3]] - r * D0[[3, 3]] &]; n04 = Length[W15];
W16 = Flatten[Parallelize[Table[{Clear[Y, a, Z, Z0]; Z0 = W15[[k]]; Y = Z0[[6]]; a = Z0[[7]];
  Z = {Z0[[1]], Z0[[2]], Z0[[3]], Y * F4[Z0[[4]], Y, a, m1], Y * F4[Z0[[5]], Y, a, m1], Z0[[6]], Z0[[7]]};
  {Z}}, {k, 1, n04}], 2]; Clear[W20]; W20 = Select[W16,
  #[[4]] < D0[[2, 4]] + r * D0[[3, 4]] && #[[4]] > D0[[2, 4]] - r * D0[[3, 4]] &&
  #[[5]] < D0[[2, 5]] + r * D0[[3, 5]] && #[[5]] > D0[[2, 5]] - r * D0[[3, 5]] &]; n05 = Length[W20]
320405

{Mean[Table[W20[[j, 6]], {j, 1, n05}],  $\sqrt{\text{Variance}[Table[W20[[j, 6]], {j, 1, n05}]}$ ]}
{198.638, 31.3521}
```

```

WW1 = Table[ { W20[[j, 1]], W20[[j, 2]], W20[[j, 3]], W20[[j, 4]], W20[[j, 5]], 1} * (W20[[j, 6]]) ^ (-1),
{j, 1, n05}]; WW2 = Table[1, {j, 1, n05}];
WW3 = LeastSquares[WW1, WW2]; BB[{B1_, B2_, B3_, B4_, B5_}] :=
WW3[[1]] * B1 + WW3[[2]] * B2 + WW3[[3]] * B3 + WW3[[4]] * B4 + WW3[[5]] * B5
+ WW3[[6]]; BBW = Table[
BB[ {W20[[j, 1]], W20[[j, 2]], W20[[j, 3]], W20[[j, 4]], W20[[j, 5]]} ] / W20[[j, 6]] - 1, {j, 1, n05}];
D1 = {n01, n05, Mean[BBW],  $\sqrt{\text{Variance}[BBW]}$  }; D2 = {1 + D1[[3]], 1 / (1 + D1[[3]))};
BB1[{B1_, B2_, B3_, B4_, B5_}] = D2[[2]] * BB[{B1, B2, B3, B4, B5}];
BBW = Table[ BB1[ {W20[[j, 1]], W20[[j, 2]], W20[[j, 3]], W20[[j, 4]], W20[[j, 5]]} ] / W20[[j, 6]] - 1,
{j, 1, n05}]; D3 = {n01, n05, Mean[BBW],  $\sqrt{\text{Variance}[BBW]}$  }
{5 000 000, 320 405, 1.64125  $\times 10^{-16}$ , 0.0987823}

g1 = BB1[D0[[2]] ]
210.822

ee = {{1, 0, 0, 0, 0}, {0, 1, 0, 0, 0}, {0, 0, 1, 0, 0}, {0, 0, 0, 1, 0}, {0, 0, 0, 0, 1}}; WS =
Flatten[Table[ {Clear[b1, b2, b3, b4, b5]; {b1, b2, b3, b4, b5} = D0[[2]] + (-1)^j * (D0[[3]] . ee[[i]]) ee[[i]];
{BB1[{b1, b2, b3, b4, b5}]}, {i, 1, 5}, {j, 0, 1}]; D4 = {Mean[WS],  $\sqrt{\text{Variance}[WS]}$  }
{210.822, 11.2174}

t1 = D4[[1]]
210.822

27 * D4
{5692.2, 302.869}

D5 = D4[[2]] / D4[[1]]
0.0532077

r0 =  $\sqrt{D3[[4]]^2 + D5^2}$ 
0.112201

ie for R1b1a2 we have 3700BC  $\pm$  625(1250 at 95% CI)

Next we do R1a1 using 5 quintiles

KK = 3; D0 = DD[KK]; {n0, m1, b1, b2, b3, b4, b5, L1, L2} = {D0[[1]], 1.0 / D0[[1]],
D0[[2, 1]], D0[[2, 2]], D0[[2, 3]], D0[[2, 4]], D0[[2, 5]], D0[[2, 2]], 1.5 * D0[[2, 5]] }
{1270, 0.000787402, 100.683, 114.985, 129.318, 150.008, 186.164, 114.985, 279.245}

```

```

n01 = 5 000 000; Clear[ W10]; r = 2;
W10 = Flatten[Parallelize[Table[{Clear[ Y, a, J, Z, Z0, Z1]; Y = RandomReal[{L1, L2}];
a = RandomReal[ {.05, 1.3}]; J = RandomInteger[{1, 10 000 000}]; Z0 = W0[[J]];
Z1 = {Y*F4[Z0[[1]], Y, a, m1], Z0[[2]], Z0[[3]], Z0[[4]], Z0[[5]]}; Z = Join[Z1, {Y, a}];
{Z}}, {k, 1, n01}]], 2]; W11 = Select[W10, #[[1]] < D0[[2, 1]] + r*D0[[3, 1]] &&
#[[1]] > D0[[2, 1]] - r*D0[[3, 1]] &]; n02 = Length[W11];
W12 = Flatten[Parallelize[Table[{Clear[ Y, a, Z, Z0]; Z0 = W11[[k]]; Y = Z0[[6]]; a = Z0[[7]];
Z = {Z0[[1]], Y*F4[Z0[[2]], Y, a, m1], Z0[[3]], Z0[[4]], Z0[[5]], Z0[[6]], Z0[[7]]};
{Z}}, {k, 1, n02}]], 2]; W13 = Select[W12, #[[2]] < D0[[2, 2]] + r*D0[[3, 2]] &&
#[[2]] > D0[[2, 2]] - r*D0[[3, 2]] &]; n03 = Length[W13];
W14 = Flatten[Parallelize[Table[{Clear[ Y, a, Z, Z0]; Z0 = W13[[k]]; Y = Z0[[6]]; a = Z0[[7]];
Z = {Z0[[1]], Z0[[2]], Y*F4[Z0[[3]], Y, a, m1], Z0[[4]], Z0[[5]], Z0[[6]], Z0[[7]]};
{Z}}, {k, 1, n03}]], 2]; W15 = Select[W14, #[[3]] < D0[[2, 3]] + r*D0[[3, 3]] &&
#[[3]] > D0[[2, 3]] - r*D0[[3, 3]] &]; n04 = Length[W15];
W16 = Flatten[Parallelize[Table[{Clear[ Y, a, Z, Z0]; Z0 = W15[[k]]; Y = Z0[[6]]; a = Z0[[7]];
Z = {Z0[[1]], Z0[[2]], Z0[[3]], Y*F4[Z0[[4]], Y, a, m1], Y*F4[Z0[[5]], Y, a, m1], Z0[[6]], Z0[[7]]};
{Z}}, {k, 1, n04}]], 2]; Clear[ W20]; W20 = Select[W16,
#[[4]] < D0[[2, 4]] + r*D0[[3, 4]] && #[[4]] > D0[[2, 4]] - r*D0[[3, 4]] &&
#[[5]] < D0[[2, 5]] + r*D0[[3, 5]] && #[[5]] > D0[[2, 5]] - r*D0[[3, 5]] &]; n05 = Length[W20]
315 232

```

```

{Mean[ Table[ W20[[j, 6]], {j, 1, n05}]],  $\sqrt{\text{Variance}[ \text{Table}[ W20[[j, 6]], {j, 1, n05} ]]}$ 
(187.278, 32.116)

```

```

WW1 = Table[ { W20[[j, 1]], W20[[j, 2]], W20[[j, 3]], W20[[j, 4]], W20[[j, 5]], 1} * (W20[[j, 6]] ^ (-1),
{j, 1, n05}]; WW2 = Table[ 1, {j, 1, n05}];
WW3 = LeastSquares[WW1, WW2]; BB[{B1_, B2_, B3_, B4_, B5_}] :=
WW3[[1]]*B1 + WW3[[2]]*B2 + WW3[[3]]*B3 + WW3[[4]]*B4 + WW3[[5]]*B5
+ WW3[[6]]; BBW = Table[
BB[ {W20[[j, 1]], W20[[j, 2]], W20[[j, 3]], W20[[j, 4]], W20[[j, 5]]} ] / W20[[j, 6]] - 1, {j, 1, n05}];
D1 = {n01, n05, Mean[BBW],  $\sqrt{\text{Variance}[BBW]}$  }; D2 = {1 + D1[[3]], 1 / (1 + D1[[3]])};
BB1[{B1_, B2_, B3_, B4_, B5_}] = D2[[2]]*BB[{B1, B2, B3, B4, B5}];
BBW = Table[ BB1[ {W20[[j, 1]], W20[[j, 2]], W20[[j, 3]], W20[[j, 4]], W20[[j, 5]]} ] / W20[[j, 6]] - 1,
{j, 1, n05}]; D3 = {n01, n05, Mean[BBW],  $\sqrt{\text{Variance}[BBW]}$  }
{5 000 000, 315 232, -7.57454  $\times 10^{-16}$ , 0.0944614}

```

```
g1 = BB1[D0[[2]]]
```

```
218.451
```

```

ee = {{1, 0, 0, 0, 0}, {0, 1, 0, 0, 0}, {0, 0, 1, 0, 0}, {0, 0, 0, 1, 0}, {0, 0, 0, 0, 1}}; WS =
Flatten[Table[ {Clear[b1, b2, b3, b4, b5]; {b1, b2, b3, b4, b5} = D0[[2]] + (-1)^j * (D0[[3]].ee[[i]]) ee[[i]];
{BB1[{b1, b2, b3, b4, b5}]}], {i, 1, 5}, {j, 0, 1}]; D4 = {Mean[WS],  $\sqrt{\text{Variance}[WS]}$  }
(218.451, 15.2288)

```

```
t1 = D4[[1]]
```

```
218.451
```

```
27 * D4
```

```
{5898.17, 411.177}
```

```
D5 = D4[[2]] / D4[[1]]
```

```
0.0697126
```

```
r0 =  $\sqrt{D3[[4]]^2 + D5^2}$ 
0.1174
```

```
.12*5900
```

```
708.
```

ie for R1a1 we have 4000BC  $\pm$  700(1400 at 95% CI)

Next we do I1 using 5 quintiles

```
KK = 4; D0 = DD[[KK]]; {n0, m1, b1, b2, b3, b4, b5, L1, L2} = {D0[[1]], 1.0/D0[[1]],
  D0[[2, 1]], D0[[2, 2]], D0[[2, 3]], D0[[2, 4]], D0[[2, 5]], D0[[2, 2]], 1.5*D0[[2, 5]] }
{2898, 0.000345066, 59.2039, 69.987, 82.3342, 97.1986, 116.388, 69.987, 174.581}

n01 = 5 000 000; Clear[W10]; r = 2;
W10 = Flatten[Parallelize[Table[{Clear[Y, a, J, Z, Z0, Z1]; Y = RandomReal[{L1, L2}];
  a = RandomReal[{.05, 1.3}]; J = RandomInteger[{1, 10 000 000}]; Z0 = W0[[J]];
  Z1 = {Y*F4[Z0[[1]], Y, a, m1], Z0[[2]], Z0[[3]], Z0[[4]], Z0[[5]]}; Z = Join[Z1, {Y, a}];
  {Z}}, {k, 1, n01}]], 2]; W11 = Select[W10, #[[1]] < D0[[2, 1]] + r*D0[[3, 1]] &&
  #[[1]] > D0[[2, 1]] - r*D0[[3, 1]] &]; n02 = Length[W11];
W12 = Flatten[Parallelize[Table[{Clear[Y, a, Z, Z0]; Z0 = W11[[k]]; Y = Z0[[6]]; a = Z0[[7]];
  Z = {Z0[[1]], Y*F4[Z0[[2]], Y, a, m1], Z0[[3]], Z0[[4]], Z0[[5]], Z0[[6]], Z0[[7]]};
  {Z}}, {k, 1, n02}]], 2]; W13 = Select[W12, #[[2]] < D0[[2, 2]] + r*D0[[3, 2]] &&
  #[[2]] > D0[[2, 2]] - r*D0[[3, 2]] &]; n03 = Length[W13];
W14 = Flatten[Parallelize[Table[{Clear[Y, a, Z, Z0]; Z0 = W13[[k]]; Y = Z0[[6]]; a = Z0[[7]];
  Z = {Z0[[1]], Z0[[2]], Y*F4[Z0[[3]], Y, a, m1], Z0[[4]], Z0[[5]], Z0[[6]], Z0[[7]]};
  {Z}}, {k, 1, n03}]], 2]; W15 = Select[W14, #[[3]] < D0[[2, 3]] + r*D0[[3, 3]] &&
  #[[3]] > D0[[2, 3]] - r*D0[[3, 3]] &]; n04 = Length[W15];
W16 = Flatten[Parallelize[Table[{Clear[Y, a, Z, Z0]; Z0 = W15[[k]]; Y = Z0[[6]]; a = Z0[[7]];
  Z = {Z0[[1]], Z0[[2]], Z0[[3]], Y*F4[Z0[[4]], Y, a, m1], Y*F4[Z0[[5]], Y, a, m1], Z0[[6]], Z0[[7]]};
  {Z}}, {k, 1, n04}]], 2]; Clear[W20]; W20 = Select[W16,
  #[[4]] < D0[[2, 4]] + r*D0[[3, 4]] && #[[4]] > D0[[2, 4]] - r*D0[[3, 4]] &&
  #[[5]] < D0[[2, 5]] + r*D0[[3, 5]] && #[[5]] > D0[[2, 5]] - r*D0[[3, 5]] &]; n05 = Length[W20]
184201
```

```
{Mean[Table[W20[[j, 6]], {j, 1, n05}],  $\sqrt{\text{Variance}[Table[W20[[j, 6]], {j, 1, n05}]}$ ]}
{131.605, 17.7687}
```

```
WW1 = Table[{W20[[j, 1]], W20[[j, 2]], W20[[j, 3]], W20[[j, 4]], W20[[j, 5]], 1}*(W20[[j, 6]])^(-1),
  {j, 1, n05}]; WW2 = Table[1, {j, 1, n05}];
WW3 = LeastSquares[WW1, WW2]; BB[{B1_, B2_, B3_, B4_, B5_}] :=
  WW3[[1]]*B1 + WW3[[2]]*B2 + WW3[[3]]*B3 + WW3[[4]]*B4 + WW3[[5]]*B5
+ WW3[[6]]; BBW = Table[
  BB[{W20[[j, 1]], W20[[j, 2]], W20[[j, 3]], W20[[j, 4]], W20[[j, 5]]}]/W20[[j, 6]] - 1, {j, 1, n05}];
D1 = {n01, n05, Mean[BBW],  $\sqrt{\text{Variance}[BBW]}$ }; D2 = {1 + D1[[3]], 1/(1 + D1[[3]])};
BB1[{B1_, B2_, B3_, B4_, B5_}] = D2[[2]]*BB[{B1, B2, B3, B4, B5}];
BBW = Table[BB1[{W20[[j, 1]], W20[[j, 2]], W20[[j, 3]], W20[[j, 4]], W20[[j, 5]]}]/W20[[j, 6]] - 1,
  {j, 1, n05}]; D3 = {n01, n05, Mean[BBW],  $\sqrt{\text{Variance}[BBW]}$  }
{5 000 000, 184 201, 2.00021*10-15, 0.0955571}
```

```
x1 = BB1[D0[[2]]]
```

```
141.407
```

```
ee = {{1, 0, 0, 0, 0}, {0, 1, 0, 0, 0}, {0, 0, 1, 0, 0}, {0, 0, 0, 1, 0}, {0, 0, 0, 0, 1}}; WS =
  Flatten[Table[{Clear[b1, b2, b3, b4, b5]; {b1, b2, b3, b4, b5} = D0[[2]] + (-1)^j*(D0[[3]].ee[[i]]) ee[[i]];
    {BB1[{b1, b2, b3, b4, b5}]}], {i, 1, 5}, {j, 0, 1}]; D4 = {Mean[WS],  $\sqrt{\text{Variance[WS]}$ }
```

```
{141.407, 6.59365}
```

```
x1 = D4[[1]]
```

```
141.407
```

```
27 * D4
```

```
{3817.99, 178.028}
```

```
D5 = D4[[2]] / D4[[1]]
```

```
0.0466289
```

```
r0 =  $\sqrt{D3[[4]]^2 + D5^2}$ 
```

```
0.106327
```

```
.11 * 3800
```

```
418.
```

ie for I1 we have 1800BC  $\pm$  400(800 at 95% CI)

Next we do L21 using 5 quintiles

```
KK = 5; D0 = DD[KK]; {n0, m1, b1, b2, b3, b4, b5, L1, L2} = {D0[[1]], 1.0/D0[[1]],
  D0[[2, 1]], D0[[2, 2]], D0[[2, 3]], D0[[2, 4]], D0[[2, 5]], D0[[2, 2]], 1.5*D0[[2, 5]] }
{1029, 0.000971817, 89.0055, 96.5624, 104.842, 114.359, 125.886, 96.5624, 188.83}
```

```
n01 = 5000000; Clear[W10]; r = 2;
```

```
W10 = Flatten[Parallelize[Table[{Clear[Y, a, J, Z, Z0, Z1]; Y = RandomReal[{L1, L2}];
  a = RandomReal[{.05, 1.3}]; J = RandomInteger[{1, 10000000}]; Z0 = W0[[J]];
  Z1 = {Y * F4[Z0[[1]], Y, a, m1], Z0[[2]], Z0[[3]], Z0[[4]], Z0[[5]]}; Z = Join[Z1, {Y, a}];
  {Z}}, {k, 1, n01}], 2]; W11 = Select[W10, #[[1]] < D0[[2, 1]] + r * D0[[3, 1]] &&
  #[[1]] > D0[[2, 1]] - r * D0[[3, 1]] &]; n02 = Length[W11];
```

```
W12 = Flatten[Parallelize[Table[{Clear[Y, a, Z, Z0]; Z0 = W11[[k]]; Y = Z0[[6]]; a = Z0[[7]];
  Z = {Z0[[1]], Y * F4[Z0[[2]], Y, a, m1], Z0[[3]], Z0[[4]], Z0[[5]], Z0[[6]], Z0[[7]]};
  {Z}}, {k, 1, n02}], 2]; W13 = Select[W12, #[[2]] < D0[[2, 2]] + r * D0[[3, 2]] &&
  #[[2]] > D0[[2, 2]] - r * D0[[3, 2]] &]; n03 = Length[W13];
```

```
W14 = Flatten[Parallelize[Table[{Clear[Y, a, Z, Z0]; Z0 = W13[[k]]; Y = Z0[[6]]; a = Z0[[7]];
  Z = {Z0[[1]], Z0[[2]], Y * F4[Z0[[3]], Y, a, m1], Z0[[4]], Z0[[5]], Z0[[6]], Z0[[7]]};
  {Z}}, {k, 1, n03}], 2]; W15 = Select[W14, #[[3]] < D0[[2, 3]] + r * D0[[3, 3]] &&
  #[[3]] > D0[[2, 3]] - r * D0[[3, 3]] &]; n04 = Length[W15];
```

```
W16 = Flatten[Parallelize[Table[{Clear[Y, a, Z, Z0]; Z0 = W15[[k]]; Y = Z0[[6]]; a = Z0[[7]];
  Z = {Z0[[1]], Z0[[2]], Z0[[3]], Y * F4[Z0[[4]], Y, a, m1], Y * F4[Z0[[5]], Y, a, m1], Z0[[6]], Z0[[7]]};
  {Z}}, {k, 1, n04}], 2]; Clear[W20]; W20 = Select[W16,
  #[[4]] < D0[[2, 4]] + r * D0[[3, 4]] && #[[4]] > D0[[2, 4]] - r * D0[[3, 4]] &&
  #[[5]] < D0[[2, 5]] + r * D0[[3, 5]] && #[[5]] > D0[[2, 5]] - r * D0[[3, 5]] &]; n05 = Length[W20]
```

```
238308
```

```
{Mean[Table[W20[[j, 6]], {j, 1, n05}],  $\sqrt{\text{Variance[Table[W20[[j, 6]], {j, 1, n05}]}}$ }
```

```
{135.73, 16.8171}
```

```

WW1 = Table[{W20[[j, 1]], W20[[j, 2]], W20[[j, 3]], W20[[j, 4]], W20[[j, 5]], 1}*(W20[[j, 6]]^(-1),
{j, 1, n05}); WW2 = Table[1, {j, 1, n05}];
WW3 = LeastSquares[WW1, WW2]; BB[{B1_, B2_, B3_, B4_, B5_}] :=
WW3[[1]]*B1 + WW3[[2]]*B2 + WW3[[3]]*B3 + WW3[[4]]*B4 + WW3[[5]]*B5
+ WW3[[6]]; BBW = Table[BB[{W20[[j, 1]], W20[[j, 2]], W20[[j, 3]], W20[[j, 4]], W20[[j, 5]]}]/W20[[j, 6]] -
1, {j, 1, n05}]; D1 = {n01, n05, Mean[BBW],  $\sqrt{\text{Variance[BBW]}$ } }
{5 000 000, 238 308, -0.0112503, 0.0866072}

WW3
{-0.610508, 0.0474205, 0.123362, 0.202087, 1.17647, 0.486372}

BB[D0[[2]]]
134.385

D2 = {1 + D1[[3]], 1/(1 + D1[[3]])}
{0.98875, 1.01138}

BB1[{B1_, B2_, B3_, B4_, B5_}] = D2[[2]]*BB[{B1, B2, B3, B4, B5}];

WW1 = Table[{W20[[j, 1]], W20[[j, 2]], W20[[j, 3]], W20[[j, 4]], W20[[j, 5]], 1}*(W20[[j, 6]]^(-1),
{j, 1, n05}); WW2 = Table[1, {j, 1, n05}];
WW3 = LeastSquares[WW1, WW2]; BB[{B1_, B2_, B3_, B4_, B5_}] :=
WW3[[1]]*B1 + WW3[[2]]*B2 + WW3[[3]]*B3 + WW3[[4]]*B4 + WW3[[5]]*B5
+ WW3[[6]]; BBW = Table[
BB[{W20[[j, 1]], W20[[j, 2]], W20[[j, 3]], W20[[j, 4]], W20[[j, 5]]}]/W20[[j, 6]] - 1, {j, 1, n05}];
D1 = {n01, n05, Mean[BBW],  $\sqrt{\text{Variance[BBW]}$ } }; D2 = {1 + D1[[3]], 1/(1 + D1[[3]])};
BB1[{B1_, B2_, B3_, B4_, B5_}] = D2[[2]]*BB[{B1, B2, B3, B4, B5}];
BBW = Table[BB1[{W20[[j, 1]], W20[[j, 2]], W20[[j, 3]], W20[[j, 4]], W20[[j, 5]]}]/W20[[j, 6]] - 1,
{j, 1, n05}]; D3 = {n01, n05, Mean[BBW],  $\sqrt{\text{Variance[BBW]}$ } }
{5 000 000, 238 308, 6.78057*10-17, 0.0875926}

g1 = BB1[D0[[2]]]
135.914

ee = {{1, 0, 0, 0, 0}, {0, 1, 0, 0, 0}, {0, 0, 1, 0, 0}, {0, 0, 0, 1, 0}, {0, 0, 0, 0, 1}}; WS =
Flatten[Table[{Clear[b1, b2, b3, b4, b5]; {b1, b2, b3, b4, b5} = D0[[2]] + (-1)^j*(D0[[3]].ee[[i]]) ee[[i]];
{BB1[{b1, b2, b3, b4, b5}]}, {i, 1, 5}, {j, 0, 1}]; D4 = {Mean[WS],  $\sqrt{\text{Variance[WS]}$ } }
{135.914, 4.85268}

t1 = D4[[1]]
135.914

27 * D4
{3669.69, 131.022}

D5 = D4[[2]]/D4[[1]]
0.035704

```



```
r0 =  $\sqrt{D3[[4]]^2 + D5^2}$ 
0.0945899
```

```
.09*3600
324.
```

ie for L21 we have 1600BC  $\pm$  325(650 at 95% CI)

Next we do U106 using 5 quintiles

```
KK = 6; D0 = DD[[KK]]; {n0, m1, b1, b2, b3, b4, b5, L1, L2} = {D0[[1]], 1.0/D0[[1]],
  D0[[2, 1]], D0[[2, 2]], D0[[2, 3]], D0[[2, 4]], D0[[2, 5]], D0[[2, 2]], 1.5*D0[[2, 5]] }
{1533, 0.000652316, 92.5846, 102.663, 114.04, 127.738, 144.532, 102.663, 216.797}

n01 = 5 000 000; Clear[ W10]; r = 2;
W10 = Flatten[Parallelize[Table[{Clear[ Y, a, J, Z, Z0, Z1]; Y = RandomReal[{L1, L2}];
  a = RandomReal[{.05, 1.3}]; J = RandomInteger[{1, 10 000 000}]; Z0 = W0[[J]];
  Z1 = {Y*F4[Z0[[1]], Y, a, m1], Z0[[2]], Z0[[3]], Z0[[4]], Z0[[5]]}; Z = Join[Z1, {Y, a}];
  {Z}}, {k, 1, n01}]], 2]; W11 = Select[W10, #[[1]] < D0[[2, 1]] + r*D0[[3, 1]] &&
  #[[1]] > D0[[2, 1]] - r*D0[[3, 1]] &]; n02 = Length[W11];
W12 = Flatten[Parallelize[Table[{Clear[ Y, a, Z, Z0]; Z0 = W11[[k]]; Y = Z0[[6]]; a = Z0[[7]];
  Z = {Z0[[1]], Y*F4[Z0[[2]], Y, a, m1], Z0[[3]], Z0[[4]], Z0[[5]], Z0[[6]], Z0[[7]]};
  {Z}}, {k, 1, n02}]], 2]; W13 = Select[W12, #[[2]] < D0[[2, 2]] + r*D0[[3, 2]] &&
  #[[2]] > D0[[2, 2]] - r*D0[[3, 2]] &]; n03 = Length[W13];
W14 = Flatten[Parallelize[Table[{Clear[ Y, a, Z, Z0]; Z0 = W13[[k]]; Y = Z0[[6]]; a = Z0[[7]];
  Z = {Z0[[1]], Z0[[2]], Y*F4[Z0[[3]], Y, a, m1], Z0[[4]], Z0[[5]], Z0[[6]], Z0[[7]]};
  {Z}}, {k, 1, n03}]], 2]; W15 = Select[W14, #[[3]] < D0[[2, 3]] + r*D0[[3, 3]] &&
  #[[3]] > D0[[2, 3]] - r*D0[[3, 3]] &]; n04 = Length[W15];
W16 = Flatten[Parallelize[Table[{Clear[ Y, a, Z, Z0]; Z0 = W15[[k]]; Y = Z0[[6]]; a = Z0[[7]];
  Z = {Z0[[1]], Z0[[2]], Z0[[3]], Y*F4[Z0[[4]], Y, a, m1], Y*F4[Z0[[5]], Y, a, m1], Z0[[6]], Z0[[7]]};
  {Z}}, {k, 1, n04}]], 2]; Clear[W20]; W20 = Select[W16,
  #[[4]] < D0[[2, 4]] + r*D0[[3, 4]] && #[[4]] > D0[[2, 4]] - r*D0[[3, 4]] &&
  #[[5]] < D0[[2, 5]] + r*D0[[3, 5]] && #[[5]] > D0[[2, 5]] - r*D0[[3, 5]] &]; n05 = Length[W20]
251586

D0
{1533, {92.5846, 102.663, 114.04, 127.738, 144.532}, {6.10225, 6.59259, 7.74065, 9.00197, 10.6095}}

W20[[1]]
{87.2573, 110.743, 114.902, 142.764, 157.358, 179.199, 0.483426}

{Mean[ Table[ W20[[j, 6]], {j, 1, n05}],  $\sqrt{\text{Variance}[ Table[ W20[[j, 6]], {j, 1, n05} ] ]}$  }
{156.545, 21.4071}

WW1 = Table[ { W20[[j, 1]], W20[[j, 2]], W20[[j, 3]], W20[[j, 4]], W20[[j, 5]], 1} * (W20[[j, 6]])^(-1),
  {j, 1, n05}]; WW2 = Table[ 1, {j, 1, n05}];
WW3 = LeastSquares[WW1, WW2]; BB[{B1_, B2_, B3_, B4_, B5_}] :=
  WW3[[1]]*B1 + WW3[[2]]*B2 + WW3[[3]]*B3 + WW3[[4]]*B4 + WW3[[5]]*B5
+ WW3[[6]]; BBW = Table[
  BB[ {W20[[j, 1]], W20[[j, 2]], W20[[j, 3]], W20[[j, 4]], W20[[j, 5]] } / W20[[j, 6]] - 1, {j, 1, n05}];
D1 = {n01, n05, Mean[BBW],  $\sqrt{\text{Variance}[BBW]}$  }; D2 = {1 + D1[[3]], 1/(1 + D1[[3])};
BB1[{B1_, B2_, B3_, B4_, B5_}] = D2[[2]]*BB[{B1, B2, B3, B4, B5}];
BBW = Table[BB1[ {W20[[j, 1]], W20[[j, 2]], W20[[j, 3]], W20[[j, 4]], W20[[j, 5]] } / W20[[j, 6]] - 1,
  {j, 1, n05}]; D3 = {n01, n05, Mean[BBW],  $\sqrt{\text{Variance}[BBW]}$  }
{5 000 000, 251586, -1.53004 $\times 10^{-16}$ , 0.0893821}
```

```
g1 = BB1[D0[[2]]]
```

```
162.787
```

```
ee = {{1, 0, 0, 0, 0}, {0, 1, 0, 0, 0}, {0, 0, 1, 0, 0}, {0, 0, 0, 1, 0}, {0, 0, 0, 0, 1}}; WS =
  Flatten[Table[{Clear[b1, b2, b3, b4, b5]; {b1, b2, b3, b4, b5} = D0[[2]] + (-1)^j*(D0[[3]].ee[[i]]) ee[[i]];
    {BB1[{b1, b2, b3, b4, b5}]}, {i, 1, 5}, {j, 0, 1}]]; D4 = {Mean[WS], Sqrt[Variance[WS] ]}
```

```
{162.787, 6.86725}
```

```
t1 = D4[[1]]
```

```
162.787
```

```
27 * D4
```

```
{4395.25, 185.416}
```

```
D5 = D4[[2]]/D4[[1]]
```

```
0.0421855
```

```
r0 = Sqrt[D3[[4]]^2 + D5^2]
```

```
0.0988371
```

```
.10 * 4400
```

```
440.
```

ie for U106 we have 2400BC ± 440(880 at 95% CI)

Next we do J2 using 5 quintiles

```
KK = 7; D0 = DD[[KK]]; {n0, m1, b1, b2, b3, b4, b5, L1, L2} = {D0[[1]], 1.0/D0[[1]],
  D0[[2, 1]], D0[[2, 2]], D0[[2, 3]], D0[[2, 4]], D0[[2, 5]], D0[[2, 2]], 1.5*D0[[2, 5]] }
{1241, 0.000805802, 176.613, 223.176, 272.816, 340.009, 500.669, 223.176, 751.003}
```

```
n01 = 5000000; Clear[W10]; r = 2;
```

```
W10 = Flatten[Parallelize[Table[{Clear[Y, a, J, Z, Z0, Z1]; Y = RandomReal[{L1, L2}];
  a = RandomReal[{.05, 1.3}]; J = RandomInteger[{1, 10000000}]; Z0 = W0[[J]];
  Z1 = {Y * F4[Z0[[1]], Y, a, m1], Z0[[2]], Z0[[3]], Z0[[4]], Z0[[5]]}; Z = Join[Z1, {Y, a}];
  {Z}}, {k, 1, n01}]], 2]; W11 = Select[W10, #[[1]] < D0[[2, 1]] + r * D0[[3, 1]] &&
  #[[1]] > D0[[2, 1]] - r * D0[[3, 1]] &]; n02 = Length[W11];
```

```
W12 = Flatten[Parallelize[Table[{Clear[Y, a, Z, Z0]; Z0 = W11[[k]]; Y = Z0[[6]]; a = Z0[[7]];
  Z = {Z0[[1]], Y * F4[Z0[[2]], Y, a, m1], Z0[[3]], Z0[[4]], Z0[[5]], Z0[[6]], Z0[[7]]};
  {Z}}, {k, 1, n02}]], 2]; W13 = Select[W12, #[[2]] < D0[[2, 2]] + r * D0[[3, 2]] &&
  #[[2]] > D0[[2, 2]] - r * D0[[3, 2]] &]; n03 = Length[W13];
```

```
W14 = Flatten[Parallelize[Table[{Clear[Y, a, Z, Z0]; Z0 = W13[[k]]; Y = Z0[[6]]; a = Z0[[7]];
  Z = {Z0[[1]], Z0[[2]], Y * F4[Z0[[3]], Y, a, m1], Z0[[4]], Z0[[5]], Z0[[6]], Z0[[7]]};
  {Z}}, {k, 1, n03}]], 2]; W15 = Select[W14, #[[3]] < D0[[2, 3]] + r * D0[[3, 3]] &&
  #[[3]] > D0[[2, 3]] - r * D0[[3, 3]] &]; n04 = Length[W15];
```

```
W16 = Flatten[Parallelize[Table[{Clear[Y, a, Z, Z0]; Z0 = W15[[k]]; Y = Z0[[6]]; a = Z0[[7]];
  Z = {Z0[[1]], Z0[[2]], Z0[[3]], Y * F4[Z0[[4]], Y, a, m1], Y * F4[Z0[[5]], Y, a, m1], Z0[[6]], Z0[[7]]};
  {Z}}, {k, 1, n04}]], 2]; Clear[W20]; W20 = Select[W16,
  #[[4]] < D0[[2, 4]] + r * D0[[3, 4]] && #[[4]] > D0[[2, 4]] - r * D0[[3, 4]] &&
  #[[5]] < D0[[2, 5]] + r * D0[[3, 5]] && #[[5]] > D0[[2, 5]] - r * D0[[3, 5]] &]; n05 = Length[W20]
```

```
338773
```

```

{Mean[Table[W20[[j, 6]], {j, 1, n05}],  $\sqrt{\text{Variance}[Table[W20[[j, 6]], {j, 1, n05}]}$ ]}
{482.675, 106.163}

WW1 = Table[{W20[[j, 1]], W20[[j, 2]], W20[[j, 3]], W20[[j, 4]], W20[[j, 5]], 1}*(W20[[j, 6]])^(-1),
{j, 1, n05}; WW2 = Table[1, {j, 1, n05}];
WW3 = LeastSquares[WW1, WW2]; BB[{B1_, B2_, B3_, B4_, B5_}] :=
WW3[[1]]*B1 + WW3[[2]]*B2 + WW3[[3]]*B3 + WW3[[4]]*B4 + WW3[[5]]*B5
+ WW3[[6]]; BBW = Table[
BB[{W20[[j, 1]], W20[[j, 2]], W20[[j, 3]], W20[[j, 4]], W20[[j, 5]]}/W20[[j, 6]] - 1, {j, 1, n05}];
D1 = {n01, n05, Mean[BBW],  $\sqrt{\text{Variance}[BBW]}$ }; D2 = {1 + D1[[3]], 1/(1 + D1[[3]])};
BB1[{B1_, B2_, B3_, B4_, B5_}] = D2[[2]]*BB[{B1, B2, B3, B4, B5}];
BBW = Table[BB1[{W20[[j, 1]], W20[[j, 2]], W20[[j, 3]], W20[[j, 4]], W20[[j, 5]]}/W20[[j, 6]] - 1,
{j, 1, n05}]; D3 = {n01, n05, Mean[BBW],  $\sqrt{\text{Variance}[BBW]}$  }
{5 000 000, 338 773, -9.58356×10-16, 0.107998}

t1 = BB1[D0[[2]]]
650.798

ee = {{1, 0, 0, 0, 0}, {0, 1, 0, 0, 0}, {0, 0, 1, 0, 0}, {0, 0, 0, 1, 0}, {0, 0, 0, 0, 1}}; WS =
Flatten[Table[{Clear[b1, b2, b3, b4, b5]; {b1, b2, b3, b4, b5} = D0[[2]] + (-1)^j*(D0[[3]].ee[[i]]) ee[[i]];
{BB1[{b1, b2, b3, b4, b5}]}, {i, 1, 5}, {j, 0, 1}]; D4 = {Mean[WS],  $\sqrt{\text{Variance}[WS]}$  }
{650.798, 66.5992}

t1 = D4[[1]]
650.798

27 * D4
{17571.6, 1798.18}

D5 = D4[[2]]/D4[[1]]
0.102335

r0 =  $\sqrt{D3[[4]]^2 + D5^2}$ 
0.148781

.15 * 17500
2625.

ie for J2 we have 15500BC ± 2600(5200 at 95% CI), this is definitely Paleolithic.

Next we do P312 using 5 quintiles

KK = 8; D0 = DD[KK]; {n0, m1, b1, b2, b3, b4, b5, L1, L2} = {D0[[1]], 1.0/D0[[1]],
D0[[2, 1]], D0[[2, 2]], D0[[2, 3]], D0[[2, 4]], D0[[2, 5]], D0[[2, 2]], 1.5*D0[[2, 5]] }
{971, 0.00102987, 98.4029, 107.6, 117.107, 128.584, 143.855, 107.6, 215.782}

```

```

n01 = 5 000 000; Clear[ W10]; r = 2;
W10 = Flatten[Parallelize[Table[{Clear[ Y, a, J, Z, Z0, Z1]; Y = RandomReal[{L1, L2}];
a = RandomReal[ {.05, 1.3}]; J = RandomInteger[{1, 10 000 000}]; Z0 = W0[[J]];
Z1 = {Y*F4[Z0[[1]], Y, a, m1], Z0[[2]], Z0[[3]], Z0[[4]], Z0[[5]]}; Z = Join[Z1, {Y, a}];
{Z}}, {k, 1, n01}]], 2]; W11 = Select[W10, #[[1]] < D0[[2, 1]] + r*D0[[3, 1]] &&
#[[1]] > D0[[2, 1]] - r*D0[[3, 1]] &]; n02 = Length[W11];
W12 = Flatten[Parallelize[Table[{Clear[ Y, a, Z, Z0]; Z0 = W11[[k]]; Y = Z0[[6]]; a = Z0[[7]];
Z = {Z0[[1]], Y*F4[Z0[[2]], Y, a, m1], Z0[[3]], Z0[[4]], Z0[[5]], Z0[[6]], Z0[[7]]};
{Z}}, {k, 1, n02}]], 2]; W13 = Select[W12, #[[2]] < D0[[2, 2]] + r*D0[[3, 2]] &&
#[[2]] > D0[[2, 2]] - r*D0[[3, 2]] &]; n03 = Length[W13];
W14 = Flatten[Parallelize[Table[{Clear[ Y, a, Z, Z0]; Z0 = W13[[k]]; Y = Z0[[6]]; a = Z0[[7]];
Z = {Z0[[1]], Z0[[2]], Y*F4[Z0[[3]], Y, a, m1], Z0[[4]], Z0[[5]], Z0[[6]], Z0[[7]]};
{Z}}, {k, 1, n03}]], 2]; W15 = Select[W14, #[[3]] < D0[[2, 3]] + r*D0[[3, 3]] &&
#[[3]] > D0[[2, 3]] - r*D0[[3, 3]] &]; n04 = Length[W15];
W16 = Flatten[Parallelize[Table[{Clear[ Y, a, Z, Z0]; Z0 = W15[[k]]; Y = Z0[[6]]; a = Z0[[7]];
Z = {Z0[[1]], Z0[[2]], Z0[[3]], Y*F4[Z0[[4]], Y, a, m1], Y*F4[Z0[[5]], Y, a, m1], Z0[[6]], Z0[[7]]};
{Z}}, {k, 1, n04}]], 2]; Clear[ W20]; W20 = Select[W16,
#[[4]] < D0[[2, 4]] + r*D0[[3, 4]] && #[[4]] > D0[[2, 4]] - r*D0[[3, 4]] &&
#[[5]] < D0[[2, 5]] + r*D0[[3, 5]] && #[[5]] > D0[[2, 5]] - r*D0[[3, 5]] &]; n05 = Length[W20]
268 262

```

```

{Mean[ Table[ W20[[j, 6]], {j, 1, n05}]],  $\sqrt{\text{Variance}[ \text{Table}[ W20[[j, 6]], {j, 1, n05} ]]}$ 
{153.844, 20.707}

```

```

WW1 = Table[ { W20[[j, 1]], W20[[j, 2]], W20[[j, 3]], W20[[j, 4]], W20[[j, 5]], 1} * (W20[[j, 6]] ^ (-1),
{j, 1, n05}]; WW2 = Table[ 1, {j, 1, n05}];
WW3 = LeastSquares[WW1, WW2]; BB[{B1_, B2_, B3_, B4_, B5_}] :=
WW3[[1]]*B1 + WW3[[2]]*B2 + WW3[[3]]*B3 + WW3[[4]]*B4 + WW3[[5]]*B5
+ WW3[[6]]; BBW = Table[
BB[ {W20[[j, 1]], W20[[j, 2]], W20[[j, 3]], W20[[j, 4]], W20[[j, 5]]} ] / W20[[j, 6]] - 1, {j, 1, n05}];
D1 = {n01, n05, Mean[BBW],  $\sqrt{\text{Variance}[BBW]}$  }; D2 = {1 + D1[[3]], 1 / (1 + D1[[3]])};
BB1[{B1_, B2_, B3_, B4_, B5_}] = D2[[2]]*BB[{B1, B2, B3, B4, B5}];
BBW = Table[ BB1[ {W20[[j, 1]], W20[[j, 2]], W20[[j, 3]], W20[[j, 4]], W20[[j, 5]]} ] / W20[[j, 6]] - 1,
{j, 1, n05}]; D3 = {n01, n05, Mean[BBW],  $\sqrt{\text{Variance}[BBW]}$  }
{5 000 000, 268 262, -3.42538×10-17, 0.0886386}

```

```
t1 = BB1[D0[[2]]]
```

```
156.838
```

```

ee = {{1, 0, 0, 0, 0}, {0, 1, 0, 0, 0}, {0, 0, 1, 0, 0}, {0, 0, 0, 1, 0}, {0, 0, 0, 0, 1}}; WS =
Flatten[Table[ {Clear[b1, b2, b3, b4, b5]; {b1, b2, b3, b4, b5} = D0[[2]] + (-1)^j*(D0[[3]].ee[[i]]) ee[[i]];
{BB1[{b1, b2, b3, b4, b5}]}], {i, 1, 5}, {j, 0, 1}]; D4 = {Mean[WS],  $\sqrt{\text{Variance}[WS]}$  }
{156.838, 6.66823}

```

```
t1 = D4[[1]]
```

```
156.838
```

```
27 * D4
```

```
{4234.63, 180.042}
```

```
D5 = D4[[2]] / D4[[1]]
```

```
0.0425166
```

$$r_0 = \sqrt{D3[[4]]^2 + D5^2}$$

0.098308

ie for P312 we have 2240BC ± 420(820 at 95% CI)

This information can be summarized by following showing the two means compared with our calc TMRCA and SD

| SNP    | mean1     | mean2   | TMRCA     | SD   |
|--------|-----------|---------|-----------|------|
| G2a3   | 5231 BC   | 4747 BC | 5359 BC   | 912  |
| R1b1a2 | 5787 BC   | 2901 BC | 3700 BC   | 625  |
| R1a1   | 2495 BC   | 2157 BC | 3800 BC   | 700  |
| I1     | 1319 BC   | 1049 BC | 1800 BC   | 400  |
| L21    | 1224 BC   | 1346 BC | 1600 BC   | 325  |
| U106   | 1301 BC   | 1352 BC | 2400 BC   | 440  |
| J2     | 11 549 BC | 5379 BC | 15 500 BC | 2600 |
| P312   | 1593 BC   | 1675 BC | 2240 BC   | 420  |

The means only give the right ballpark estimate, usually more than a SD less than the true TMRCA.
